# Supplementary material for: Direct oxidation of bromo-derived Fischer–Borsche oxo-ring using molecular iodine with combined experimental and computational study
Source: Royal Society of Chemistry journal article supplement (doi:10.1039/d2ob00793b), 2022-01-01

## Supporting Information

### **Direct oxidation of bromo-derived Fischer-Borsche oxo-ring using molecular iodine with combined experimental and computational study**

Vivek T. Humne,<sup>a†</sup> Monica H. Ghom,<sup>b</sup> Mahavir S. Naykode,<sup>b</sup> Yuvraj Dangat,<sup>c</sup> Kumar Vanka<sup>c</sup>

Pradeep Lokhande<sup>b</sup>

<sup>a</sup>Department of Chemistry, Shri R. R. Lahoti Science College, Morshi, India

<sup>b</sup>Department of Chemistry, Savitribai Phule Pune University, Pune, 411007, India

<sup>c</sup>Division of Physical Chemistry, CSIR-National Chemical Laboratory, Pune, 411008, India

*E-mail: vivekhumne2013@gmail.com*

### **Table of Contents**

|                                                                                              |    |
|----------------------------------------------------------------------------------------------|----|
| General Information.....                                                                     | 2  |
| General method for the preparation of substituted 1-oxo-2-Bromo-tetrahydrocarbazoles.....    | 2  |
| Representative procedure for the synthesis of Carbazolo-1,4-quinone by molecular iodine..... | 6  |
| Isotope Labeling Experiment.....                                                             | 10 |
| Computational Details.....                                                                   | 12 |
| References.....                                                                              | 14 |
| Spectral data.....                                                                           | 29 |

## General Information

The NMR experiments were performed with 300 MHz, 400 MHz and 500 MHz spectrometer, and chemical shifts are expressed in ppm ( $\delta$ ) with TMS as an internal reference. *J* values are given in hertz. The  $^1\text{H}$  and  $^{13}\text{C}$  NMR spectra are referenced to the residual solvent signals (7.26 ppm for  $^1\text{H}$  and 77.0 ppm for  $^{13}\text{C}$  in  $\text{CDCl}_3$ , 2.50 ppm for  $^1\text{H}$  and 39.9 ppm for  $^{13}\text{C}$  in  $\text{DMSO-}d_6$ ). TOF and quadruple mass analyzer types were used for the HRMS measurements. Column chromatography was performed on silica gel (100–200 mesh) in glass columns to purify the compounds and visualized with UV light (254 nm), PMA and DNP stain. Commercially available reagents and solvents were used without further purification and were purchased.

### (a) General method for the preparation of substituted 1-oxo-2-Bromo-tetrahydrocarbazoles (2):

In a 100 mL round bottom flask, copper (II) bromide,  $\text{CuBr}_2$  (2.17 mmol) was dissolved in ethylacetate (20 mL) and chloroform (20 mL). To this reaction mixture, 1-oxotetrahydrocarbazole (1.08 mmol) was added and stirred at 120 °C for 6 h. The process of the reaction was monitored by TLC. After completion of the reaction, filter the reaction mixture in hot condition. The mother liquor diluted with ethylacetate, washed with  $\text{H}_2\text{O}$ , dried over  $\text{Na}_2\text{SO}_4$  and evaporated. The residue was purified by column chromatography (ethylacetate:hexane: : 2:8).

**1-oxo-2-bromo-tetrahydrocarbazole (2a):** Yield: 194 mg (68 %); mp 139-142 °C;  $^1\text{H}$  NMR (300 MHz,  $\text{DMSO-}d_6$ ):  $\delta$  11.78 (s, 1H), 7.69 (d, *J* = 8.0 Hz, 1H), 7.43 – 7.29 (m, 2H), 7.10 (t, *J* = 8.5 Hz, 1H), 4.94 (t, *J* = 13.2 Hz, 1H), 3.06 – 2.91 (m, 2H), 2.63 – 2.49 (m, 2H);  $^{13}\text{C}$  NMR (75 MHz,  $\text{DMSO-}d_6$ ): 189.3, 127.0, 126.9, 124.4, 124.2, 120.7, 120.1, 119.9, 112.6, 67.8, 47.5, 21.3; HRMS (ESI-qTOF) Calcd for  $\text{C}_{12}\text{H}_{10}\text{BrNO}$  [ $\text{M}+\text{H}$ ] $^+$ , 263.9946, Found 263.0037.

**1-oxo-2-bromo-6-cyano-tetrahydrocarbazole (2b):** Yield: 194 mg (70 %); mp 167-169 °C; <sup>1</sup>H NMR (300 MHz, DMSO-*d*<sub>6</sub>): δ 12.38 (s, 1H), 8.29 (s, 1H), 7.61 (d, *J* = 8.1 Hz, 1H), 7.50 (d, *J* = 8.4 Hz, 1H), 4.94 (t, *J* = 13.2 Hz, 1H), 3.06 – 2.91 (m, 2H), 2.63 – 2.49 (m, 2H); <sup>13</sup>C NMR (75 MHz, DMSO-*d*<sub>6</sub>): 183.6, 139.9, 130.0, 129.2, 128.0, 126.0, 124.5, 120.5, 114.0, 112.6, 67.8, 47.5, 21.3; HRMS (ESI) *m/z* = [M + H]<sup>+</sup> Calcd for C<sub>13</sub>H<sub>9</sub>BrN<sub>2</sub>O 288.9898, Found 288.9789.

**1-oxo-2-bromo-tetrahydrocarbazole-6-methylcarboxylate (2c):** Yield: 173 mg (65 %); mp 140-142 °C; <sup>1</sup>H NMR (300 MHz, DMSO-*d*<sub>6</sub>): δ 12.03 (s, 1H), 8.32 (s, 1H), 7.87 (d, *J* = 8.1 Hz, 1H), 7.44 (d, *J* = 8.1 Hz, 1H), 4.34 (d, *J* = 7.5 Hz, 1H), 3.83 (s, 3H), 3.49-2.91 (m, 2H), 2.47-2.06 (m, 2H); <sup>13</sup>C NMR (75 MHz, DMSO-*d*<sub>6</sub>): 187.6, 166.0, 147.9, 133.8, 129.7, 123.7, 122.1, 121.8, 113.6, 111.0, 53.9, 51.5, 34.2, 21.2; HRMS (ESI-qTOF) Calcd for C<sub>14</sub>H<sub>12</sub>BrNO<sub>3</sub> [M+H]<sup>+</sup>, 322.0073, Found 322.0103.

**1-oxo-2-bromo-6-chloro-tetrahydrocarbazole (2d):** Yield: 184 mg (67 %); mp 182-185 °C; <sup>1</sup>H NMR (300 MHz, DMSO-*d*<sub>6</sub>): δ 11.76 (s, 1H), 7.67 (s, 1H), 7.37 (d, *J* = 8.2 Hz, 1H), 7.27 (d, *J* = 8.2 Hz, 1H), 4.84 (t, *J* = 13.1 Hz, 1H), 2.97-2.89 (m, 2H), 2.62 – 2.45 (m, 2H); <sup>13</sup>C NMR (75 MHz, DMSO-*d*<sub>6</sub>): 190.1, 136.3, 132.0, 126.5, 126.1, 124.0, 120.1, 114.3, 112.6, 67.8, 47.5, 21.3; HRMS (ESI-qTOF) Calcd for C<sub>12</sub>H<sub>9</sub>BrClNO [M+H]<sup>+</sup>, 297.9556, Found 297.8769.

**1-oxo-2-bromo-3-methyl-tetrahydrocarbazole (2e):** Yield: 188 mg (67%); mp 131-134 °C; <sup>1</sup>H NMR (300 MHz, CDCl<sub>3</sub>): δ 9.32 (s, 1H), 7.65 (d, *J* = 8.1 Hz, 1H), 7.45 (d, *J* = 8.1 Hz, 1H), 7.37 (t, *J* = 6.6 Hz, 1H), 7.15 (t, *J* = 7.2 Hz, 1H), 4.83 (d, *J* = 6.3 Hz, 1H), 3.20-2.46 (m, 3H), 1.15 (d, *J* = 4.2 Hz, 3H); <sup>13</sup>C NMR (75 MHz, CDCl<sub>3</sub>): δ 189.9, 137.7, 130.4, 127.3, 125.4, 124.6, 120.1, 118.9, 112.1, 45.8, 32.1, 28.8, 29.6; HRMS (ESI-qTOF) Calcd for C<sub>13</sub>H<sub>12</sub>BrNO [M + H]<sup>+</sup> 278.0102, Found 278.1058.

**1-oxo-2-bromo-3,6-dimethyl-tetrahydrocarbazole (2f):** Yield: 188 mg (68 %); decomposed > 173 °C; <sup>1</sup>H NMR (300 MHz, DMSO-*d*<sub>6</sub>): δ 11.41 (s, 1H), 7.36 (s, 1H), 7.26 (d, *J* = 8.1 Hz, 1H), 7.09 (d, *J* = 8.1 Hz, 1H), 4.81 (d, *J* = 1.8 Hz, 1H), 3.15 (s, 3H), 3.02-2.95 (m, 1H), 2.57 (d, *J* = 13.5 Hz, 2H), 1.08 (d, *J* = 5.1 Hz, 3H); <sup>13</sup>C NMR (75 MHz, DMSO-*d*<sub>6</sub>): 190.0, 136.6, 131.0, 128.3, 128.0, 126.9, 125.3, 120.3, 112.7, 58.8, 32.5, 29.1, 21.2, 21.0; HRMS (ESI-qTOF) Calcd for C<sub>14</sub>H<sub>14</sub>BrNO[M+H]<sup>+</sup> 292.0259, Found 292.0319.

**1-oxo-2-bromo-3-methyl-6-cyano-tetrahydrocarbazole (2g):** Yield: 193 mg (71 %); mp 197-199 °C; <sup>1</sup>H NMR (300 MHz, DMSO-*d*<sub>6</sub>): δ 12.38 (s, 1H), 8.29 (s, 1H), 7.61 (d, *J* = 8.1 Hz, 1H), 7.50 (d, *J* = 8.4 Hz, 1H), 4.83 (d, *J* = 6.3 Hz, 1H), 3.20-2.46 (m, 3H), 1.15 (d, *J* = 4.2 Hz, 3H); <sup>13</sup>C NMR (75 MHz, DMSO-*d*<sub>6</sub>): 183.6, 139.9, 130.0, 129.2, 128.0, 126.0, 124.5, 120.5, 114.0, 102.2, 60.1, 36.1, 26.1, 19.1; HRMS (ESI-qTOF) Calcd for C<sub>14</sub>H<sub>11</sub>BrN<sub>2</sub>O [M + H]<sup>+</sup> 303.0055, Found 303.0199.

**1-oxo-2-bromo-3-methyl-tetrahydrocarbazole-6-methylcarboxylate (2h):** Yield: 189 mg (72 %); mp 286-288 °C; <sup>1</sup>H NMR (300 MHz, CDCl<sub>3</sub>): δ 11.41 (s, 1H), 8.41 (s, 1H), 7.98 (d, *J* = 7.5 Hz, 1H), 7.48 (d, *J* = 8.1 Hz, 1H), 4.52 (d, *J* = 6.5 Hz, 1H), 3.93 (s, 3H), 3.43-2.42 (m, 3H); 1.31 (d, *J* = 6.0 Hz, 3H); <sup>13</sup>C NMR (75 MHz, CDCl<sub>3</sub>): 183.6, 167.0, 141.1, 129.2, 127.2, 124.8, 124.1, 121.9, 115.4, 112.5, 58.9, 51.5, 36.8, 25.8, 19.0; HRMS (ESI-qTOF) Calcd for C<sub>15</sub>H<sub>14</sub>BrNO<sub>3</sub>[M + H]<sup>+</sup> 336.0157, Found 336.1218.

**1-oxo-2-bromo-6-chloro-3-methyl- tetrahydrocarbazole (2i):** Yield: 183 mg (68 %); mp 167-170 °C; <sup>1</sup>H NMR (300 MHz, DMSO-*d*<sub>6</sub>): δ 11.76 (s, 1H), 7.67 (s, 1H), 7.37 (d, *J* = 8.1 Hz, 1H), 7.27 (d, *J* = 8.1 Hz, 1H), 4.84 (s, 1H), 2.97 (d, *J* = 15.5 Hz, 1H), 2.48-2.35 (m, 2H), 1.09 (s, 3H); <sup>13</sup>C NMR (75 MHz, DMSO-*d*<sub>6</sub>): 190.1, 136.3, 132.0, 126.5, 126.1, 126.0, 124.0, 120.1, 114.3,

59.3, 32.2, 28.7, 20.9; HRMS (ESI-qTOF) Calcd for C<sub>13</sub>H<sub>11</sub>BrClNO [M+H]<sup>+</sup>, 311.9713, Found 311.9002.

**1-oxo-2,6-dibromo-3-methyl-tetrahydrocarbazole (2j):** Yield: 175 mg (68 %); mp 186-188 °C; <sup>1</sup>H NMR (300 MHz, DMSO-*d*<sub>6</sub>): δ 11.59 (s, 1H), 7.66 (s, 1H), 7.03-6.92 (m, 2H), 4.87 (bs, 1H), 3.11-2.81 (m, 1H), 2.48-2.33 (m, 2H), 0.56 (d, *J* = 3.3 Hz, 3H); <sup>13</sup>C NMR (75 MHz, DMSO-*d*<sub>6</sub>): 190.3, 139.2, 132.6, 127.8, 127.4, 124.8, 120.0, 113.9, 101.7, 59.1, 32.1, 28.6, 20.9; HRMS (ESI) *m/z* = [M+H]<sup>+</sup> Calcd for C<sub>13</sub>H<sub>11</sub>Br<sub>2</sub>NO 357.9187, Found 357.8265.

**1-oxo-2-bromo-3-methyl-6,8-dichloro-tetrahydrocarbazole (2k):** Yield: 197 mg (76 %); mp 169-172 °C; <sup>1</sup>H NMR (300 MHz, DMSO-*d*<sub>6</sub>): δ 12.4 (s, 1H), 7.79 (s, 1H), 7.50 (s, 1H), 4.74 (bs, 1H), 3.03 – 2.94 (m, 2H), 2.49 – 2.39 (m, 1H) 1.17 (d, *J* = 3.3 Hz, 3H); <sup>13</sup>C NMR (75 MHz, DMSO-*d*<sub>6</sub>): 188.7, 139.5, 135.2, 133.1, 131.9, 130.9, 129.8, 124.8, 123.4, 65.4, 41.2, 30.6, 23.9; HRMS (ESI-qTOF) Calcd for C<sub>13</sub>H<sub>10</sub>BrCl<sub>2</sub>NO [M + H]<sup>+</sup> 345. 9323, Found 345.9405.

**N-Propyl-1-oxo-2-bromo-3-methyl-tetrahydrocarbazole (2l):** Yield: 184 mg (69%) ; <sup>1</sup>H NMR (400 MHz, DMSO-*d*<sub>6</sub>): δ 8.19 (d, *J* = 2.8 Hz, 1H), 7.81 (d, *J* = 9.2 Hz, 1H), 7.72-7.65 (m, 1H), 7.58 (d, *J* = 8.8 Hz, 1H), 4.83 – 4.53 (m, 3H), 3.20 – 2.46 (m, 3H), 1.78 – 1.61 (m, 5H), 0.85 (t, *J* = 6.8 Hz, 3H); <sup>13</sup>C NMR (101 MHz, DMSO-*d*<sub>6</sub>): δ 183.19, 180.81, 147.47, 137.53, 133.28, 129.43, 124.60, 117.51, 115.41, 46.3, 45.8, 32.1, 29.6, 28.8, 23.3, 15.6; HRMS (ESI-qTOF) Calcd for C<sub>16</sub>H<sub>18</sub>BrNO [M+H]<sup>+</sup>, 320.0572: found 320.1142.

**N-Propyl-1-oxo-2-bromo-tetrahydrocarbazole (2m):** Yield: 179 mg (66 %); mp 123-125 °C; <sup>1</sup>H NMR (300 MHz, DMSO-*d*<sub>6</sub>): δ 7.69 (d, *J* = 8.0 Hz, 1H), 7.43 – 7.29 (m, 2H), 7.10 (t, *J* = 8.5 Hz, 1H), 4.94 (m, 3H), 3.06 – 2.91 (m, 2H), 2.63 – 2.49 (m, 4H), 0.85 (t, *J* = 6.8 Hz, 3H); <sup>13</sup>C NMR (75 MHz, DMSO-*d*<sub>6</sub>): 189.3, 127.0, 126.9, 124.4, 124.2, 120.7, 120.1, 119.9, 112.6, 67.8,

46.3, 45.8, 32.1, 29.6, 23.3; HRMS (ESI-qTOF) Calcd for C<sub>15</sub>H<sub>16</sub>BrNO [M+H]<sup>+</sup>, 306.0415, Found 306.1105.

***N*-Benzyl-1-oxo-2-bromo-tetrahydrocarbazole (2n):** 168 mg (65%) ; mp 137-140 °C; <sup>1</sup>H NMR (400 MHz, DMSO-*d*<sub>6</sub>): δ 8.07 (d, *J* = 7.6 Hz, 1H), 7.71 (d, *J* = 8.4 Hz, 1H), 7.44-7.33 (m, 2H), 7.27-7.20 (m, 3H), 7.16 (d, *J* = 7.2 Hz, 2H), 5.86 (s, 2H), 4.94 (t, *J* = 13.2 Hz, 1H), 3.06 – 2.91 (m, 2H), 2.63 – 2.49 (m, 2H); <sup>13</sup>C NMR (101 MHz, DMSO-*d*<sub>6</sub>): δ 181.20, 173.14, 140.98, 140.22, 139.47, 139.27, 137.16, 136.71, 129.18, 129.09, 128.07, 127.93, 125.51, 48.15, 67.8, 47.5, 21.3; HRMS (ESI-qTOF) Calcd for C<sub>19</sub>H<sub>16</sub>BrNO [M+H]<sup>+</sup>, 354.0415: found 354.1015.

***N*-Methyl-1-oxo-2-bromo-tetrahydrocarbazole (2o):** Yield: 168 mg (60%); mp 111-115 °C; <sup>1</sup>H NMR (300 MHz, DMSO-*d*<sub>6</sub>): δ 7.69 (d, *J* = 8.0 Hz, 1H), 7.43 -7.29 (m, 2H), 7.10 (t, *J* = 8.5 Hz, 1H), 4.94 (t, *J* = 13.2 Hz, 1H), 3.06 - 2.91 (m, 2H), 2.63 - 2.49 (m, 2H); 1.82 (s, 3H); <sup>13</sup>C NMR (75 MHz, DMSO-*d*<sub>6</sub>): 189.3, 127.0, 126.9, 124.4, 124.2, 120.7, 120.1, 119.9, 112.6, 67.8, 47.5, 25.6, 21.3; HRMS (ESI-qTOF) Calcd for C<sub>13</sub>H<sub>12</sub>BrNO [M+H]<sup>+</sup>, 278.0102, Found 278.1061.

**(b) Representative procedure for the synthesis of Carbazolo-1,4-quinone by molecular iodine (3):**

A mixture of molecular iodine ( 0.757 mmol) and substituted 2-bromo-1-oxo-tetrahydrocabazole **2** (0.757 mmol) in DMSO (5 mL) was stirred at 100 °C for appropriate time. The progress of reaction was monitored by thin layer chromatography. The reaction mixture was poured in ice cold saturated solution of sodium thiosulphate and kept at 0 °C for overnight. The solid product was separated out. The crude product was purified by column chromatography using *n*-hexane /ethyl acetate as eluent to afford carbazolo-1,4-quinone (**3**).

**Carbazolo-1,4-quinone (3a)<sup>1</sup>**: 86 mg (58%) as a red solid; mp: 138-140 °C; <sup>1</sup>H NMR (400 MHz, DMSO-*d*<sub>6</sub>): δ 12.01 (s, 1H), 8.08 (d, *J* = 8.0 Hz, 1H), 7.76 (d, *J* = 8.3 Hz, 1H), 7.50 – 7.41 (m, 1H), 7.33 (t, *J* = 7.4 Hz, 1H), 6.26 (s, 2H); <sup>13</sup>C NMR (101 MHz, DMSO-*d*<sub>6</sub>): δ 187.6, 180.8, 152.7, 139.4, 132.9, 127.4, 126.0, 124.8, 123.0, 122.6, 116.9, 112.7; HRMS (ESI-qTOF) Calcd for C<sub>12</sub>H<sub>7</sub>NO<sub>2</sub> [M+H]<sup>+</sup>, 198.0477: found 198.1544.

**6-cyno-carbazolo-1,4-quinone (3b)**: 100 mg (65%) as a red solid; mp: 197-199 °C; <sup>1</sup>H NMR (400 MHz, DMSO-*d*<sub>6</sub>): δ 12.13 (s, 1H), 8.26 (s, 1H), 7.59 (d, *J* = 8.6 Hz, 1H), 7.53 (d, *J* = 8.6 Hz, 1H), 6.45 (s, 2H); <sup>13</sup>C NMR (101 MHz, DMSO-*d*<sub>6</sub>): δ 191.3, 183.4, 139.6, 136.0, 133.3, 129.2, 128.4, 128.0, 125.5, 120.5, 114.5, 109.0, 102.3; HRMS (ESI-qTOF) Calcd for C<sub>13</sub>H<sub>6</sub>N<sub>2</sub>O<sub>2</sub> [M+H]<sup>+</sup>, 223.0429: found 223.0505.

**6-Methylcarboxylate-carbazolo-1,4-quinone (3c)**: 107 mg (68%) as an orange solid; mp: 185-187 °C; mp: decomposed >245 °C; <sup>1</sup>H NMR (300 MHz, DMSO-*d*<sub>6</sub>): δ 12.03 (s, 1H), 8.33 (s, 1H), 7.86 (d, *J* = 8.4 Hz, 1H), 7.45 (d, *J* = 8.7 Hz, 1H), 6.95 (s, 2H), 3.84 (s, 3H); <sup>13</sup>C NMR (75 MHz, DMSO-*d*<sub>6</sub>): δ 192.3, 183.0, 167.1, 141.2, 139.0, 138.9, 132.2, 129.5, 126.8, 125.1, 124.40, 121.7, 113.3, 52.3; HRMS (ESI-qTOF) Calcd for C<sub>14</sub>H<sub>9</sub>NO<sub>4</sub> [M+H]<sup>+</sup>, 256.0532: found 256.0608.

**6-Chloro-carbazolo-1,4-quinone (3d)<sup>1a</sup>**: 94 mg (61%) as a red solid; mp: decomposed >245 °C; <sup>1</sup>H NMR (500 MHz, DMSO-*d*<sub>6</sub>): δ 11.99 (s, 1H), 8.32 (s, 1H), 7.84 (d, *J* = 6.5 Hz, 1H), 7.43 (d, *J* = 9.0 Hz, 1H), 6.79 (s, 2H); <sup>13</sup>C NMR (126 MHz, DMSO-*d*<sub>6</sub>): δ 185.6, 180.2, 139.2, 137.3, 129.6, 127.2, 126.7, 125.0, 121.8, 121.0, 116.1, 115.0; HRMS (ESI-qTOF) Calcd for C<sub>12</sub>H<sub>6</sub>ClNO<sub>2</sub> [M+H]<sup>+</sup>, 232.0087: found 232.0162.

**Murrayaquinone (3e)<sup>1, 2</sup>**: 138 mg (91%) as a red solid; mp: 236-239 °C; <sup>1</sup>H NMR (300 MHz, DMSO-*d*<sub>6</sub>): δ 12.80 (s, 1H), 8.02 (d, *J* = 7.5 Hz, 1H), 7.52 (d, *J* = 7.5 Hz, 1H), 7.39-7.27 (m, 2H), 6.57 (s, 1H), 2.04 (s, 3H); <sup>13</sup>C NMR (75 MHz, DMSO-*d*<sub>6</sub>): δ 183.2, 180.2, 148.4, 136.8,

136.6, 134.6, 132.2, 130.2, 126.1, 116.5, 116.1, 114.6, 16.0; HRMS (ESI-qTOF) Calcd for  $C_{13}H_9NO_2$   $[M+H]^+$ , 212.0633: found 212.0711.

**3,6-Dimethyl-carbazolo-1,4-quinone (3f)<sup>1a, 2</sup>**: 120 mg (78%) as a red solid; mp: 228-230 °C;  $^1H$  NMR (300 MHz, DMSO- $d_6$ ):  $\delta$  12.54 (s, 1H), 7.67 (s, 1H), 7.35 (d,  $J$  = 8.1 Hz, 1H), 7.10 (d,  $J$  = 8.7 Hz, 1H), 6.53 (s, 1H), 1.84 (s, 6H);  $^{13}C$  NMR (75 MHz, DMSO- $d_6$ ):  $\delta$  180.1, 167.5, 149.9, 140.9, 139.2, 135.9, 133.6, 131.9, 128.9, 124.1, 121.1, 116.2, 21.5, 19.1; HRMS (ESI-qTOF) Calcd for  $C_{14}H_{11}NO_2$   $[M+H]^+$ , 226.0790: found 226.0864.

**3-Methyl-6-cyno-carbazolo-1,4-quinone (3g)**: 137 mg (88%) as an orange solid; mp: 181-184 °C;  $^1H$  NMR (500 MHz,  $CDCl_3$ ):  $\delta$  12.70 (s, 1H), 8.41 (s, 1H), 7.51 (d,  $J$  = 8.5 Hz, 1H), 7.41 (d,  $J$  = 9.0 Hz, 1H), 6.40 (s, 1H), 2.05 (s, 3H);  $^{13}C$  NMR (126 MHz,  $CDCl_3$ ):  $\delta$  183.0, 180.1, 148.6, 139.2, 137.7, 131.8, 128.2, 127.9, 123.5, 119.6, 116.2, 114.9, 106.6, 16.0; HRMS (ESI-qTOF) Calcd for  $C_{14}H_8N_2O_2$   $[M+H]^+$ , 237.0586: found 237.0664.

**3-Methylcarboxylate-3-methyl-carbazolo-1,4-quinone (3h)**: 137 mg (86%) as an orange solid; mp: decomposed >229 °C;  $^1H$  NMR (300 MHz, DMSO- $d_6$ ):  $\delta$  13.02 (s, 1H), 8.55 (s, 1H), 7.84 (d,  $J$  = 10.2 Hz, 1H), 7.50 (d,  $J$  = 8.7 Hz, 1H), 6.56 (s, 1H), 3.79 (s, 3H), 1.97 (s, 3H);  $^{13}C$  NMR (75 MHz, DMSO- $d_6$ ):  $\delta$  183.2, 180.2, 166.6, 148.3, 140.0, 137.8, 132.0, 126.8, 125.1, 124.1, 123.3, 116.3, 114.3, 52.4, 15.8; HRMS (ESI-qTOF) Calcd for  $C_{15}H_{11}NO_4$   $[M+H]^+$ , 270.0688: found 270.0756.

**6-Chloro-3-methyl-carbazolo-1,4-quinone (3i)<sup>1a, 2</sup>**: 142 mg (91%) as a red solid; mp: decomposed >253 °C;  $^1H$  NMR (300 MHz, DMSO- $d_6$ ):  $\delta$  12.95 (s, 1H), 7.91 (s, 1H), 7.50 (d,  $J$  = 8.7 Hz, 1H), 7.35 (d,  $J$  = 8.7 Hz, 1H), 6.58 (s, 1H), 2.02 (s, 3H);  $^{13}C$  NMR (75 MHz, DMSO- $d_6$ ):  $\delta$  185.0, 174.1, 139.2, 135.8, 132.6, 127.8, 127.8, 127.4, 124.8, 120.0, 117.0, 113.9, 20.9; HRMS (ESI-qTOF) Calcd for  $C_{13}H_8ClNO_2$   $[M+H]^+$ , 246.0244: found 246.0320.



**6-Bromo-3-methyl-carbazolo-1,4-quinone (3j)** <sup>1a</sup>: 146 mg (90%) as a red solid; mp: 253-255 °C; <sup>1</sup>H NMR (300 MHz, DMSO-*d*<sub>6</sub>): δ 12.83 (s, 1H), 8.06 (s, 1H), 7.53 (d, *J* = 8.1 Hz, 1H), 7.32 (d, *J* = 7.8 Hz, 1H), 6.61 (s, 1H), 2.06 (s, 3H); <sup>13</sup>C NMR (75 MHz, DMSO-*d*<sub>6</sub>): δ 184.4, 174.2, 140.2, 136.3, 132.3, 130.3, 128.6, 126.2, 124.7, 123.9, 121.0, 112.7, 18.6; HRMS (ESI-qTOF) Calcd for C<sub>13</sub>H<sub>8</sub>BrNO<sub>2</sub> [M+H]<sup>+</sup>, 289.9738: found 289.9817.

**6,8-Dichloro-3-methyl-carbazolo-1,4-quinone (3k)**: 143 mg (89%) as a red solid; mp 240-244 °C; <sup>1</sup>H NMR (300 MHz, DMSO-*d*<sub>6</sub>): δ 13.49 (s, 1H), 7.96 (s, 1H), 7.60 (s, 1H), 6.69 (s, 1H), 2.07 (s, 3H); <sup>13</sup>C NMR (75 MHz, DMSO-*d*<sub>6</sub>): δ 185.1, 179.9, 148.2, 143.8, 138.2, 134.8, 132.6, 130.7, 128.7, 126.0, 120.5, 119.9, 18.9; HRMS (ESI-qTOF) Calcd for C<sub>13</sub>H<sub>7</sub>Cl<sub>2</sub>NO<sub>2</sub> [M+H]<sup>+</sup>, 279.9854: found 279.9930.

**9-Propyl-3-methyl-carbazolo-1,4-quinone (3l)**: 109 mg (69%) as a red solid; mp: 156-160 °C; <sup>1</sup>H NMR (400 MHz, DMSO-*d*<sub>6</sub>): δ 8.19 (d, *J* = 2.8 Hz, 1H), 7.81 (d, *J* = 9.2 Hz, 1H), 7.72-7.65 (m, 1H), 7.58 (d, *J* = 8.8 Hz, 1H), 6.62 (d, *J* = 1.6 Hz, 1H), 4.53 (t, *J*<sub>1</sub> = 6.8 Hz, *J*<sub>2</sub> = 7.2 Hz, 2H), 2.05 (d, *J* = 1.6 Hz, 3H), 1.78-1.71 (m, 2H), 0.85 (t, *J* = 6.8 Hz, 3H); <sup>13</sup>C NMR (101 MHz, DMSO-*d*<sub>6</sub>): δ 183.1, 180.8, 147.4, 137.5, 134.5, 133.2, 129.4, 124.6, 124.1, 117.5, 115.4, 115.1, 46.3, 23.3, 15.6, 11.3; <sup>13</sup>C NMR (DEPT) (101 MHz, DMSO-*d*<sub>6</sub>): δ 134.5, 133.2, 129.4, 124.1, 115.1, 46.3, 23.3, 15.6, 11.3; HRMS (ESI-qTOF) Calcd for C<sub>16</sub>H<sub>15</sub>NO<sub>2</sub> [M+H]<sup>+</sup>, 254.1103: found 254.1172.

**9-Propyl-carbazolo-1,4-quinone (3m)**: 89 mg (57%) as a red solid; mp: decomposed >235 °C; <sup>1</sup>H NMR (400 MHz, DMSO-*d*<sub>6</sub>): δ 8.09 (d, *J* = 8.0 Hz, 1H), 7.81 (d, *J* = 8.4 Hz, 1H), 7.45 (t, *J*<sub>1</sub> = 7.2 Hz, *J*<sub>2</sub> = 8.4 Hz, 1H), 7.33 (t, *J*<sub>1</sub> = 7.2 Hz, *J*<sub>2</sub> = 7.6 Hz, 1H), 6.25 (s, 2H), 4.52 (t, *J*<sub>1</sub> = 7.2 Hz, *J*<sub>2</sub> = 7.2 Hz, 2H), 1.79-1.70 (m, 2H), 0.87 (t, *J*<sub>1</sub> = 7.6 Hz, *J*<sub>2</sub> = 6.8 Hz, 3H); <sup>13</sup>C NMR (101 MHz, DMSO-*d*<sub>6</sub>): δ 180.8, 177.1, 152.7, 139.4, 132.9, 127.4, 126.0, 124.8, 123.0, 122.6, 116.9, 112.7,

46.3, 23.4, 11.4.;  $^{13}\text{C}$  NMR (DEPT) (101 MHz, DMSO- $d_6$ ):  $\delta$  127.4, 126.0, 124.8, 123.0, 122.6, 112.7, 46.3, 23.4, 11.4; HRMS (ESI-qTOF) Calcd for  $\text{C}_{15}\text{H}_{13}\text{NO}_2$   $[\text{M}+\text{H}]^+$ , 240.0946: found 240.1022.

**9-Benzyl-carbazolo-1,4-quinone (3n)<sup>3</sup>**: 102 mg (61%) as a red solid; decomposed  $>247$  °C  $^1\text{H}$  NMR (400 MHz, DMSO- $d_6$ ):  $\delta$  8.07 (d,  $J = 7.6$  Hz, 1H), 7.71 (d,  $J = 8.4$  Hz, 1H), 7.68, 7.44-7.33 (m, 3H), 7.27-7.20 (m, 4H), 7.16 (d,  $J = 7.2$  Hz, 2H), 5.86 (s, 2H);  $^{13}\text{C}$  NMR (101 MHz, DMSO- $d_6$ ):  $\delta$  181.2, 173.1, 140.9, 140.2, 139.4, 139.2, 137.1, 136.7, 129.1, 129.0, 128.0, 127.9, 127.2, 125.5, 122.6, 120.7, 119.1, 113.1, 48.1;  $^{13}\text{C}$  NMR (DEPT) (101 MHz, DMSO- $d_6$ ):  $\delta$  139.4, 139.2, 129.1, 129.0, 128.0, 127.9, 127.2, 125.5, 122.6, 120.7, 113.1, 48.1; HRMS (ESI-qTOF) Calcd for  $\text{C}_{19}\text{H}_{13}\text{NO}_2$   $[\text{M}+\text{H}]^+$ , 288.0946: found 288.1023.

**9-Methyl-carbazolo-1,4-quinone (3o)<sup>3</sup>**: 92 mg (61%) as a red solid; mp: 121-125°C;  $^1\text{H}$  NMR (500 MHz,  $\text{CDCl}_3$ ):  $\delta$  8.10 (d,  $J = 7.5$  Hz, 1H), 7.97 (d,  $J = 7.5$  Hz, 1H), 7.60 – 7.54 (m, 1H), 7.50 – 7.42 (m, 1H), 6.30 (s, 2H), 2.19 (s, 3H);  $^{13}\text{C}$  NMR (101 MHz,  $\text{CDCl}_3$ ):  $\delta$  191.5, 181.3, 145.0, 136.0, 132.7, 130.9, 128.4, 127.9, 127.0, 125.6, 124.9, 117.0, 21.9; HRMS (ESI-qTOF) Calcd for  $\text{C}_{13}\text{H}_9\text{NO}_2$   $[\text{M}+\text{H}]^+$ , 212.0633: found 212.0710.

## (b) Isotope Labeling Experiment:

### Method for preparation of $^{18}\text{O}$ labeled DMSO

The  $^{18}\text{O}$ -DMSO was prepared according to the literature<sup>4</sup>

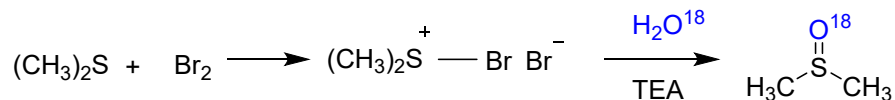

Step I: Bromine (1.8 mL, 33 mmol) was added dropwise over 40 min to a vigorously stirred, ice-cooled solution of dimethyl sulfide (2.43 mL, 33 mmol) in carbon tetrachloride (30 mL).

The resulting yellowish precipitate were removed by filtration and washed with cold chloroform to remove unreacted bromine. After removing the solvent on rotator evaporator under reduced pressure at room temperature, 71% (5.2 g) of yellow solid product was obtained. (*Avoid heating dimethylsulfur dibromide, it may cause brominating side products of dimethyl sulfide*).

Step II : Solid dimethylsulfur dibromide (5.0 g, 22.5 mmoles) was added portion wise over 15 min to a vigorously stirred solution of triethylamine (6.3 ml, 45 mmoles, freshly distilled from sodium hydroxide) and  $^{18}\text{O}$ -labeled water (97 atom %  $^{18}\text{O}$ ) (0.20 ml, 11 mmoles) in 15 ml of tetrahydrofuran (freshly distilled from sodium metal). The temperature of the reaction was maintained below  $50^\circ\text{C}$  by occasional cooling in ice. The precipitate of triethylamine hydrobromide was removed by centrifugation and washed twice with ether. The combined yellow supernatant and washings were dried on high vacuum pressure pump at room temperature (15 mm) to remove the solvent and the tan residue was distilled in a short path distillation to get 850 mg (97%) of  $^{18}\text{O}$ -labeled DMSO.

Step II

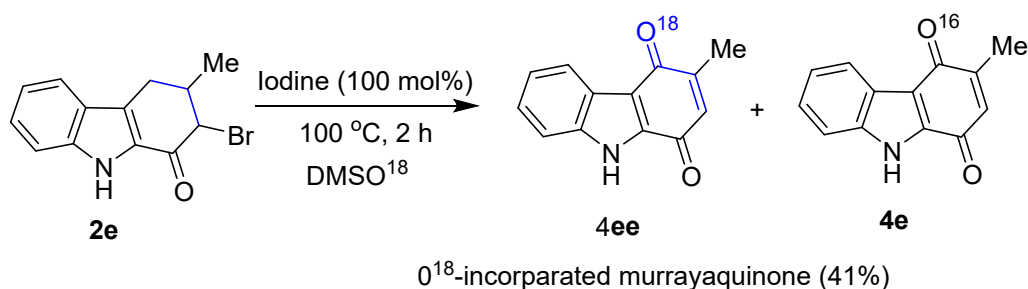

Without further purification the distilled  $^{18}\text{O}$ -labeled DMSO was applied on the oxidation of substrate **2e** under the standard conditions. After 2 h, reaction mixture was poured in cold sodium thiosulphate and purified by column chromatography. The isolated product was subjected to the ESI-MS analysis, a significant amount (42%) of  $^{18}\text{O}$  incorporated oxidized product ( $\text{M}+\text{H}$ ,  $m/z = 212$ ) along with the unlabeled product ( $\text{M}+\text{H}$ ,  $m/z = 214$ ) was observed.

**Savitribai Phule Pune University - Central Instrumentation Facility**

**Analysis Info**

|               |                                                                           |                  |                         |
|---------------|---------------------------------------------------------------------------|------------------|-------------------------|
| Analysis Name | D:\Data\2016\JUNE\SPPU\CHEMISTRY\PD LOKHANDE\MAHAVIR\MS -21_BC1_01_2814.d | Acquisition Date | 6/7/2016 7:10:08 PM     |
| Method        | dlc-ms350mz_10min_90b.m                                                   | Operator         | CIF                     |
| Sample Name   | MS -21                                                                    | Instrument       | impact HD 1819696.00184 |
| Comment       |                                                                           |                  |                         |

**Acquisition Parameter**

|             |         |                      |          |                  |           |
|-------------|---------|----------------------|----------|------------------|-----------|
| Source Type | ESI     | Ion Polarity         | Positive | Set Nebulizer    | 0.3 Bar   |
| Focus       | Active  | Set Capillary        | 3500 V   | Set Dry Heater   | 200 °C    |
| Scan Begin  | 50 m/z  | Set End Plate Offset | -500 V   | Set Dry Gas      | 4.0 l/min |
| Scan End    | 600 m/z | Set Charging Voltage | 2000 V   | Set Divert Valve | Waste     |
|             |         | Set Corona           | 0 nA     | Set APCI Heater  | 0 °C      |

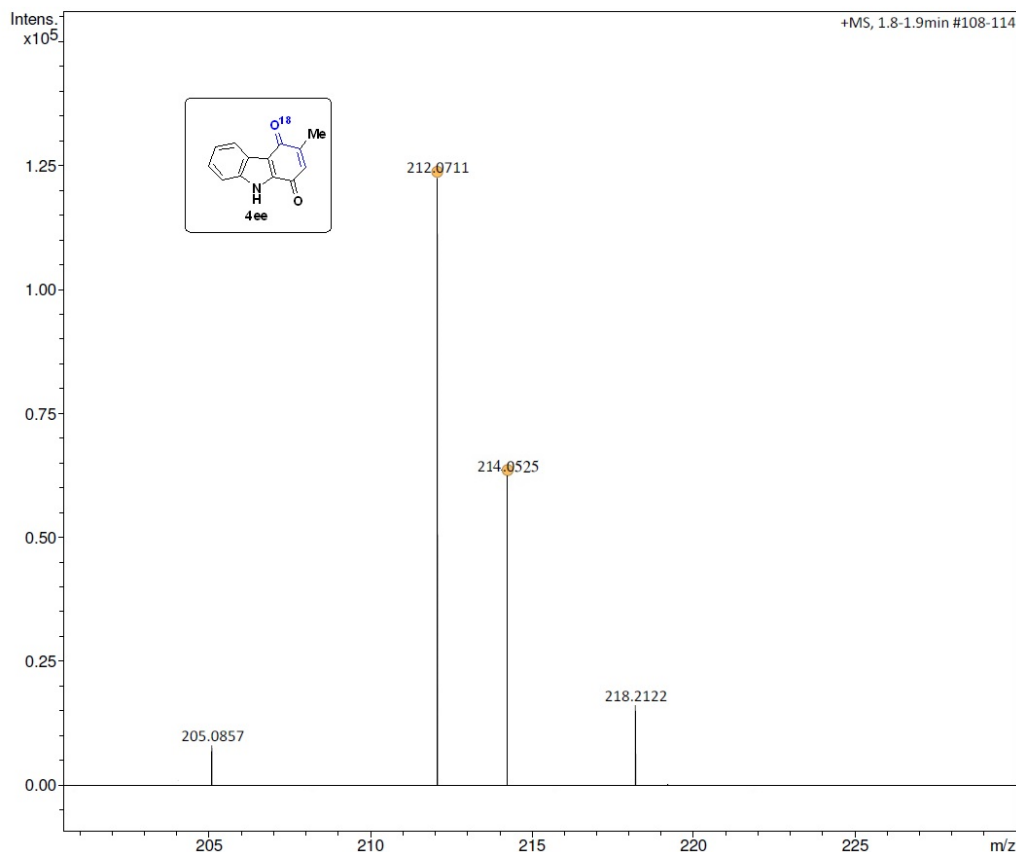

| Meas. m/z | # | Ion Formula | m/z      | err [ppm] | mSigma | # mSigma | Score  | rdb | e <sup>-</sup> | Conf | N-Rule | Adduct |
|-----------|---|-------------|----------|-----------|--------|----------|--------|-----|----------------|------|--------|--------|
| 212.0711  | 1 | C13H10NO2   | 212.0706 | -2.5      | 4.8    | 1        | 100.00 | 9.5 | even           |      | ok     | M+H    |
| 214.0524  | 1 | C13H10NO2   | 214.0525 | 0.4       | 73.9   | 1        | 100.00 | 9.5 | even           |      | ok     | M+H    |

## Computational Details

All the DFT calculations were carried out using the Turbomole 6.0 suite of programs.<sup>5</sup> Geometry optimizations were performed using dispersion corrected Perdew, Burke, and Erzenhof density functional (PBE).<sup>6</sup> The TZVP basis set was employed for the calculations.<sup>7</sup> The resolution of identity (ri), along with the multipole accelerated resolution of identity (marij) approximations

were employed for an accurate and efficient treatment of the electronic Coulomb term in the density functional calculations. Solvent effects were incorporated with the COSMO model,<sup>8</sup> with  $\epsilon = 46.7$  for DMSO. The contributions of internal energy and entropy were obtained from frequency calculations done on the DFT structures at 298.15 K. Therefore, the energies reported in the figures are the  $\Delta G$  values. It was ensured that the obtained transition state structures possessed only one imaginary frequency corresponding to the correct normal mode.

The conversion of **2e** to **4e** has been investigated with density functional theory (DFT). The role molecular iodine could be justified in the conversion of **2e** to **4e** in two important steps; (a) for the elimination of HBr and, (b) I<sub>2</sub>/DMSO-mediated oxidation. In order to explore these two steps, four different conformations of **2e** were considered as shown in Figure 1. The lowest energy conformation **2ea** has been considered as a starting reactant.

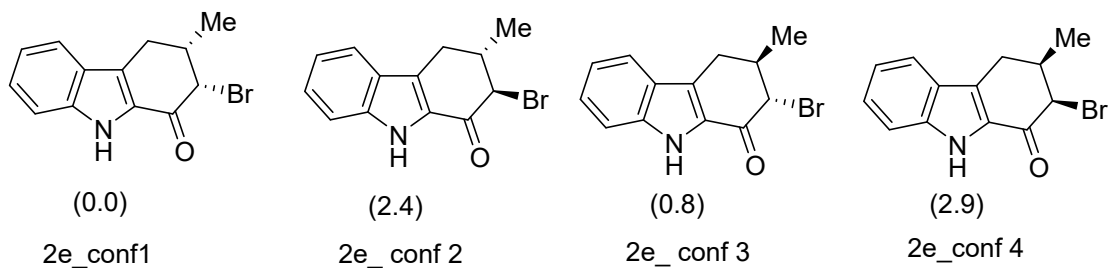

**Figure 1.** Different possible conformations for **2e** and the values in the bracket represent the energies in kcal/mol.

The free energy profile diagram shows that the interaction of molecular iodine with **2e** forms **2e\_I<sub>2</sub>**, a complex that is slightly endergonic, by 0.2 kcal/mol. This is because of the interaction of iodine with the *pi*-cloud of the aromatic ring in **2a\_I<sub>2</sub>**. The dissociation of bromine allows the change in conformation of **2e\_I<sub>2</sub>** to **2e\_I<sub>2</sub>** via **TS1** with a barrier of 31.6 kcal/mol. The subsequent HBr elimination is a feasible process via **TS2** with a barrier of 23.1 kcal/mol and leads to the

formation of **c\_I<sub>2</sub>**, which is 4.5 kcal/mol exergonic with respect to **2e**. Thereafter, C(sp<sup>3</sup>)-H oxidation of **c\_I<sub>2</sub>** can occur *via* **TS3** with a barrier of 32.4 kcal/mol, as shown in Figure 2. This is the slowest step of the reaction and generates the cation-anion adduct (**d**). The formation of **4e** from **d** is a feasible process with a barrier of only 9.4 kcal/mol *via* **TS4**. The final product is stable and exergonic by 21.4 kcal/mol with respect to **2e**.

The DFT investigations suggested that the conversion of **2e** to **4e** occurs in two steps: HBr elimination followed by activation of C(sp<sup>3</sup>)-H bond by molecular iodine in DMSO. The oxidation step is the rate limiting step with a barrier of 32.4 kcal/mol.

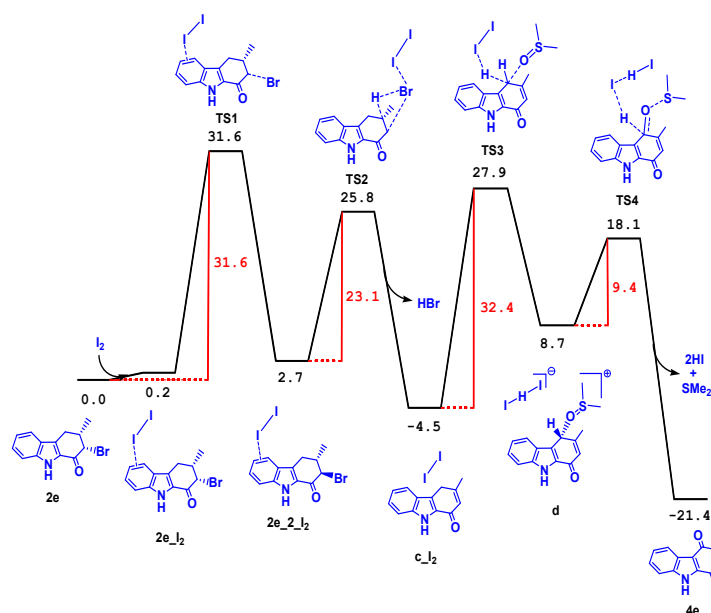

**Figure 2.** The free energy profile diagram for the conversion of **2a** to **4**; energy values are in kcal/mol.

### References:

- (a) Chakraborty, S.; Chattopadhyay, G.; Saha, C. *J. Heterocyclic Chem.* 2011, **48**, 331. (b) Fujii, M.; Nishiyama, T.; Choshi, T.; Satsuki, N.; Fujiwaki, T.; Abe, T.; Ishikura M.; Hibino, S. *Tetrahedron* 2014, **70**, 1805. (c) Paul, H. B.; Christina, L. L. C.; Maurice, L. G.; Geoffrey, D. S.; Paul W. *Bioorg. Med. Chem. Lett.* 2007, **17**, 82.

2. Itoigawa, M.; Kashiwada, Y.; Ito, C.; Furukawa, H.; Tachibana, Y.; Bastow, K.; Lee, K. -H. *J. Nat. Prod.* 2000, **63**, 893.
3. Bouaziz, Z.; Ghe'ardi, A.; Re'gnier, F.; Sarciron, M. -E.; Bertheau, X.; Fenet, B.; Walchshofer N.; Fillion, H. *Eur. J. Org. Chem.* 2002, **11**, 1834.
4. Mupparapa, N.; Khan, S.; Battula, S.; Kushwala, M.; Gupta, A. P.; Ahmed, Q. N.; Vishwakarma, R. A. *Org. Lett.* 2014, **16**, 1154.
5. Ahlrichs, R.; Bär, M.; Häser, M.; Horn, H.; Kölmel, C. *Chem. Phys. Lett.* 1989, **162**, 165.
6. Perdew, J. P.; Burke, K.; Ernzerhof, M. *Phys. Rev. Lett.* 1997, **77**, 3865.
7. Weigend, F. *Phys. Chem. Chem. Phys.* 2002, **4**, 4285.
8. Klamt, A. *J. Phys. Chem.* 1995, **99**, 2224.

**Table S1.** Optimized geometries for different intermediate and transition states investigated in the present study.

| Intermediate/ TSs | Optimize Geometry                                                                    |
|-------------------|--------------------------------------------------------------------------------------|
| 2a                | 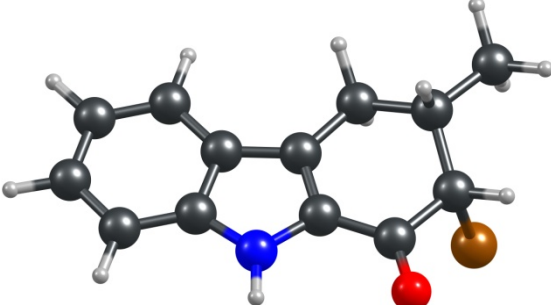   |
| 2a_I <sub>2</sub> |   |
| TS1               |  |
| 2b_I <sub>2</sub> |  |



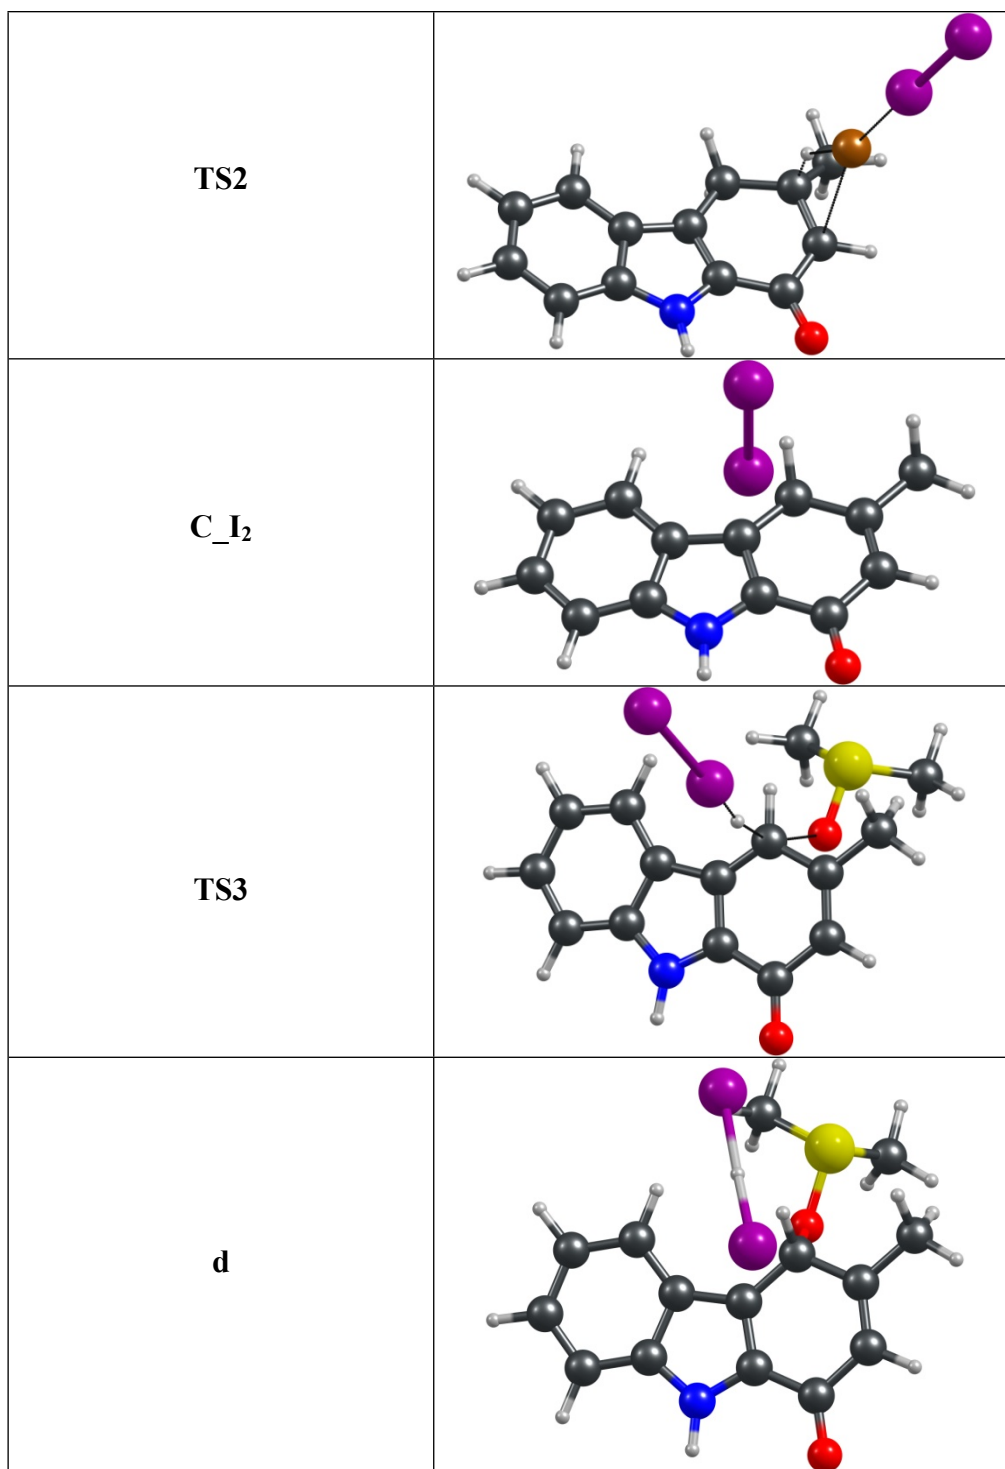

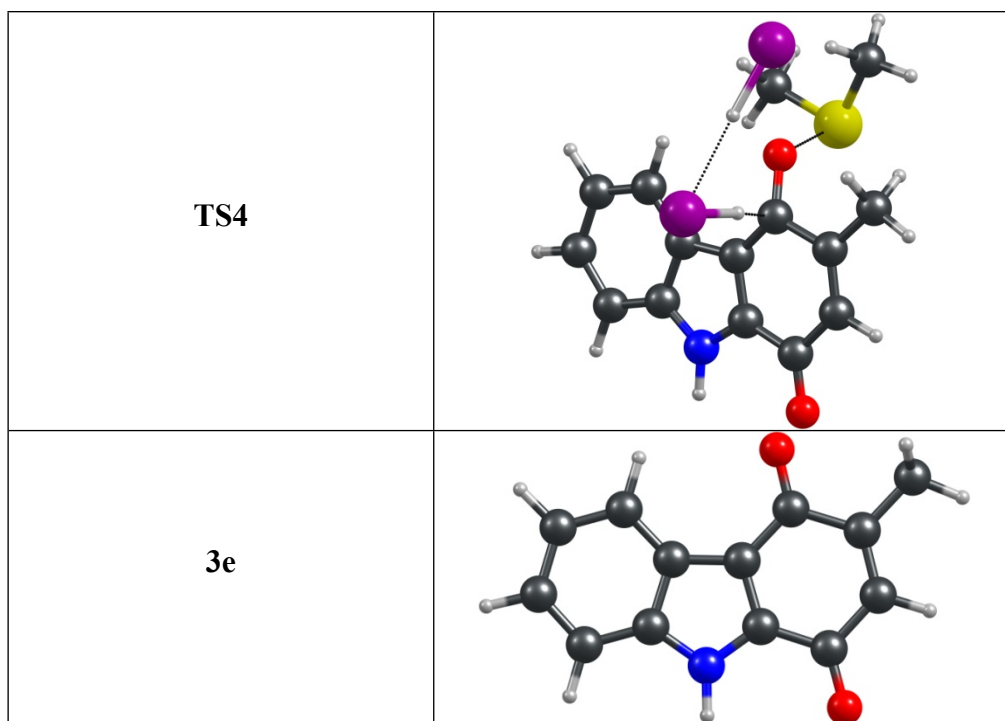

**Cartesian Coordinates:****2a**

C -1.125 6.290 -2.459  
C -0.685 5.335 -1.530  
C 0.659 5.334 -1.023  
C 1.566 6.323 -1.463  
C 1.127 7.266 -2.384  
C -0.203 7.247 -2.875  
C 0.759 4.241 -0.114  
C -0.493 3.621 -0.101  
N -1.357 4.290 -0.950  
C 1.896 3.754 0.718  
C 1.387 2.907 1.898  
C 0.345 1.879 1.461  
C -0.833 2.461 0.679  
O -1.964 1.955 0.728  
H 0.809 3.582 2.560  
Br 1.139 0.476 0.233  
H -2.149 6.282 -2.838  
H -0.512 8.004 -3.599  
H 1.813 8.037 -2.741  
H 2.591 6.340 -1.088  
H 2.576 3.133 0.105  
H 2.494 4.596 1.099  
C 2.528 2.299 2.708  
H -2.325 4.026 -1.114  
H -0.028 1.289 2.306  
H 2.141 1.721 3.562  
H 3.133 1.628 2.080  
H 3.181 3.096 3.093

**2b**

C -1.008 2.369 0.566  
C -0.674 3.568 -0.160  
C 0.570 4.195 -0.155  
C 1.705 3.666 0.649  
C 1.207 2.815 1.842  
C 0.191 1.779 1.334  
N -1.540 4.245 -1.001  
C -0.876 5.314 -1.547  
C 0.466 5.312 -1.034  
C 1.365 6.320 -1.446  
C 0.919 7.287 -2.338  
C -0.410 7.270 -2.832  
C -1.324 6.294 -2.446  
H 0.680 3.487 2.540

|    |        |       |        |
|----|--------|-------|--------|
| Br | -0.497 | 0.633 | 2.817  |
| O  | -2.126 | 1.841 | 0.520  |
| H  | 0.694  | 1.061 | 0.665  |
| H  | -2.346 | 6.288 | -2.828 |
| H  | -0.724 | 8.045 | -3.534 |
| H  | 1.599  | 8.074 | -2.670 |
| H  | 2.390  | 6.335 | -1.069 |
| H  | 2.360  | 3.039 | 0.017  |
| H  | 2.334  | 4.484 | 1.035  |
| C  | 2.406  | 2.178 | 2.546  |
| H  | -2.508 | 3.983 | -1.165 |
| H  | 2.106  | 1.653 | 3.463  |
| H  | 2.904  | 1.458 | 1.877  |
| H  | 3.134  | 2.959 | 2.814  |

**2c**

|    |        |       |        |
|----|--------|-------|--------|
| C  | -1.101 | 6.259 | -2.489 |
| C  | -0.657 | 5.291 | -1.522 |
| C  | 0.619  | 5.252 | -0.956 |
| C  | 1.674  | 6.252 | -1.294 |
| C  | 1.390  | 6.911 | -2.660 |
| C  | -0.069 | 7.347 | -2.792 |
| N  | -1.419 | 4.240 | -1.039 |
| C  | -0.660 | 3.519 | -0.152 |
| C  | 0.636  | 4.132 | -0.076 |
| C  | 1.617  | 3.575 | 0.772  |
| C  | 1.293  | 2.447 | 1.514  |
| C  | 0.005  | 1.857 | 1.425  |
| C  | -0.984 | 2.378 | 0.597  |
| C  | 1.714  | 5.957 | -3.825 |
| Br | -0.491 | 8.854 | -1.514 |
| O  | -2.212 | 6.240 | -3.042 |
| H  | -1.972 | 1.918 | 0.533  |
| H  | -0.213 | 0.970 | 2.023  |
| H  | 2.035  | 2.003 | 2.180  |
| H  | 2.608  | 4.028 | 0.845  |
| H  | 1.704  | 7.034 | -0.514 |
| H  | 2.669  | 5.782 | -1.309 |
| H  | 2.021  | 7.807 | -2.761 |
| H  | -2.383 | 4.056 | -1.302 |
| H  | 1.487  | 6.429 | -4.793 |
| H  | 2.784  | 5.702 | -3.803 |
| H  | 1.134  | 5.025 | -3.747 |
| H  | -0.278 | 7.783 | -3.776 |

**2d**

|   |        |       |       |
|---|--------|-------|-------|
| C | -0.977 | 2.382 | 0.587 |
|---|--------|-------|-------|

|    |        |       |        |
|----|--------|-------|--------|
| C  | -0.656 | 3.522 | -0.165 |
| C  | 0.635  | 4.146 | -0.083 |
| C  | 1.617  | 3.594 | 0.768  |
| C  | 1.297  | 2.464 | 1.510  |
| C  | 0.012  | 1.868 | 1.420  |
| C  | 0.612  | 5.263 | -0.966 |
| C  | -0.655 | 5.284 | -1.546 |
| N  | -1.414 | 4.233 | -1.060 |
| C  | 1.651  | 6.280 | -1.307 |
| C  | 1.385  | 6.883 | -2.711 |
| C  | -0.077 | 7.362 | -2.747 |
| C  | -1.110 | 6.243 | -2.526 |
| O  | -2.218 | 6.190 | -3.070 |
| C  | 1.723  | 5.882 | -3.819 |
| H  | -0.232 | 8.105 | -1.949 |
| H  | -1.963 | 1.918 | 0.521  |
| H  | -0.204 | 0.983 | 2.021  |
| H  | 2.041  | 2.023 | 2.176  |
| H  | 2.606  | 4.052 | 0.841  |
| H  | 1.642  | 7.091 | -0.557 |
| H  | 2.659  | 5.838 | -1.286 |
| H  | 2.022  | 7.772 | -2.821 |
| H  | -2.372 | 4.035 | -1.337 |
| H  | 1.533  | 6.315 | -4.812 |
| H  | 2.786  | 5.607 | -3.756 |
| H  | 1.124  | 4.963 | -3.720 |
| Br | -0.484 | 8.381 | -4.405 |

### 2a\_I<sub>2</sub>

|    |        |       |        |
|----|--------|-------|--------|
| C  | -0.861 | 2.571 | 0.777  |
| C  | -0.478 | 3.684 | -0.058 |
| C  | 0.812  | 4.210 | -0.153 |
| C  | 1.952  | 3.668 | 0.637  |
| C  | 1.442  | 2.901 | 1.871  |
| C  | 0.312  | 1.933 | 1.520  |
| N  | -1.338 | 4.402 | -0.870 |
| C  | -0.631 | 5.386 | -1.501 |
| C  | 0.734  | 5.291 | -1.074 |
| C  | 1.676  | 6.217 | -1.570 |
| C  | 1.237  | 7.199 | -2.479 |
| C  | -0.120 | 7.260 | -2.894 |
| C  | -1.064 | 6.362 | -2.418 |
| C  | 2.577  | 2.241 | 2.649  |
| Br | 0.943  | 0.445 | 0.302  |
| O  | -2.020 | 2.155 | 0.896  |
| H  | 0.946  | 3.637 | 2.532  |

|   |        |        |        |
|---|--------|--------|--------|
| H | -2.105 | 6.409  | -2.740 |
| H | -0.419 | 8.029  | -3.607 |
| H | 1.963  | 7.881  | -2.924 |
| H | 2.734  | 6.129  | -1.318 |
| H | 2.551  | 2.980  | 0.013  |
| H | 2.629  | 4.476  | 0.955  |
| H | -2.332 | 4.208  | -0.973 |
| H | -0.057 | 1.400  | 2.403  |
| H | 2.192  | 1.724  | 3.541  |
| H | 3.103  | 1.508  | 2.020  |
| H | 3.302  | 3.003  | 2.973  |
| I | 1.442  | 8.629  | 0.112  |
| I | 1.404  | 10.461 | 2.274  |

### **TS1**

|    |        |        |        |
|----|--------|--------|--------|
| C  | -0.911 | 2.511  | 0.900  |
| C  | -0.579 | 3.674  | 0.106  |
| C  | 0.720  | 4.241  | 0.004  |
| C  | 1.872  | 3.583  | 0.592  |
| C  | 1.517  | 2.667  | 1.768  |
| C  | 0.205  | 2.039  | 1.690  |
| N  | -1.463 | 4.432  | -0.590 |
| C  | -0.800 | 5.512  | -1.150 |
| C  | 0.580  | 5.412  | -0.796 |
| C  | 1.480  | 6.406  | -1.226 |
| C  | 0.975  | 7.477  | -1.981 |
| C  | -0.400 | 7.545  | -2.322 |
| C  | -1.305 | 6.567  | -1.914 |
| C  | 2.654  | 1.738  | 2.200  |
| O  | -2.052 | 1.986  | 0.927  |
| I  | 1.077  | 8.829  | 0.694  |
| I  | 1.034  | 10.384 | 3.013  |
| Br | 2.376  | 1.037  | -1.415 |
| H  | 1.351  | 3.381  | 2.620  |
| H  | -2.362 | 6.624  | -2.176 |
| H  | -0.755 | 8.386  | -2.918 |
| H  | 1.659  | 8.231  | -2.372 |
| H  | 2.544  | 6.338  | -0.997 |
| H  | 2.234  | 2.810  | -0.195 |
| H  | 2.721  | 4.247  | 0.799  |
| H  | -2.463 | 4.243  | -0.647 |
| H  | 0.000  | 1.194  | 2.356  |
| H  | 2.365  | 1.147  | 3.080  |
| H  | 2.888  | 1.057  | 1.367  |
| H  | 3.546  | 2.331  | 2.443  |

### **2b\_I<sub>2</sub>**

|   |        |       |        |
|---|--------|-------|--------|
| C | -1.348 | 6.240 | -2.436 |
|---|--------|-------|--------|

|    |        |        |        |
|----|--------|--------|--------|
| C  | -0.884 | 5.247  | -1.553 |
| C  | 0.444  | 5.266  | -1.012 |
| C  | 1.315  | 6.319  | -1.363 |
| C  | 0.844  | 7.316  | -2.239 |
| C  | -0.474 | 7.265  | -2.767 |
| C  | 0.565  | 4.130  | -0.164 |
| C  | -0.659 | 3.468  | -0.218 |
| N  | -1.525 | 4.147  | -1.058 |
| C  | 1.690  | 3.623  | 0.666  |
| C  | 1.180  | 2.734  | 1.827  |
| C  | 0.213  | 1.675  | 1.268  |
| C  | -0.980 | 2.243  | 0.477  |
| O  | -2.082 | 1.694  | 0.392  |
| C  | 2.375  | 2.125  | 2.560  |
| Br | -0.478 | 0.476  | 2.701  |
| H  | 0.608  | 3.377  | 2.517  |
| H  | 0.760  | 0.992  | 0.597  |
| H  | -2.359 | 6.202  | -2.844 |
| H  | -0.798 | 8.050  | -3.451 |
| H  | 1.525  | 8.099  | -2.576 |
| H  | 2.351  | 6.327  | -1.021 |
| H  | 2.383  | 3.028  | 0.042  |
| H  | 2.279  | 4.453  | 1.085  |
| H  | -2.479 | 3.859  | -1.258 |
| H  | 2.060  | 1.570  | 3.454  |
| H  | 2.920  | 1.436  | 1.894  |
| H  | 3.064  | 2.924  | 2.869  |
| I  | 0.666  | 8.588  | 0.426  |
| I  | 0.250  | 10.247 | 2.685  |

## TS2

|   |        |       |        |
|---|--------|-------|--------|
| C | -1.387 | 2.896 | 0.996  |
| C | -0.948 | 3.917 | 0.160  |
| C | 0.431  | 4.075 | -0.189 |
| C | 1.391  | 3.175 | 0.323  |
| C | 0.955  | 2.154 | 1.159  |
| C | -0.412 | 2.019 | 1.489  |
| C | 0.515  | 5.210 | -1.036 |
| C | -0.814 | 5.694 | -1.189 |
| N | -1.667 | 4.925 | -0.471 |
| C | 1.675  | 5.873 | -1.657 |
| C | 1.296  | 6.870 | -2.761 |
| C | -0.066 | 7.367 | -2.760 |
| C | -1.190 | 6.810 | -2.023 |
| O | -2.352 | 7.267 | -2.111 |
| C | 2.366  | 7.935 | -3.045 |
| H | 1.238  | 6.249 | -3.715 |

H -0.298 8.220 -3.406  
H -2.440 2.782 1.260  
H -0.720 1.206 2.149  
H 1.674 1.443 1.569  
H 2.446 3.282 0.067  
H 2.212 6.451 -0.880  
H 2.407 5.138 -2.026  
H -2.676 5.059 -0.437  
H 2.104 8.518 -3.939  
H 2.455 8.616 -2.187  
H 3.335 7.444 -3.212  
Br -0.243 5.467 -5.428  
I -1.020 4.388 -7.954  
I -1.844 3.301 -10.525

**C\_I<sub>2</sub>**

C -0.811 -0.613 5.000  
C -0.165 -0.311 3.719  
C 1.219 -0.459 3.484  
C 2.092 -1.120 4.495  
C 1.425 -1.342 5.826  
C 0.100 -1.109 6.029  
N -0.798 0.034 2.566  
C 0.132 0.130 1.545  
C 1.414 -0.203 2.081  
C 2.537 -0.216 1.236  
C 2.360 0.117 -0.104  
C 1.087 0.465 -0.611  
C -0.045 0.478 0.202  
C 2.313 -1.841 6.920  
O -2.036 -0.466 5.168  
H -1.028 0.742 -0.190  
H 0.987 0.728 -1.665  
H 3.218 0.115 -0.778  
H 3.525 -0.472 1.625  
H 2.402 -2.111 4.109  
H 3.039 -0.573 4.646  
H -0.343 -1.305 7.009  
H -1.789 0.259 2.502  
H 3.069 -1.075 7.166  
H 1.744 -2.082 7.828  
H 2.870 -2.734 6.590  
I 1.368 2.247 4.486  
I 1.988 4.882 5.381

**TS3**

C -2.790 -0.779 0.743  
C -4.141 -0.211 0.626



|          |        |        |        |
|----------|--------|--------|--------|
| C        | -4.876 | -0.194 | -0.579 |
| C        | -4.289 | -0.701 | -1.741 |
| C        | -2.944 | -1.295 | -1.686 |
| C        | -2.248 | -1.312 | -0.511 |
| N        | -4.880 | 0.340  | 1.609  |
| C        | -6.112 | 0.747  | 1.107  |
| C        | -6.147 | 0.425  | -0.281 |
| C        | -7.286 | 0.736  | -1.029 |
| C        | -8.356 | 1.358  | -0.377 |
| C        | -8.301 | 1.669  | 0.997  |
| C        | -7.176 | 1.367  | 1.766  |
| C        | -2.385 | -1.844 | -2.959 |
| O        | -2.173 | -0.797 | 1.822  |
| I        | -3.304 | 2.231  | -3.373 |
| I        | -2.660 | 5.072  | -5.192 |
| H        | -7.127 | 1.606  | 2.830  |
| H        | -9.155 | 2.156  | 1.469  |
| H        | -9.255 | 1.610  | -0.943 |
| H        | -7.343 | 0.504  | -2.094 |
| H        | -4.845 | -0.750 | -2.676 |
| H        | -3.663 | 0.860  | -2.410 |
| H        | -4.572 | 0.433  | 2.578  |
| H        | -1.251 | -1.753 | -0.463 |
| H        | -2.354 | -1.061 | -3.735 |
| H        | -1.373 | -2.244 | -2.814 |
| H        | -3.036 | -2.646 | -3.344 |
| O        | -5.257 | -2.959 | -1.572 |
| S        | -5.873 | -3.499 | -2.910 |
| C        | -5.474 | -5.282 | -2.958 |
| C        | -7.671 | -3.634 | -2.608 |
| H        | -5.978 | -5.718 | -3.832 |
| H        | -4.385 | -5.362 | -3.065 |
| H        | -5.819 | -5.741 | -2.023 |
| H        | -8.132 | -4.108 | -3.486 |
| H        | -7.826 | -4.229 | -1.699 |
| H        | -8.049 | -2.611 | -2.486 |
| <b>d</b> |        |        |        |
| C        | -6.920 | 1.463  | 1.896  |
| C        | -5.878 | 0.800  | 1.231  |
| C        | -6.010 | 0.336  | -0.119 |
| C        | -7.219 | 0.557  | -0.809 |
| C        | -8.250 | 1.217  | -0.150 |
| C        | -8.103 | 1.660  | 1.188  |
| C        | -4.763 | -0.273 | -0.453 |
| C        | -3.941 | -0.161 | 0.660  |
| N        | -4.611 | 0.483  | 1.668  |

C -4.290 -0.918 -1.693  
C -2.831 -1.326 -1.679  
C -2.068 -1.178 -0.572  
C -2.557 -0.606 0.696  
O -1.835 -0.498 1.704  
C -2.282 -1.879 -2.956  
O -5.147 -2.166 -1.833  
S -5.509 -2.656 -3.391  
C -7.315 -2.569 -3.370  
C -5.275 -4.437 -3.184  
I -6.018 0.886 -4.718  
I -3.055 2.461 -2.710  
H -6.805 1.811 2.924  
H -8.935 2.174 1.672  
H -9.191 1.403 -0.670  
H -7.328 0.246 -1.849  
H -4.496 -0.292 -2.578  
H -4.210 0.711 2.575  
H -1.015 -1.470 -0.589  
H -2.524 -1.215 -3.802  
H -1.193 -2.005 -2.896  
H -2.711 -2.870 -3.188  
H -5.678 -4.908 -4.091  
H -4.196 -4.619 -3.106  
H -5.814 -4.764 -2.286  
H -7.658 -3.101 -4.269  
H -7.681 -3.047 -2.453  
H -7.581 -1.507 -3.435  
H -4.437 1.765 -3.650

#### TS4

C 0.796 -2.237 -0.348  
C 0.207 -1.422 0.704  
C -0.451 -0.213 0.479  
C -0.507 0.363 -0.864  
C 0.001 -0.514 -1.974  
C 0.640 -1.685 -1.701  
N 0.194 -1.711 2.044  
C -0.450 -0.695 2.719  
C -0.859 0.286 1.757  
C -1.503 1.457 2.199  
C -1.743 1.611 3.562  
C -1.352 0.618 4.493  
C -0.699 -0.544 4.089  
O -1.436 1.266 -1.159  
C -0.184 0.000 -3.363  
O 1.377 -3.318 -0.117

S -3.457 0.593 -1.469  
C -3.648 1.739 -2.860  
C -4.125 1.601 -0.123  
I 2.167 2.338 -0.718  
H -0.388 -1.303 4.809  
H -1.560 0.771 5.554  
H -2.240 2.512 3.925  
H -1.794 2.227 1.485  
H 0.533 1.200 -0.800  
H 0.595 -2.550 2.457  
H 1.040 -2.295 -2.515  
H -1.255 0.039 -3.620  
H 0.183 1.037 -3.443  
H 0.332 -0.634 -4.094  
H -4.698 2.058 -2.913  
H -2.977 2.593 -2.695  
H -3.368 1.201 -3.774  
H -5.200 1.751 -0.294  
H -3.959 1.054 0.812  
H -3.594 2.563 -0.110  
H 0.753 3.518 -2.173  
I -0.296 4.321 -3.253  
**4**  
C -0.159 0.324 0.052  
C -0.025 -0.024 1.466  
C 1.197 -0.125 2.130  
C 2.444 0.103 1.425  
C 2.333 0.454 -0.046  
C 1.120 0.552 -0.649  
N -1.044 -0.293 2.333  
C -0.519 -0.575 3.579  
C 0.907 -0.476 3.490  
C 1.687 -0.717 4.637  
C 1.035 -1.047 5.822  
C -0.376 -1.145 5.887  
C -1.175 -0.911 4.771  
C 3.617 0.678 -0.773  
O -1.259 0.420 -0.514  
H -2.262 -0.986 4.817  
H -0.848 -1.411 6.835  
H 1.620 -1.238 6.723  
H 2.774 -0.644 4.587  
H 1.042 0.809 -1.708  
H -2.032 -0.285 2.085  
H 4.236 -0.233 -0.741  
H 3.437 0.957 -1.820

|   |       |       |        |
|---|-------|-------|--------|
| H | 4.207 | 1.465 | -0.278 |
| O | 3.558 | 0.022 | 1.965  |

\*\*\*\*\*

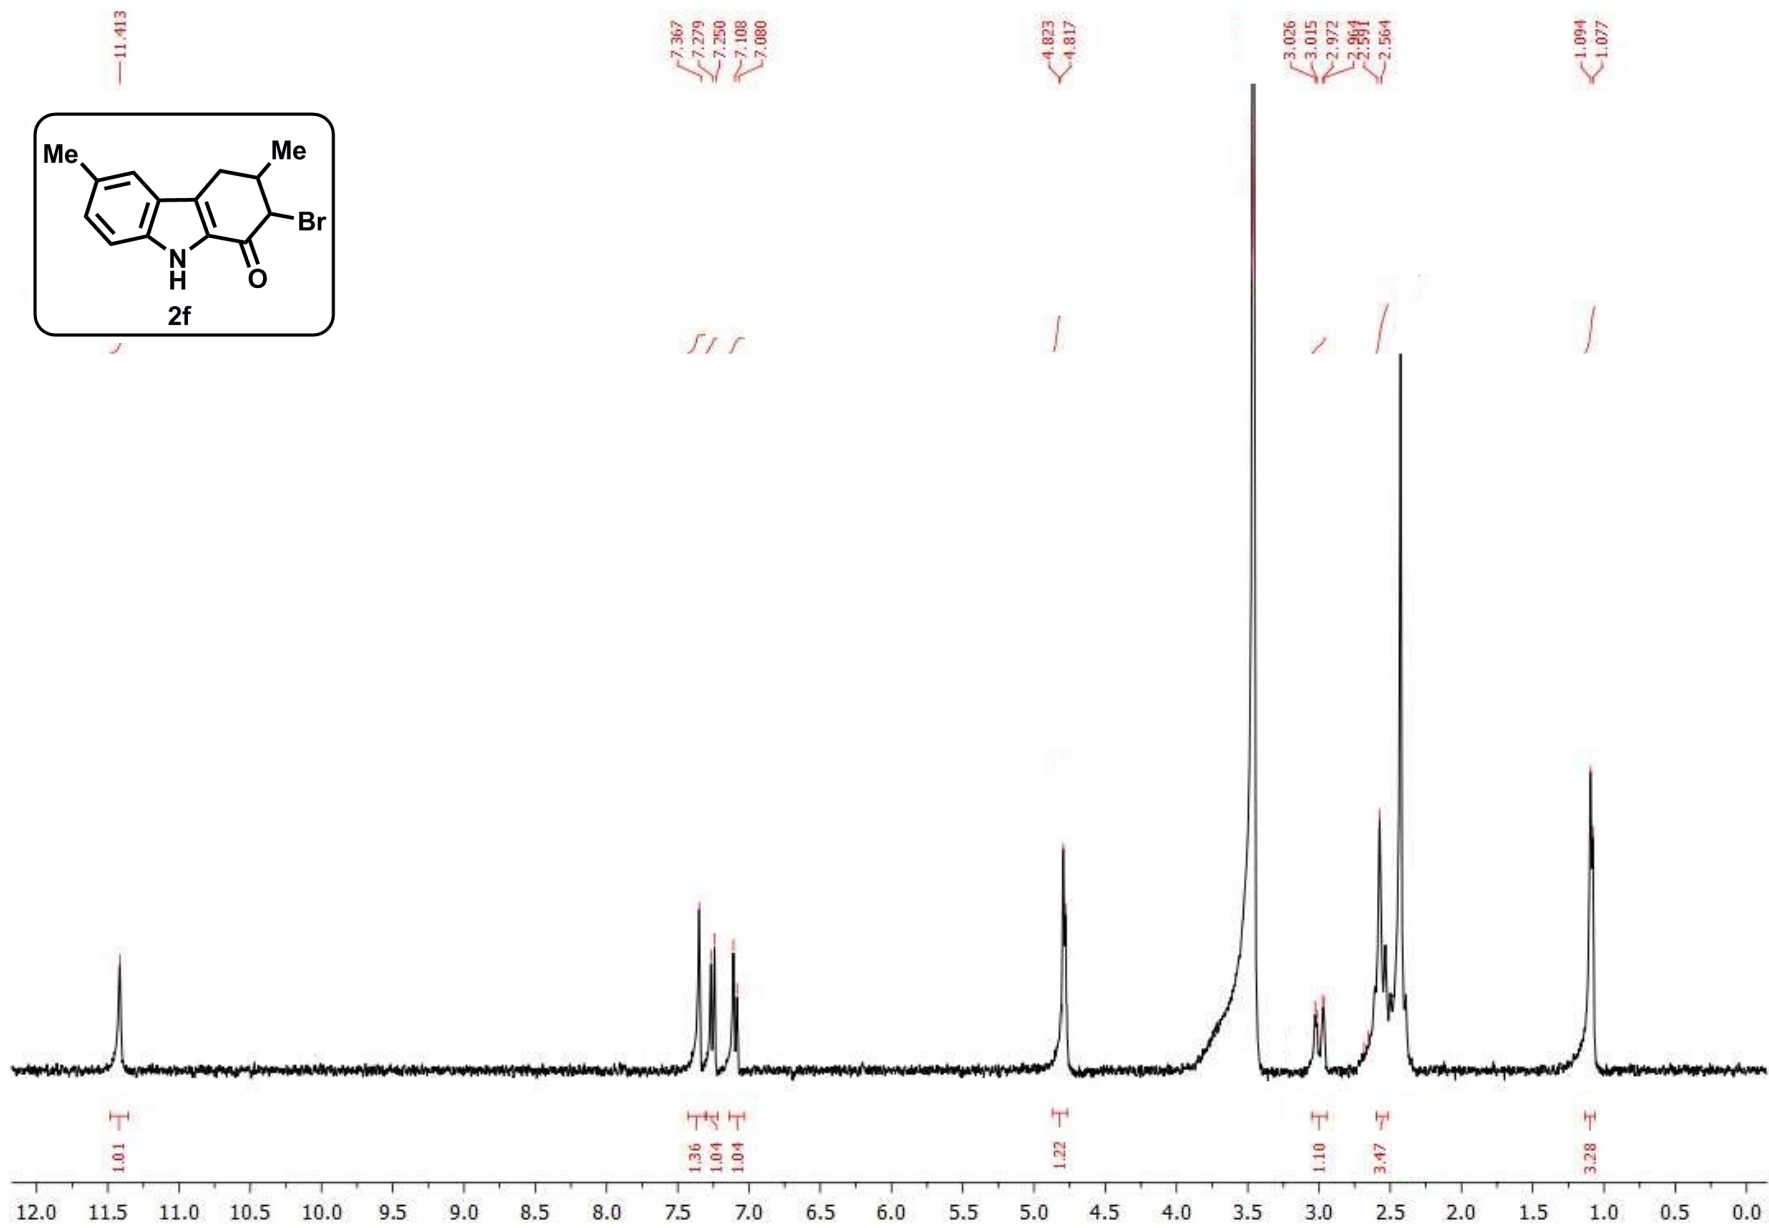

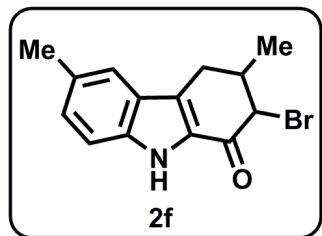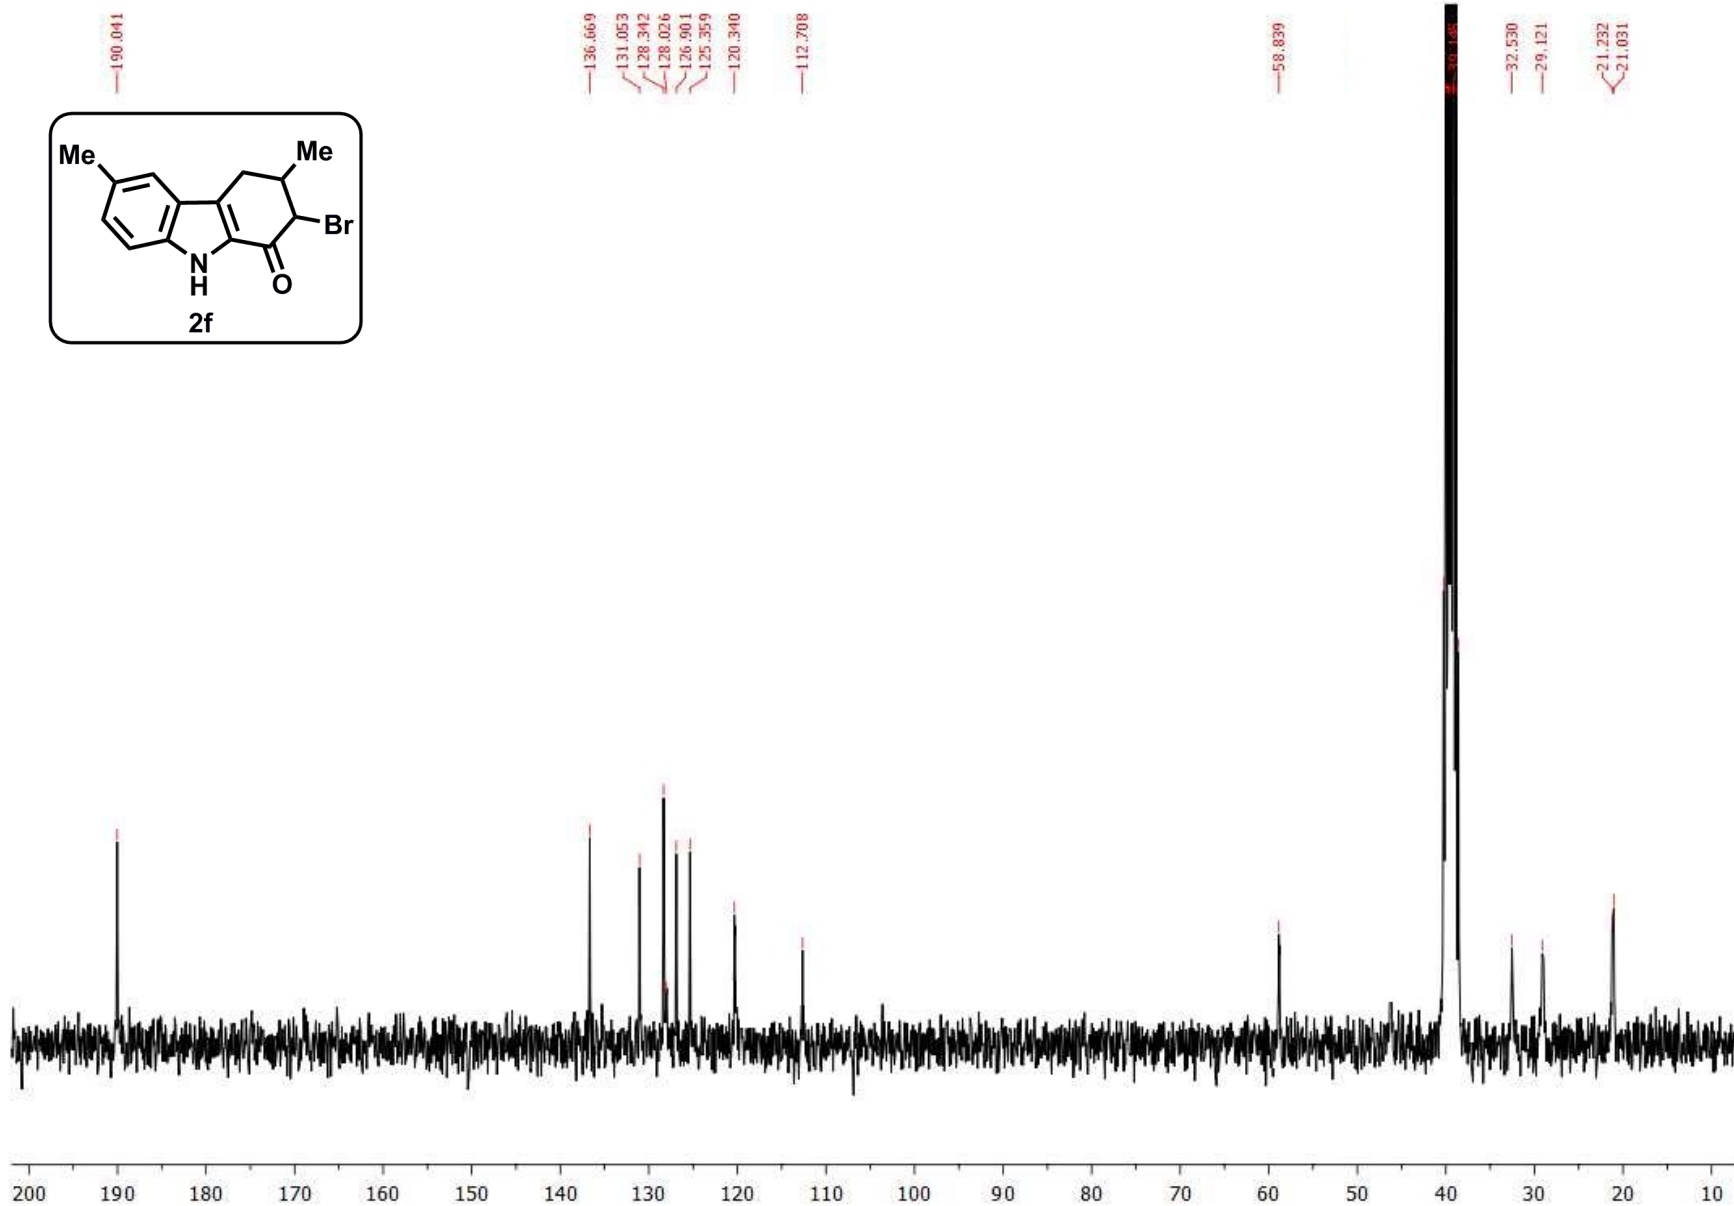

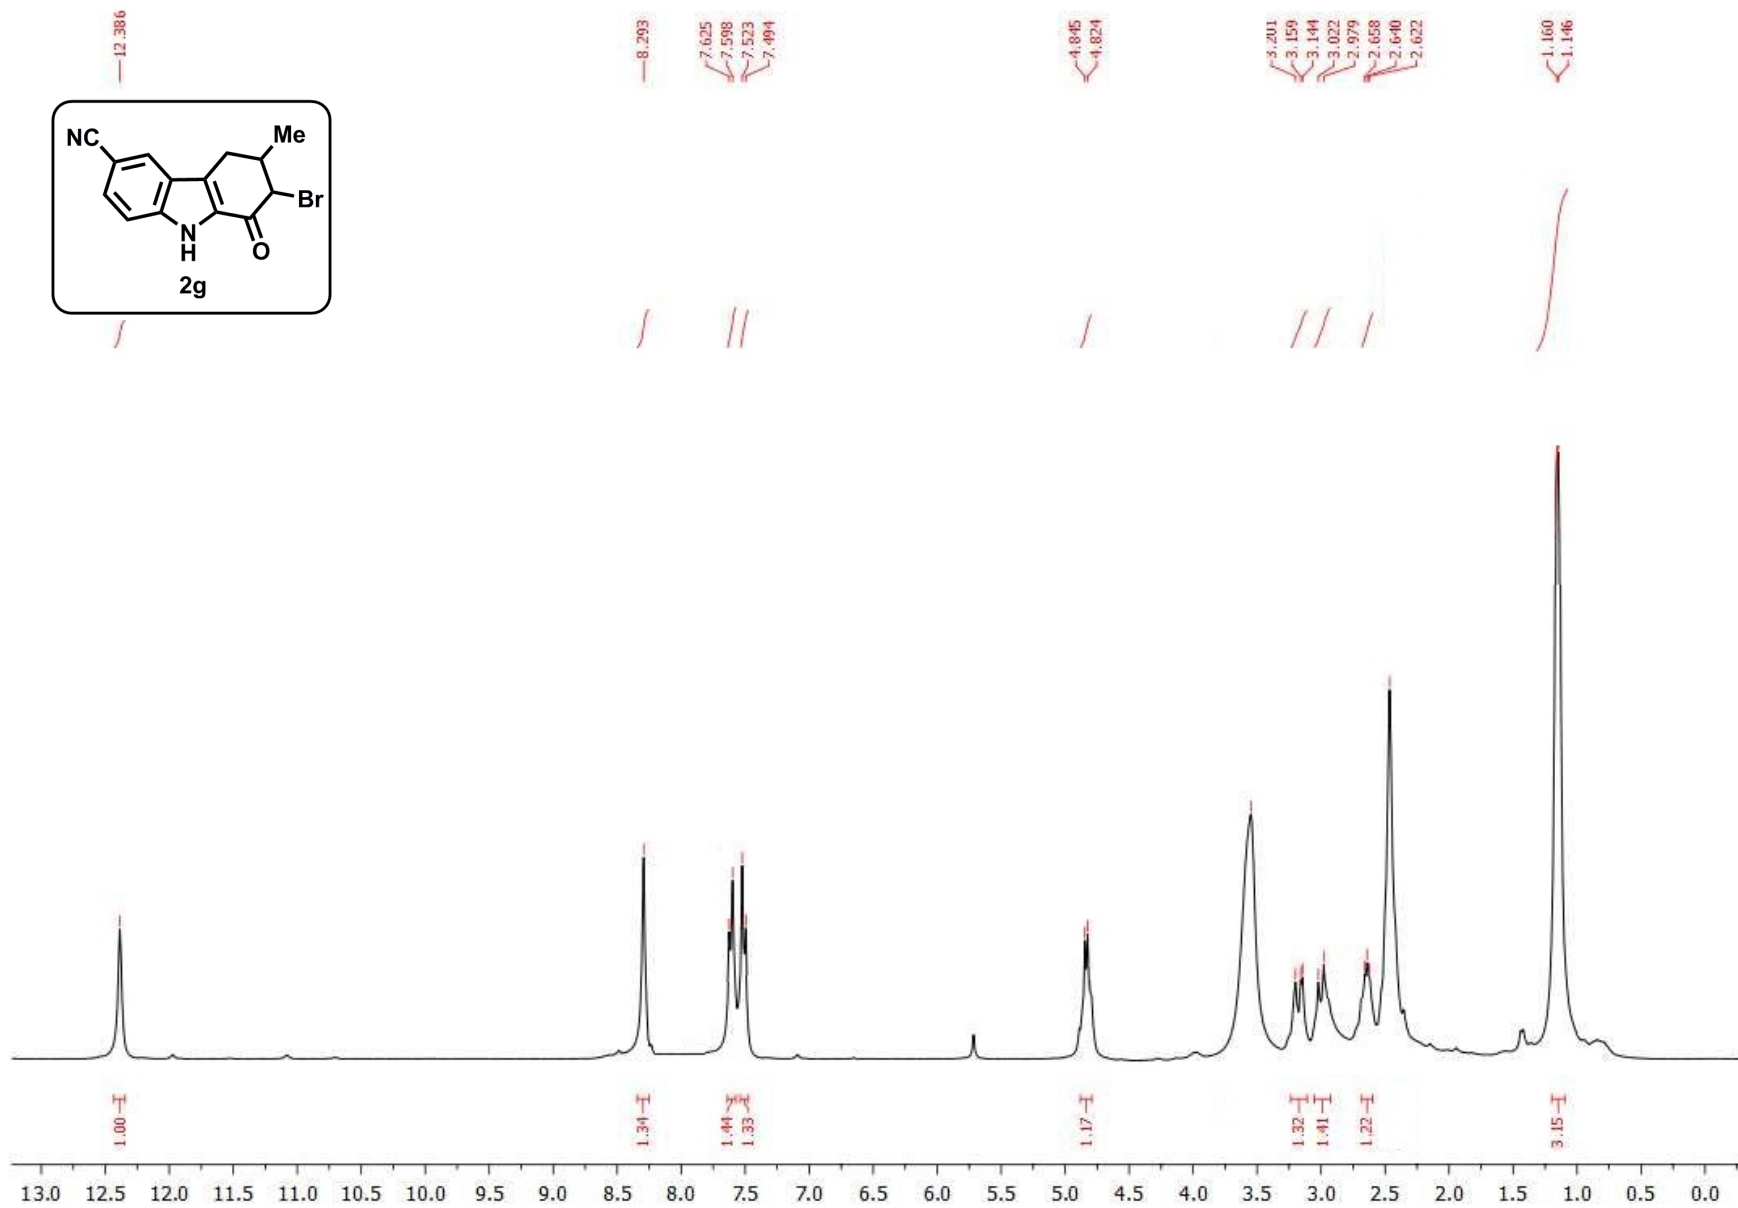

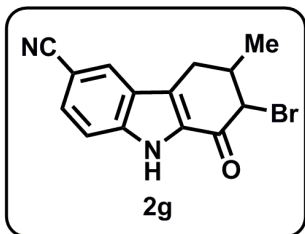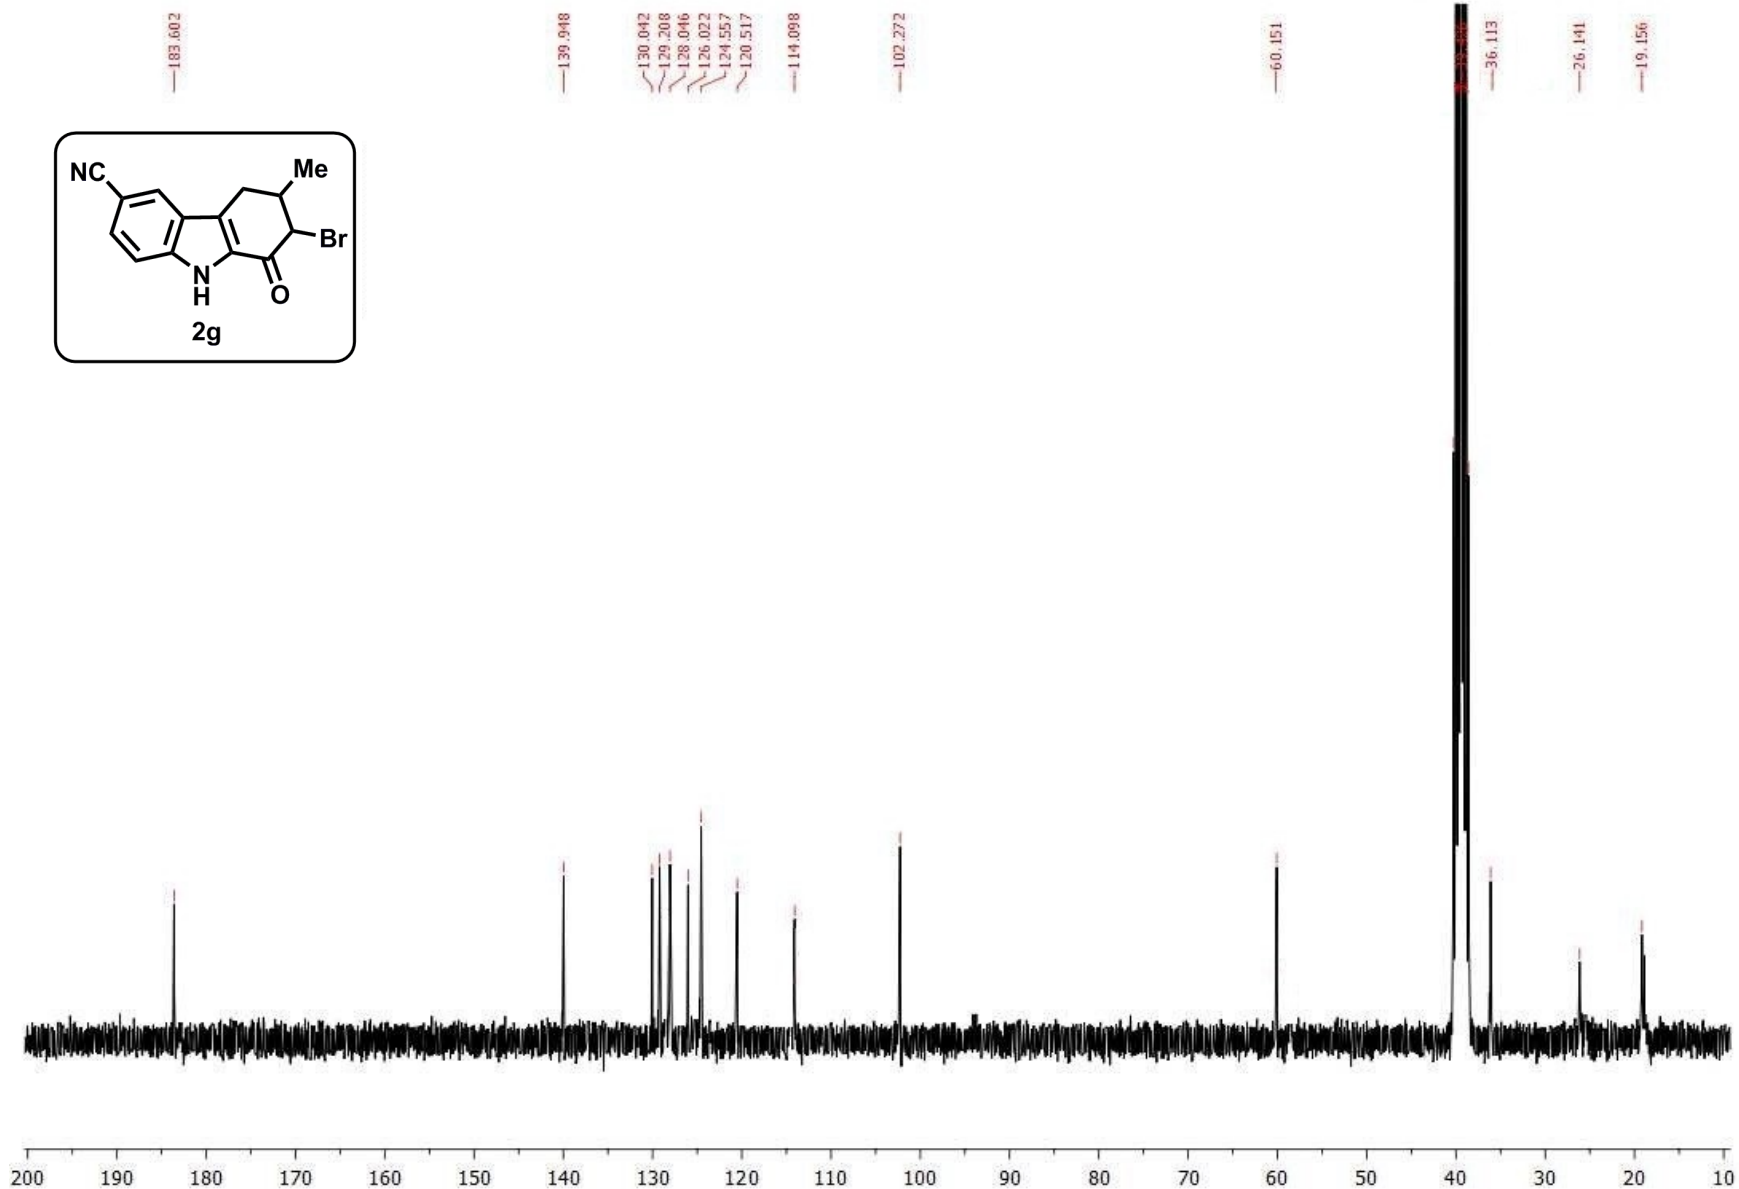



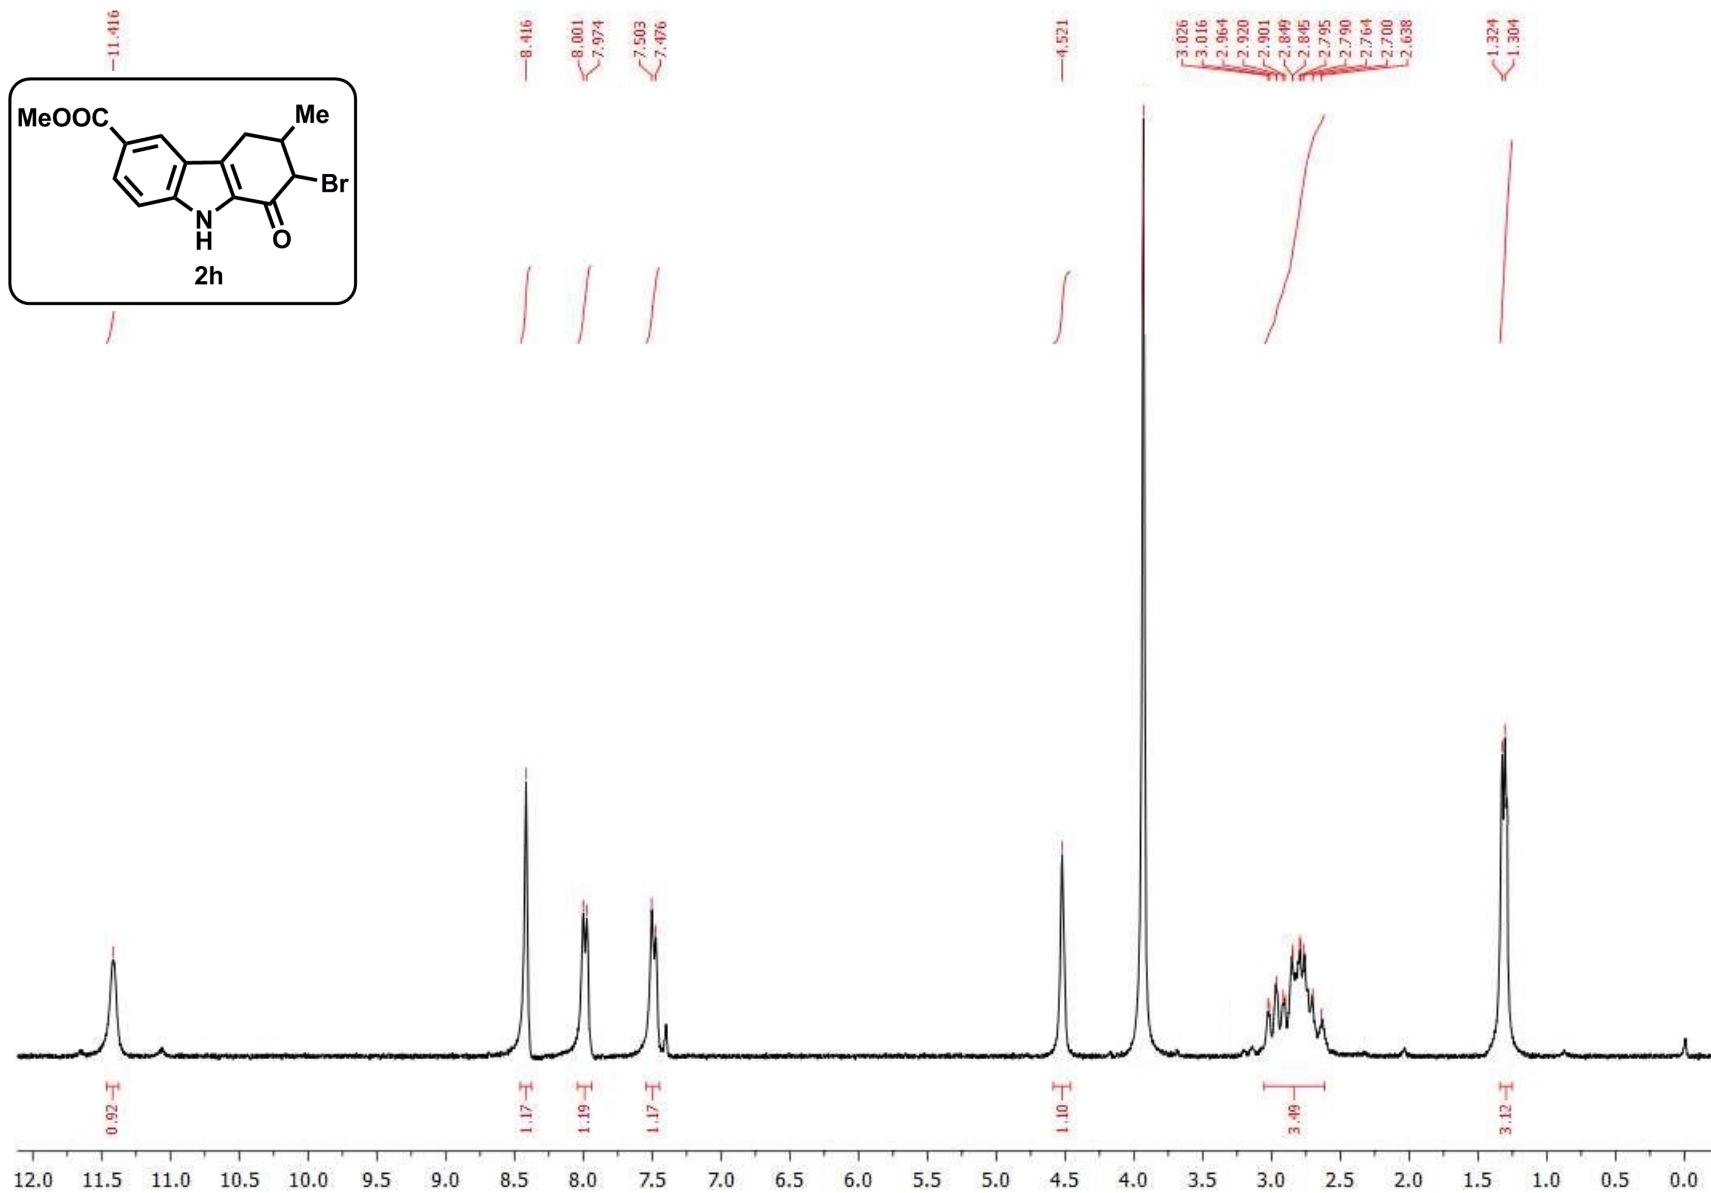

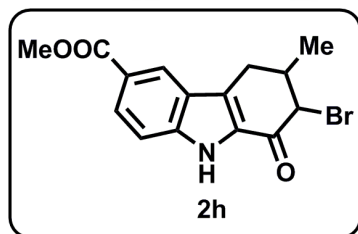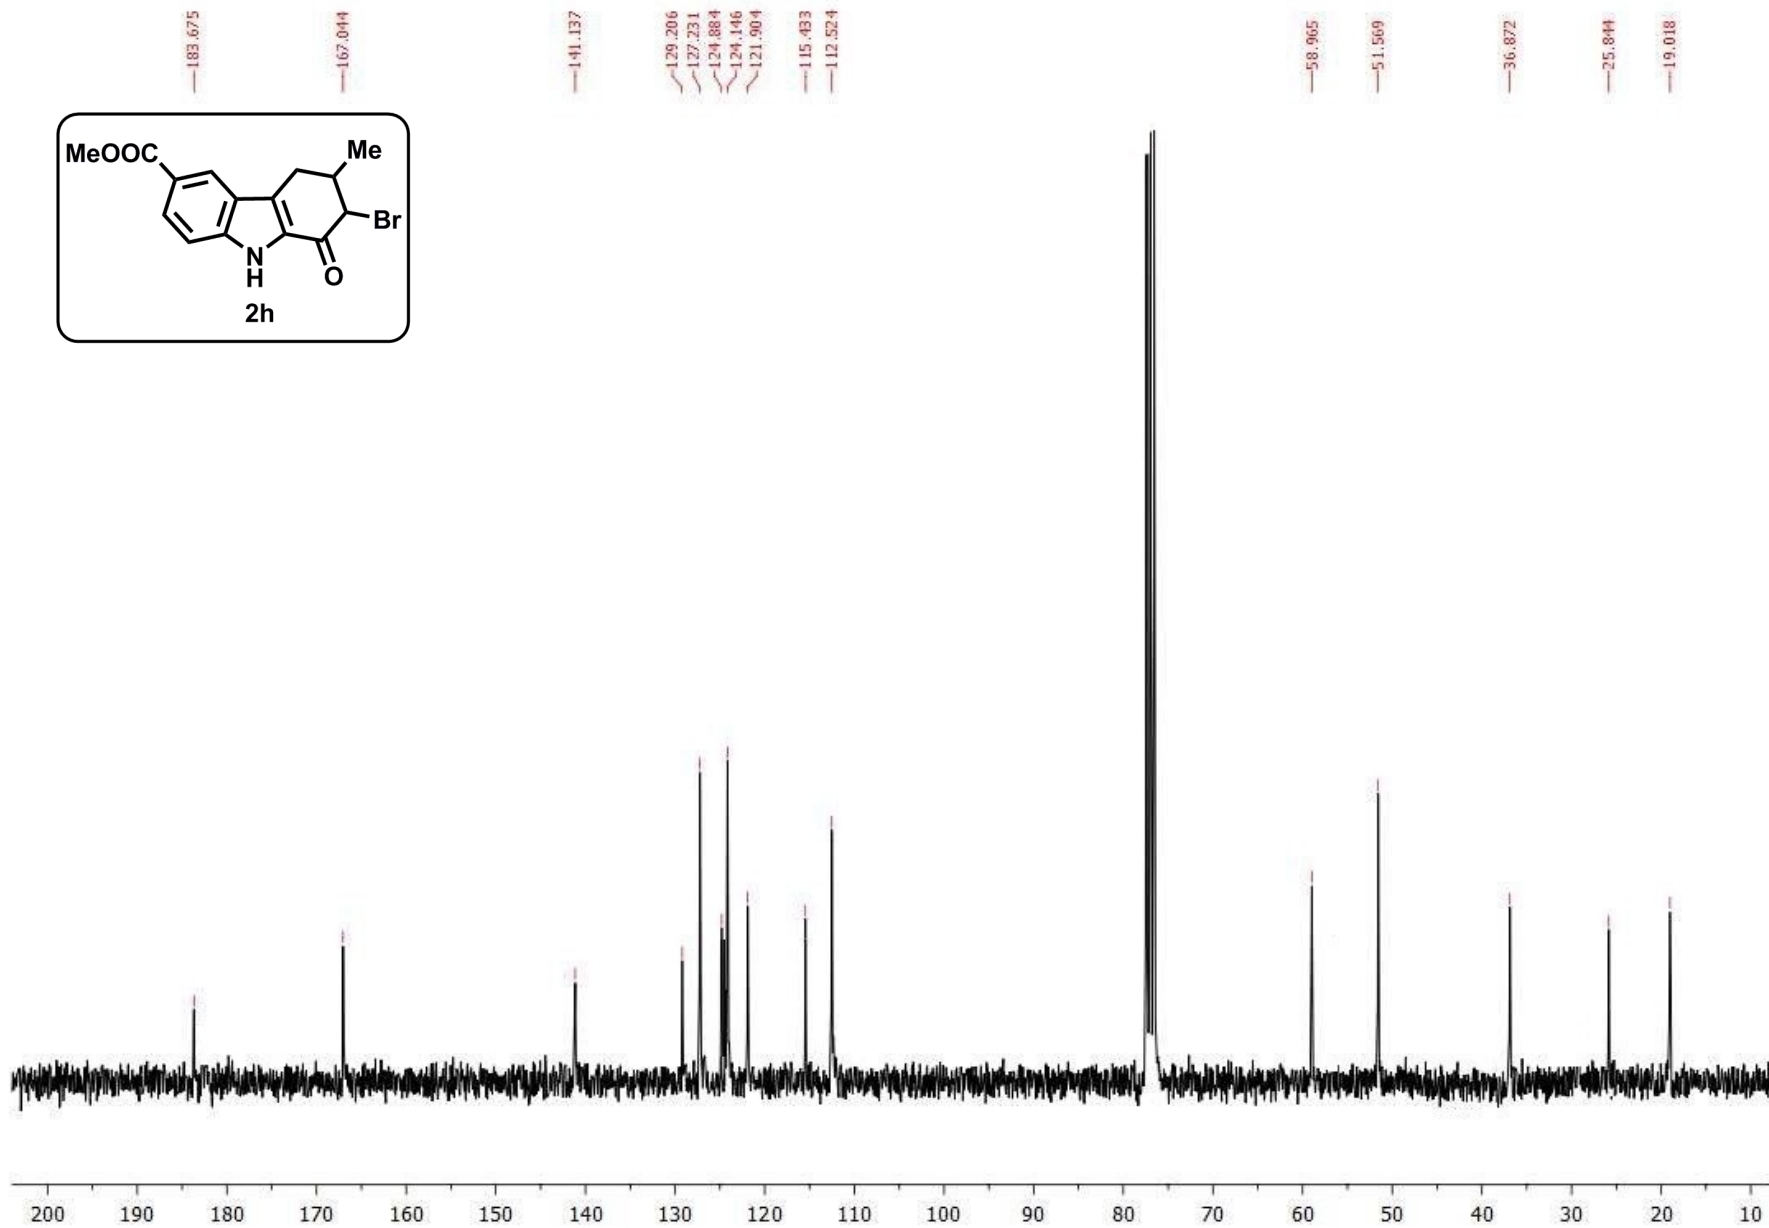

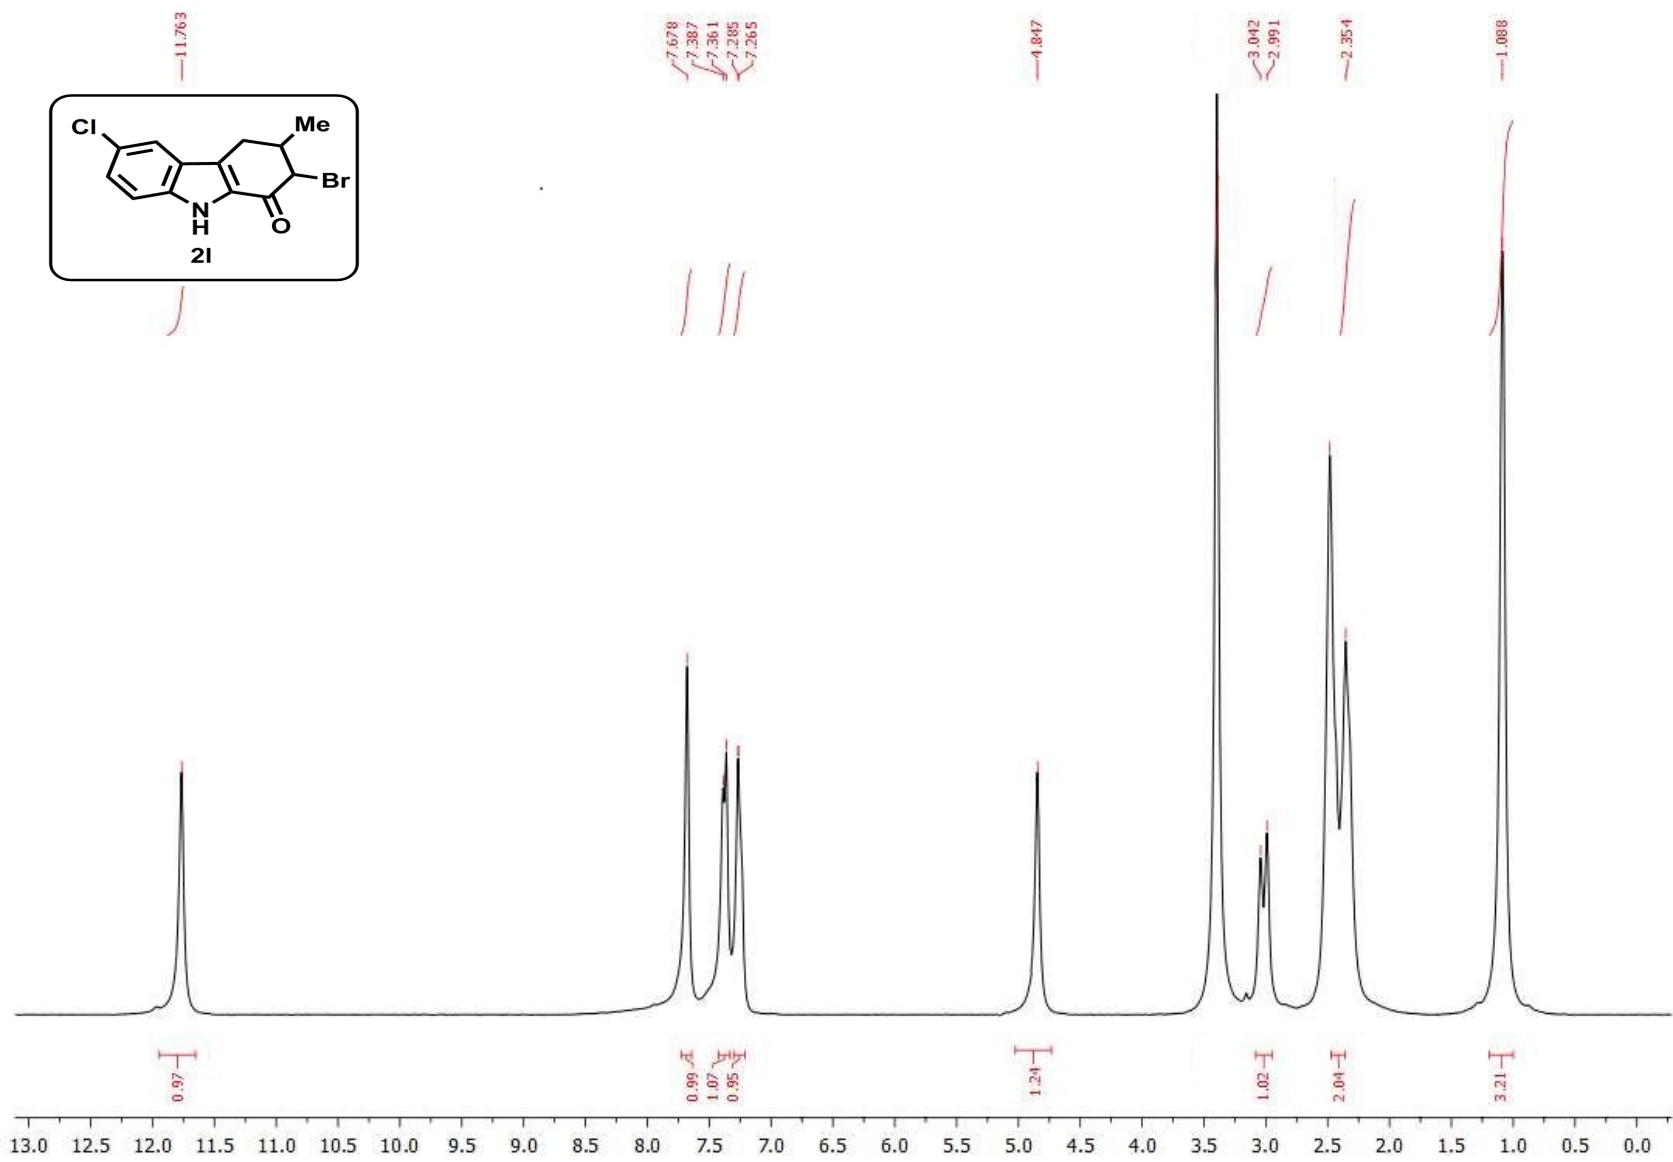

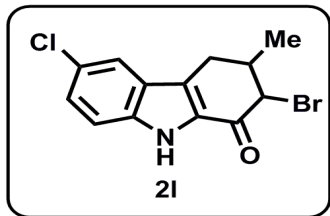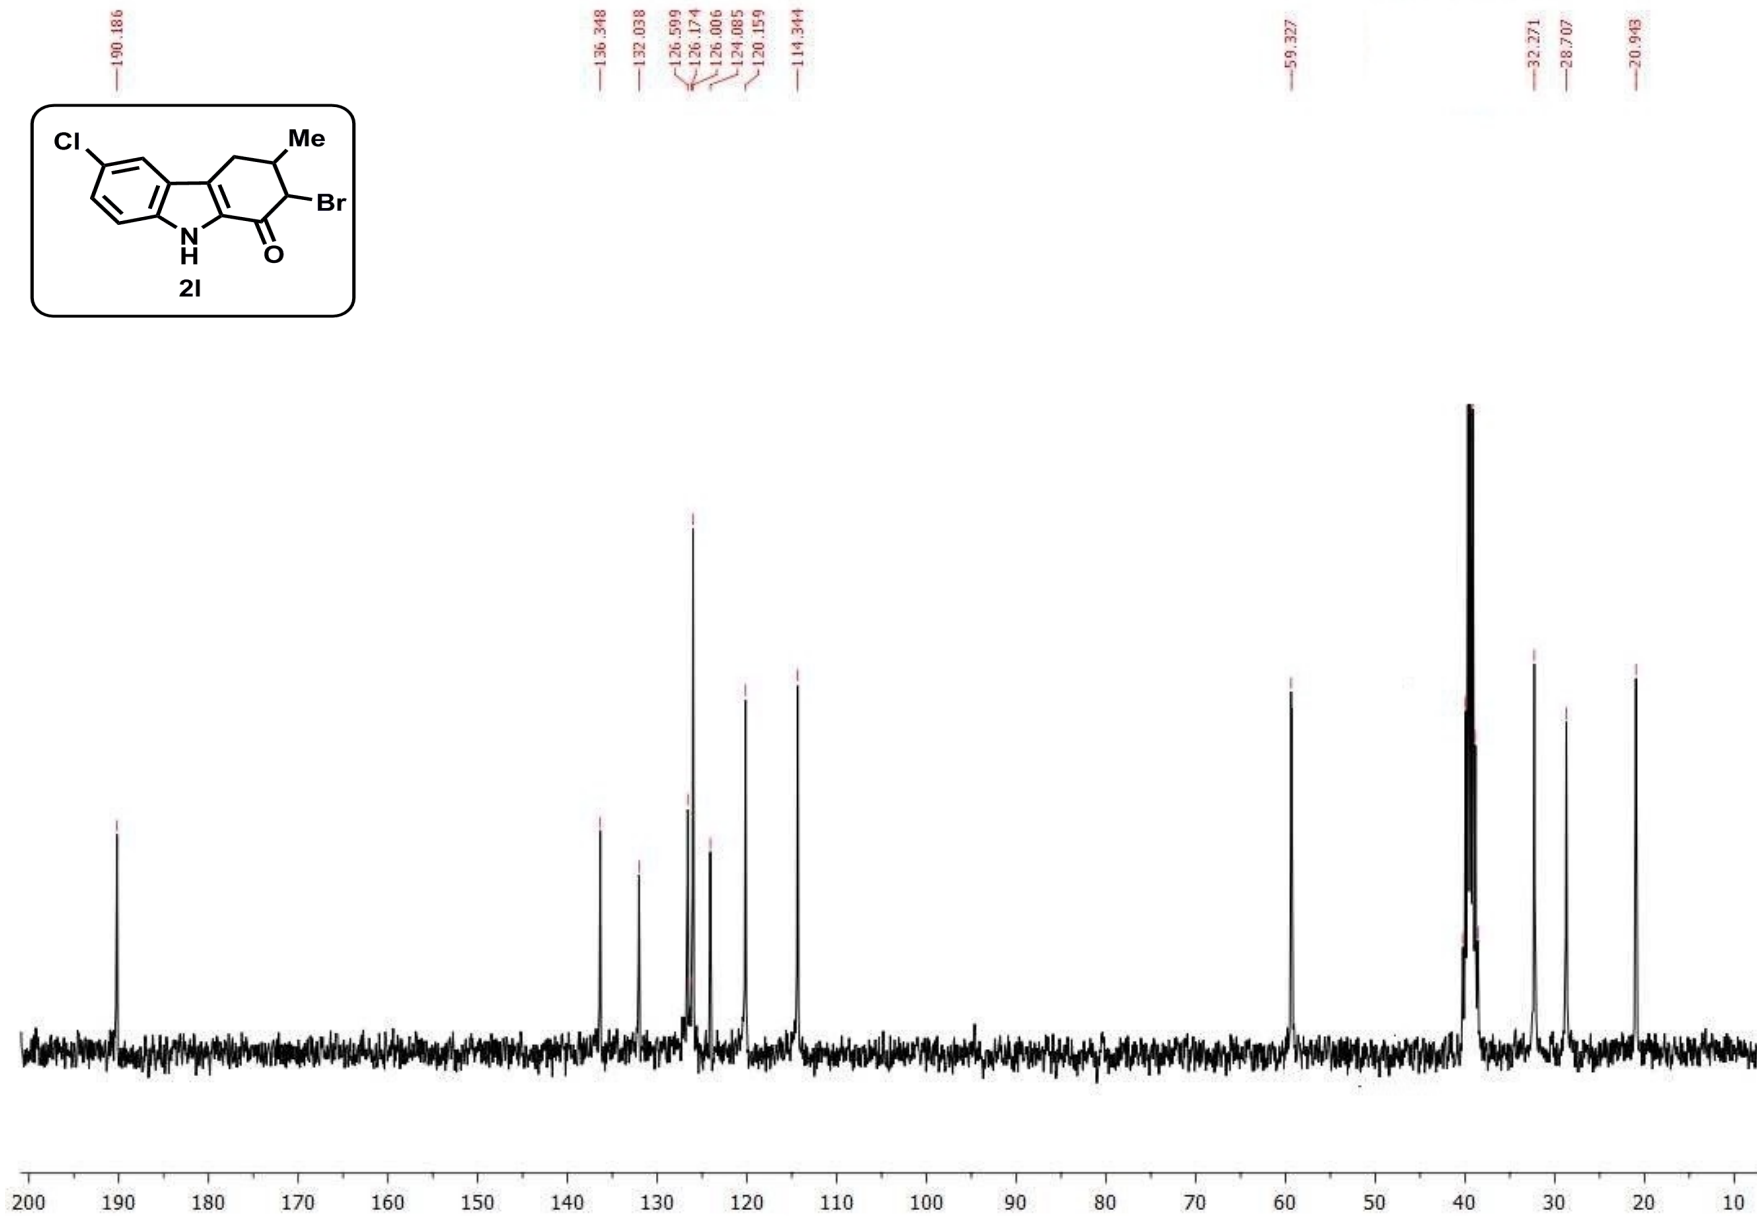

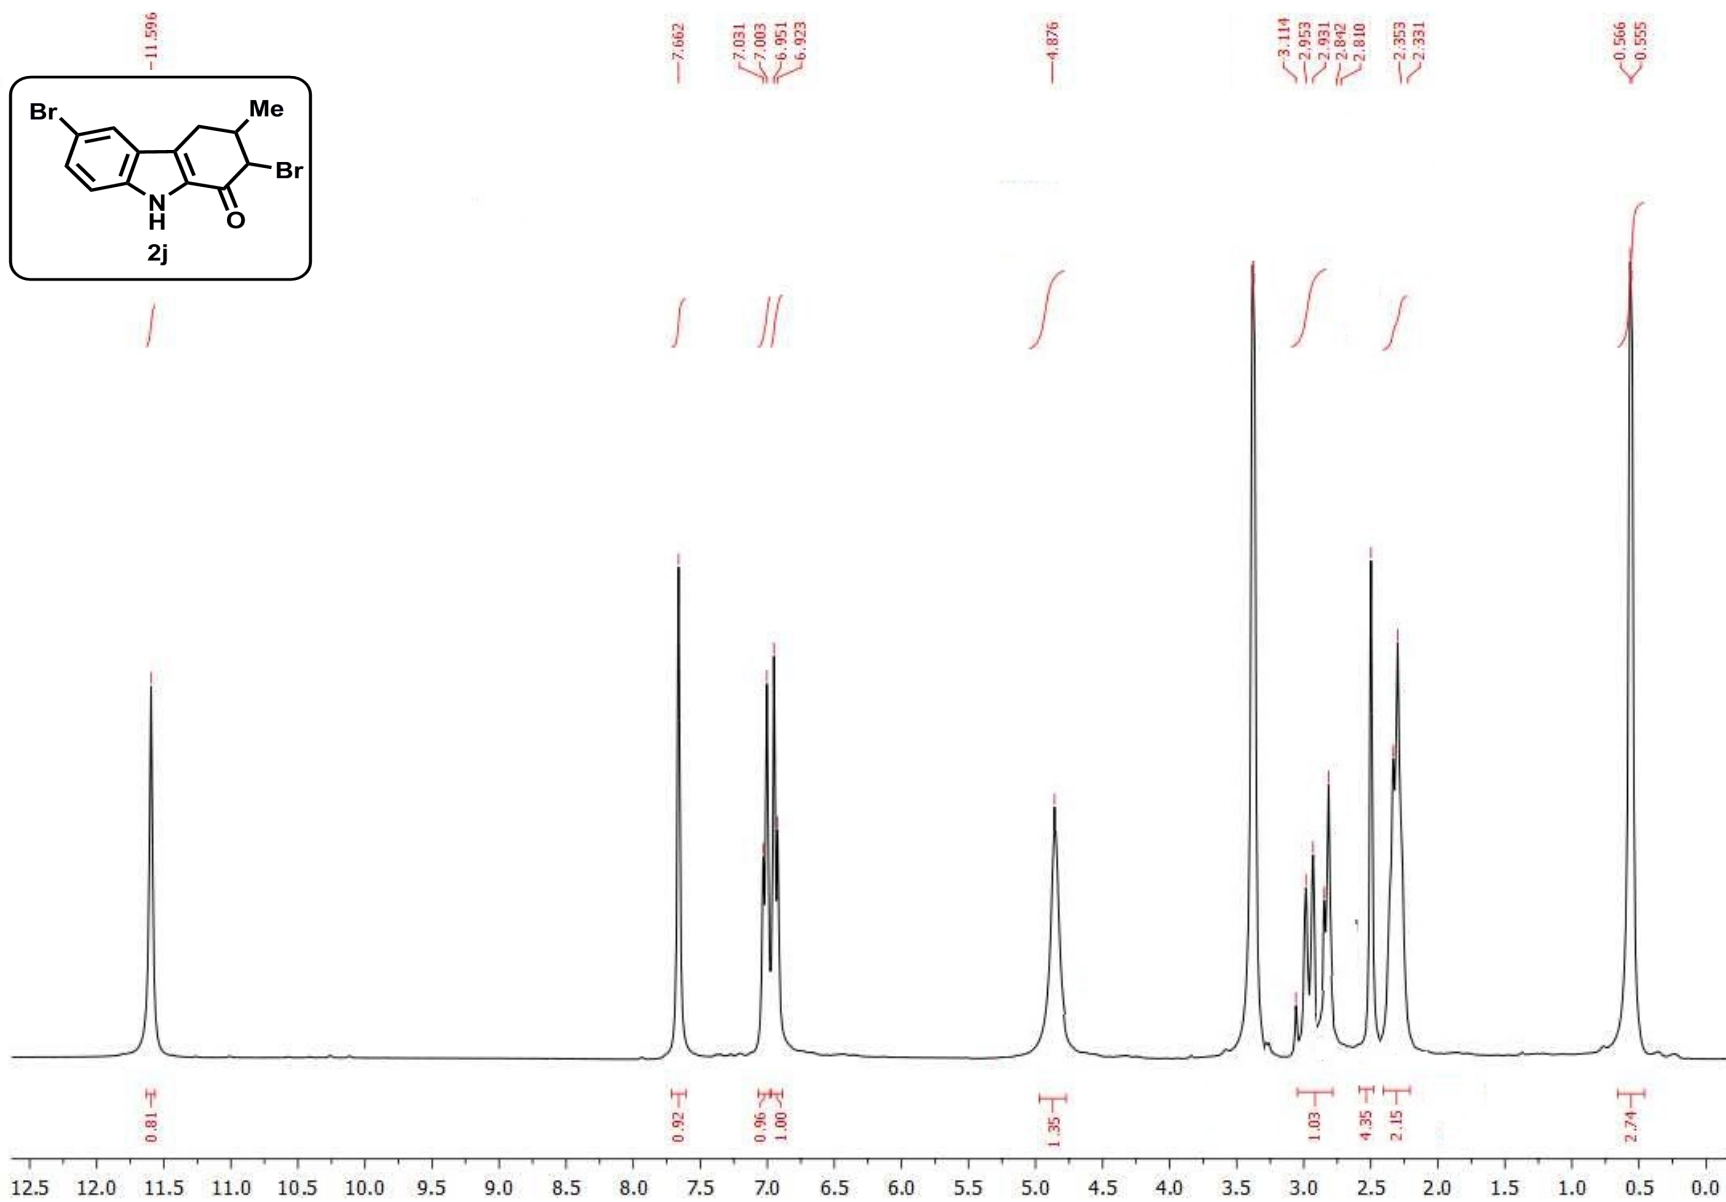

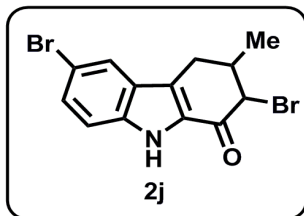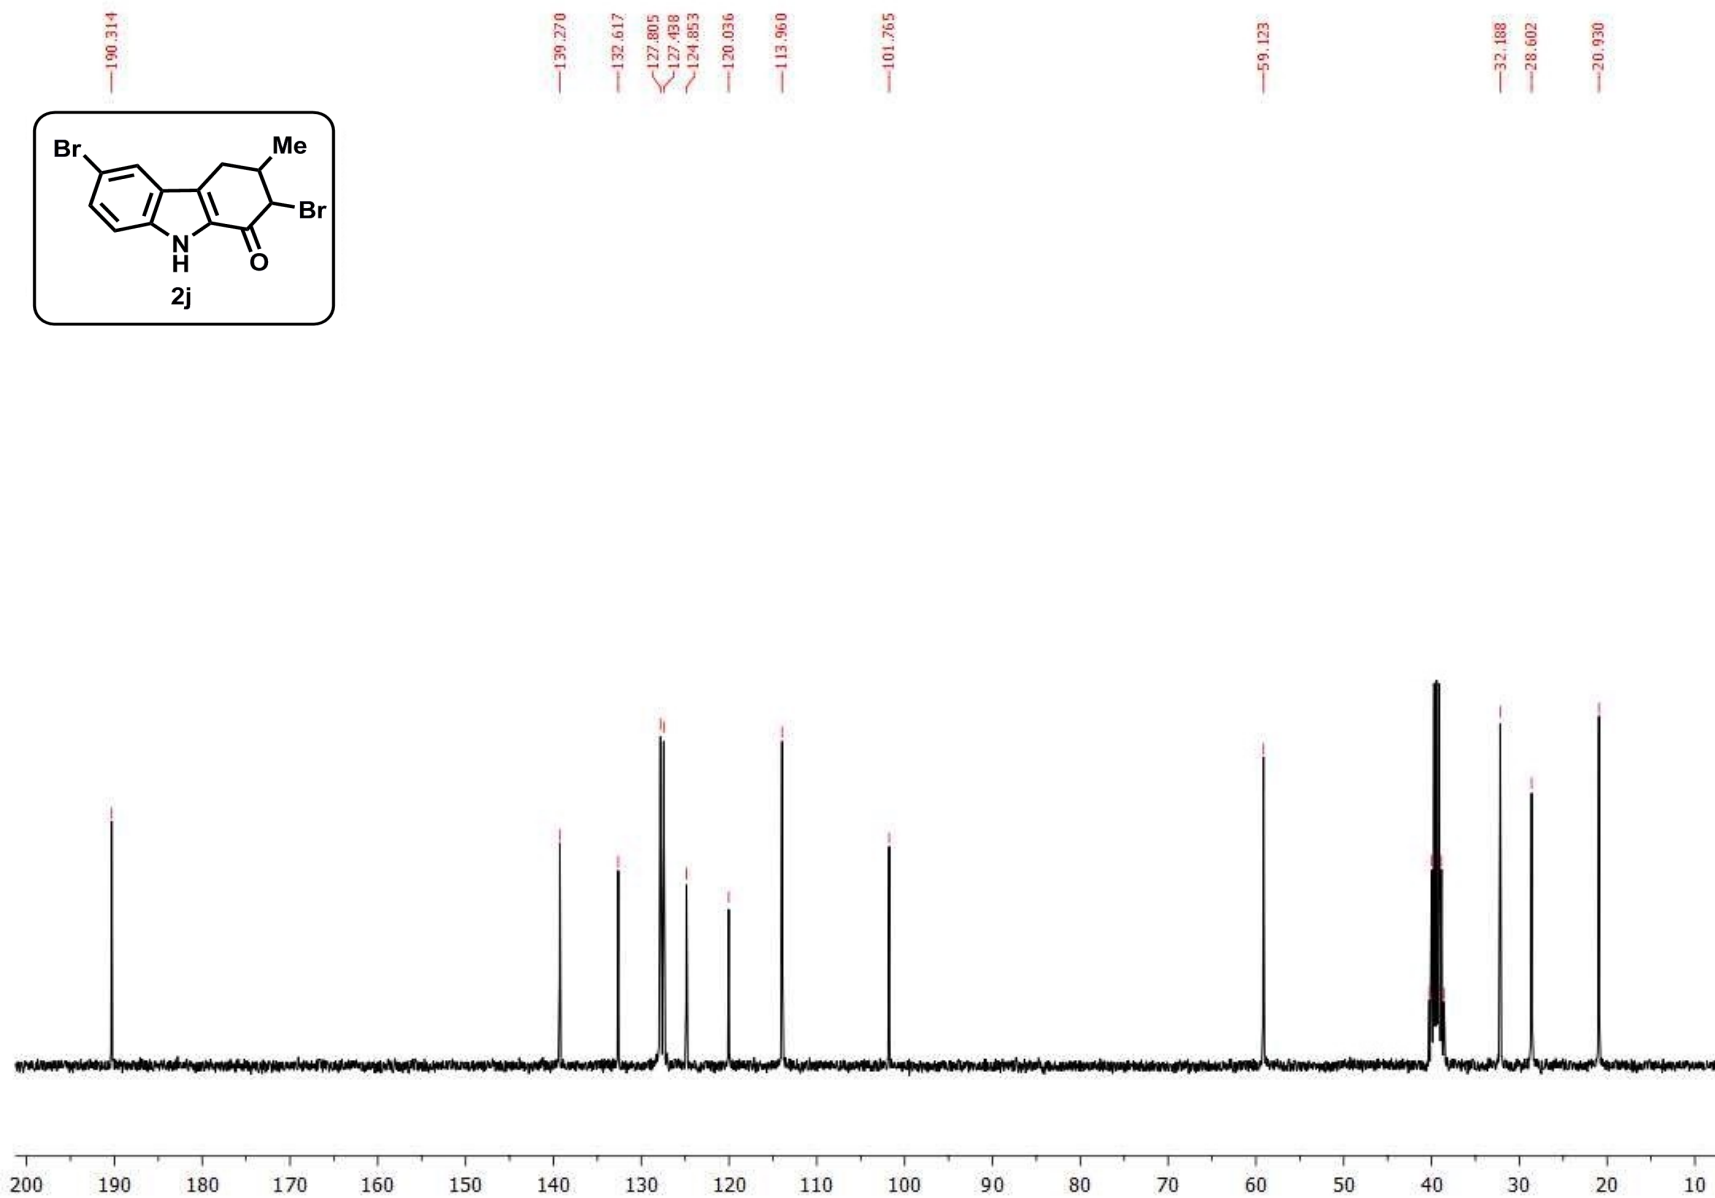

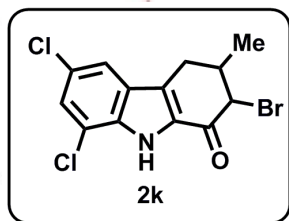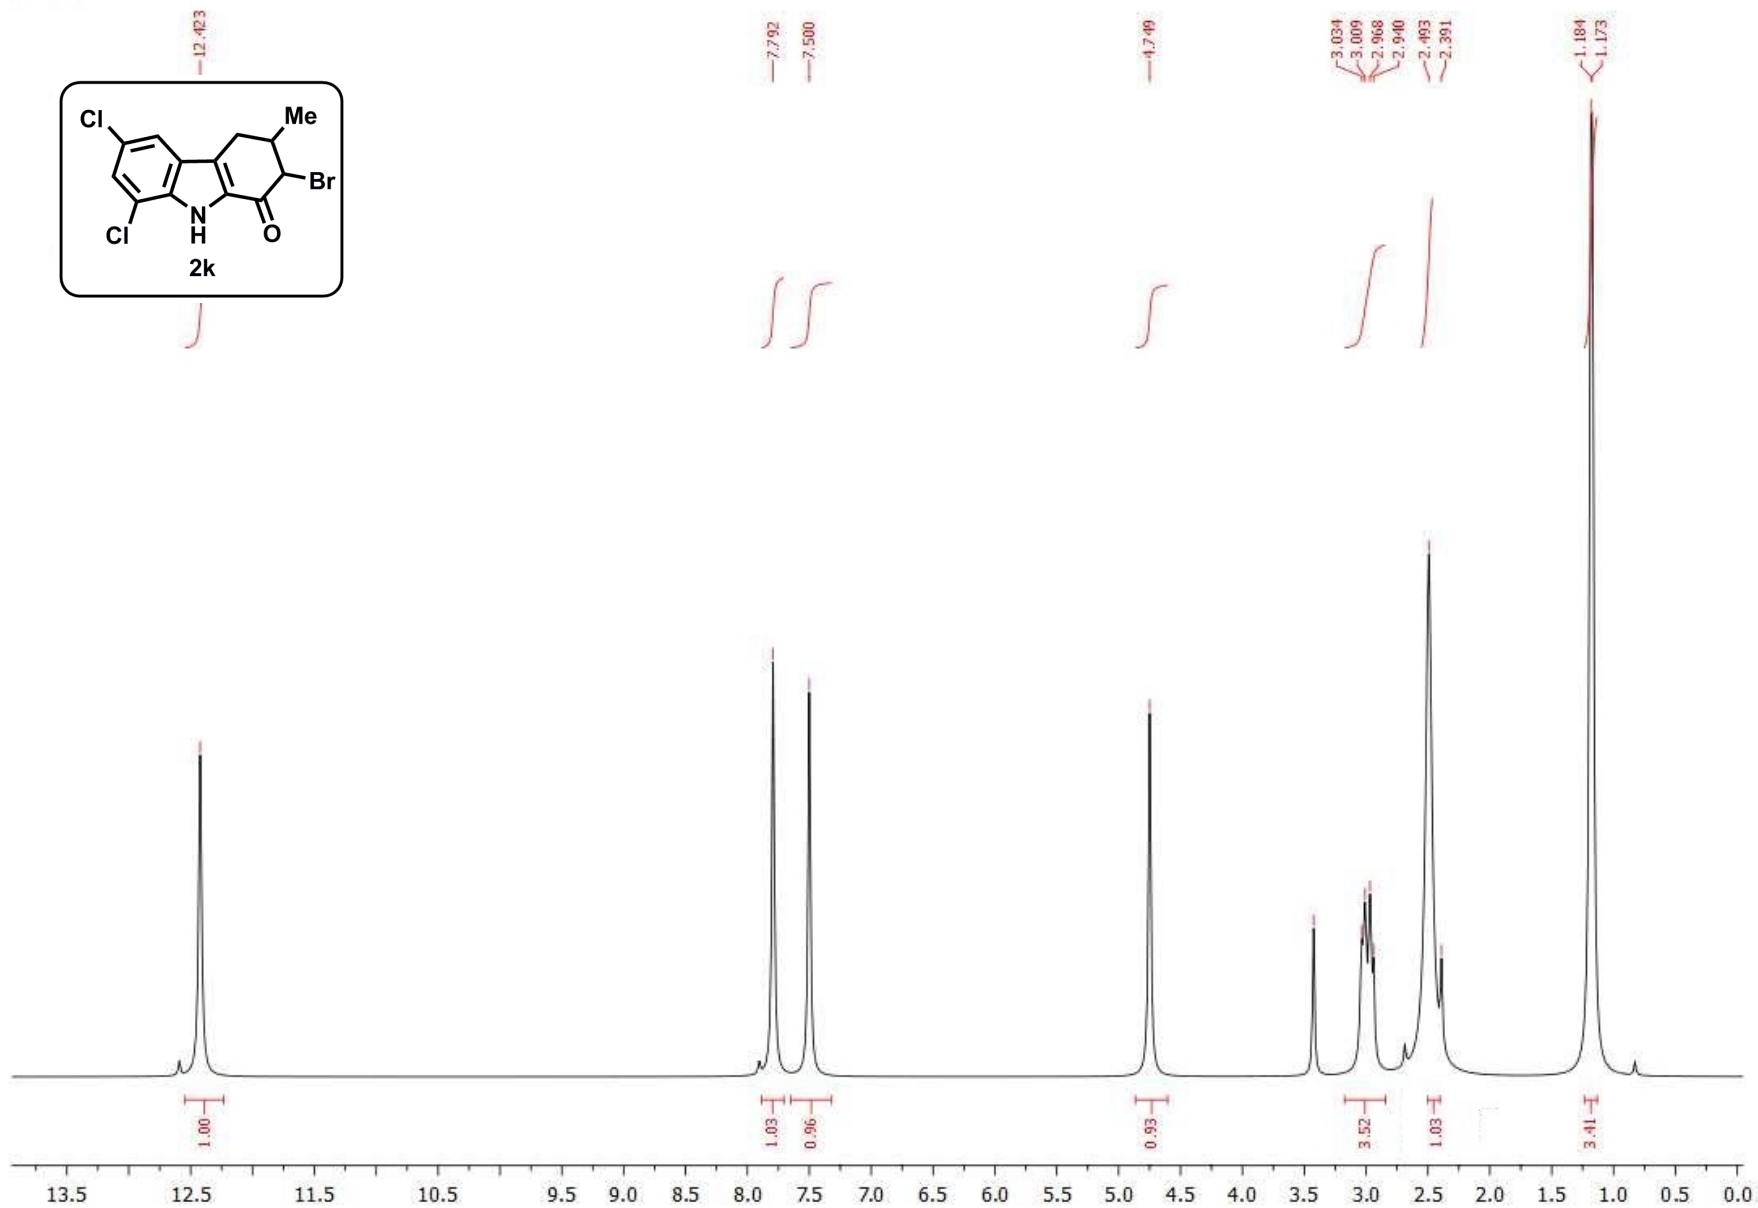

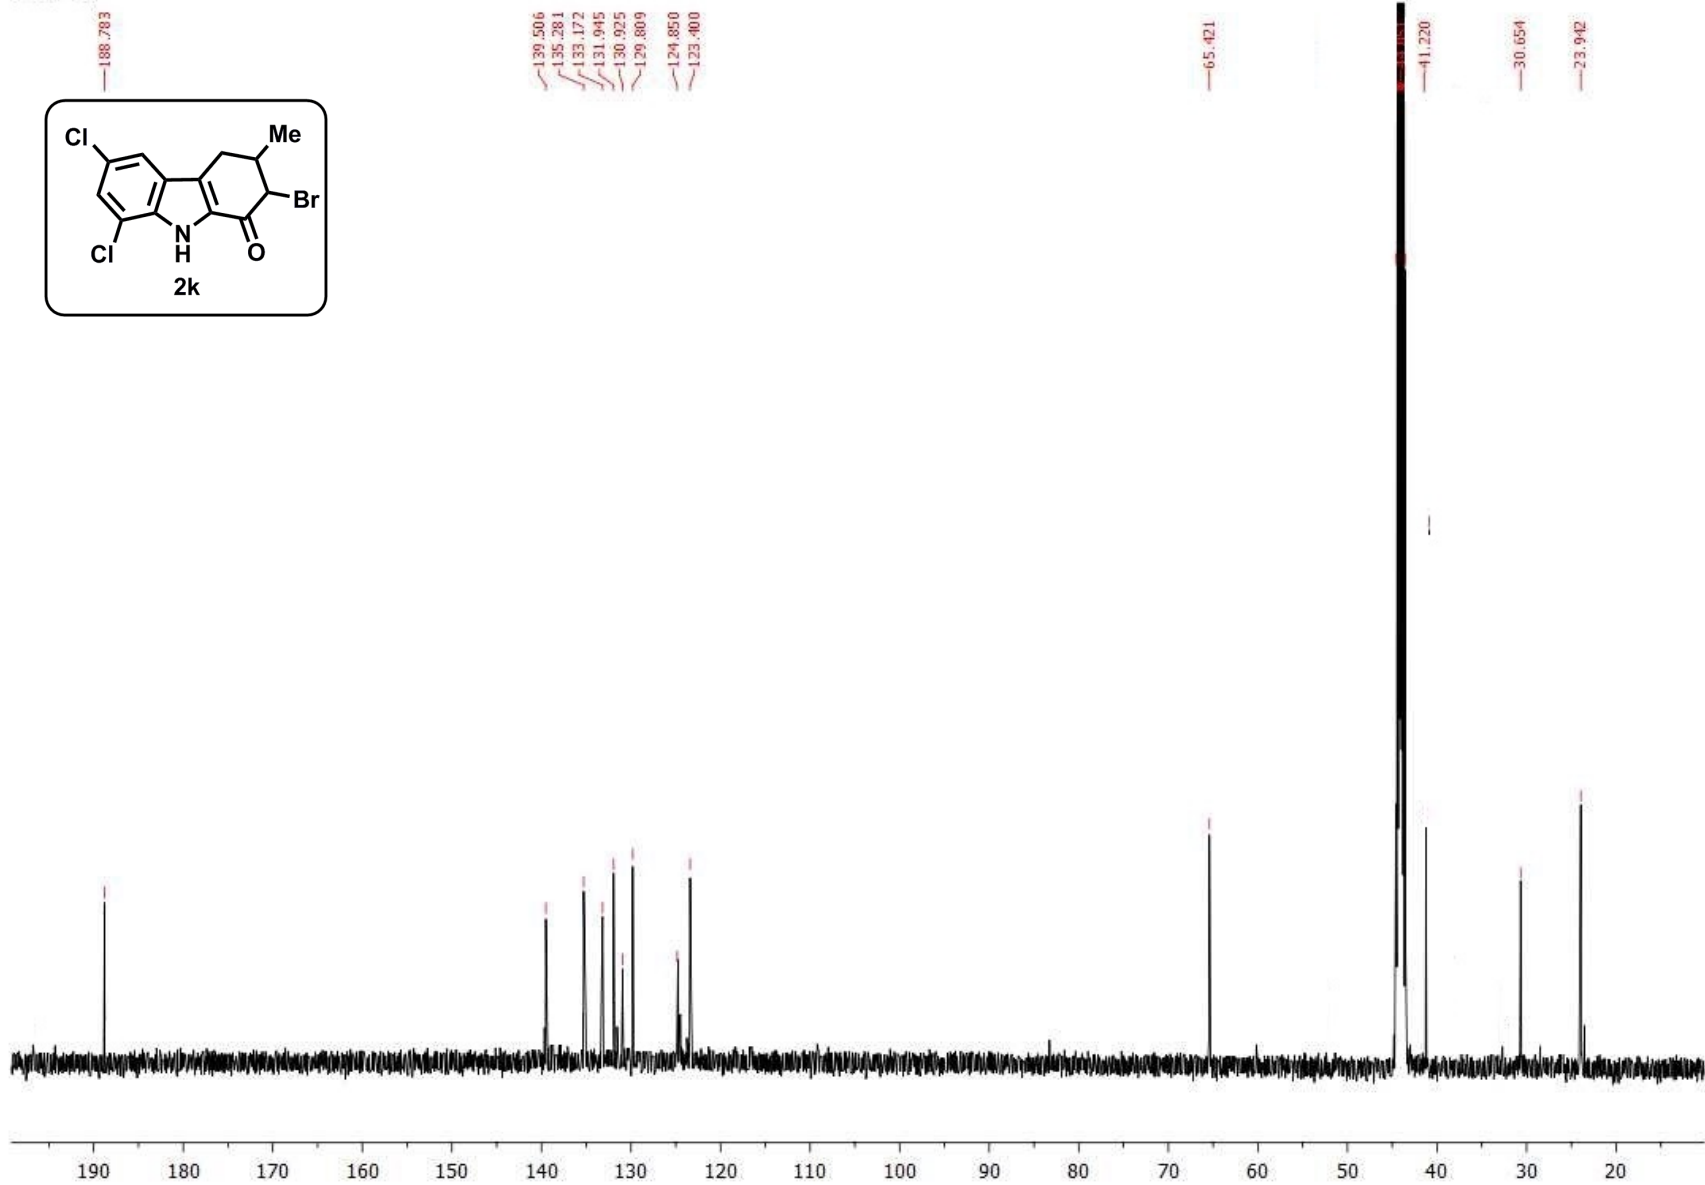



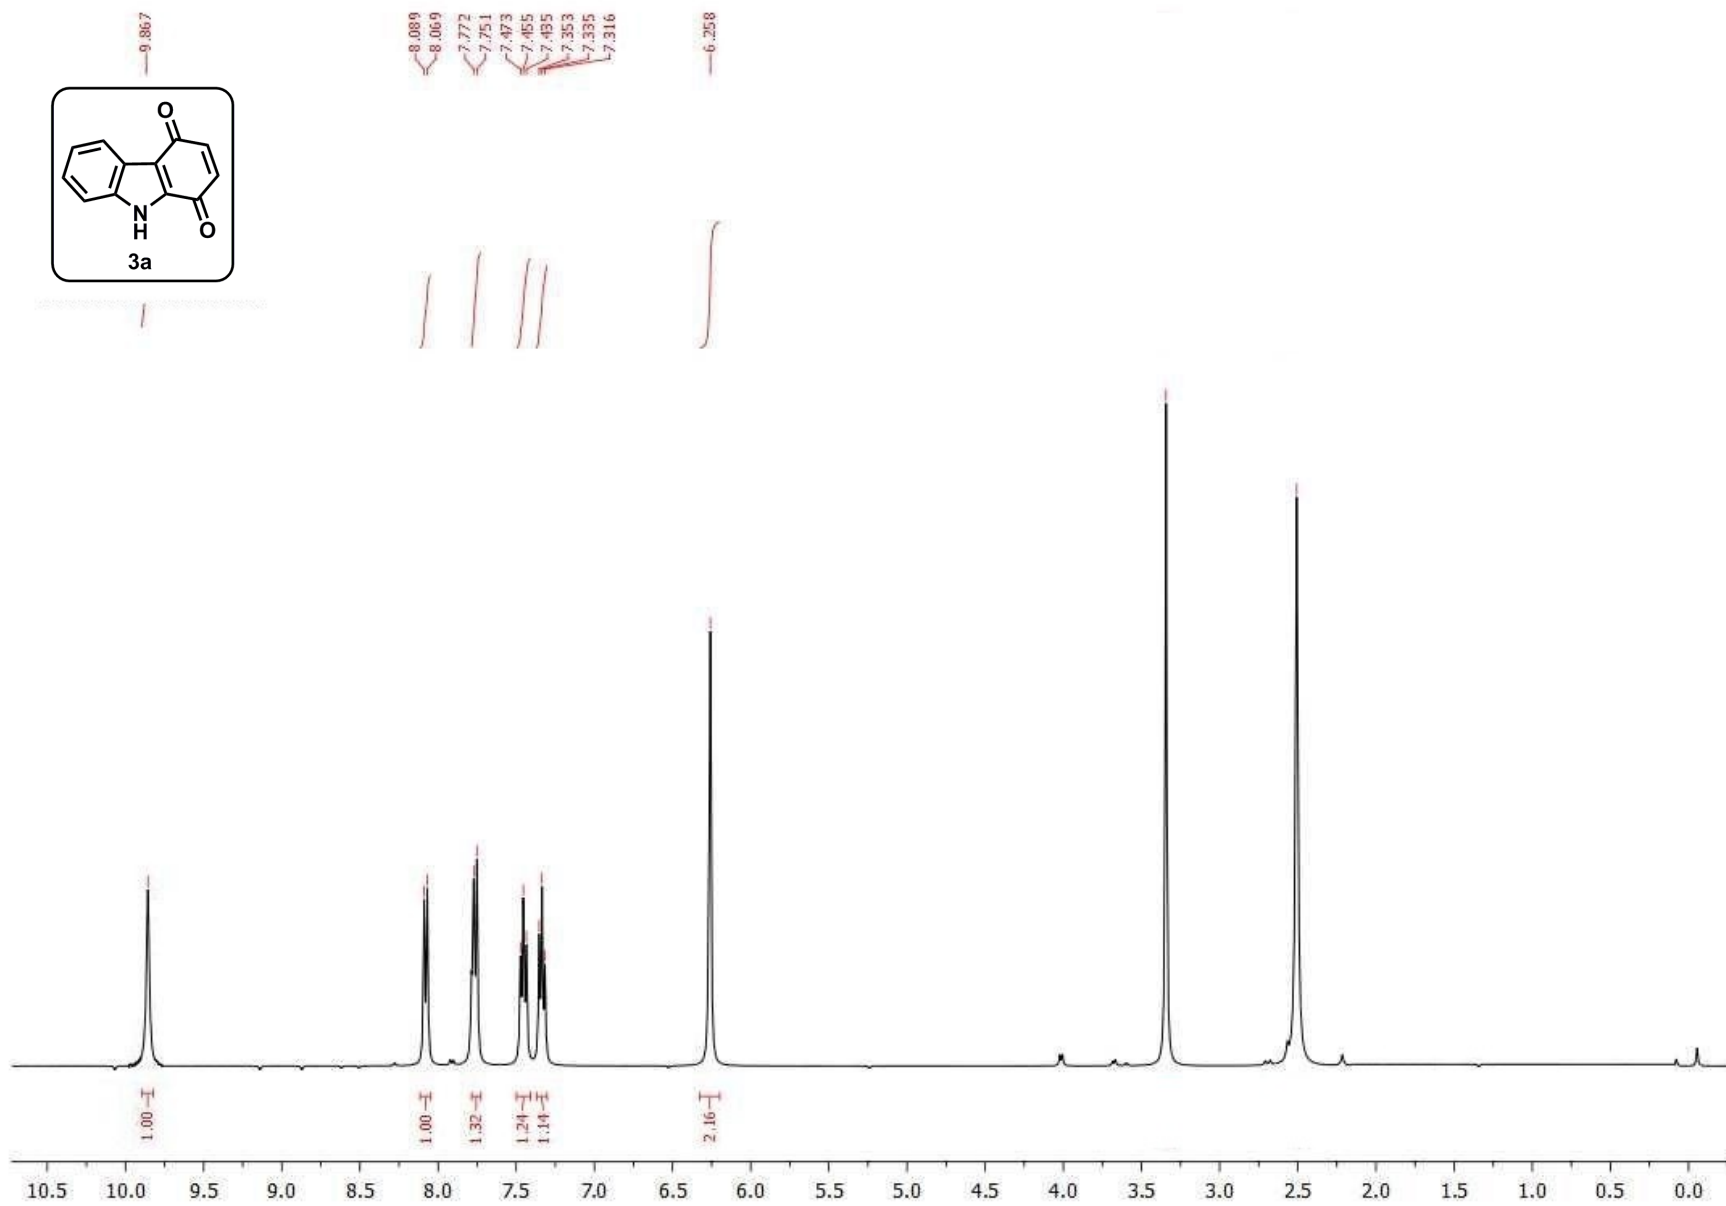

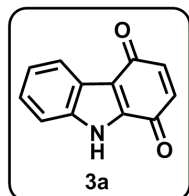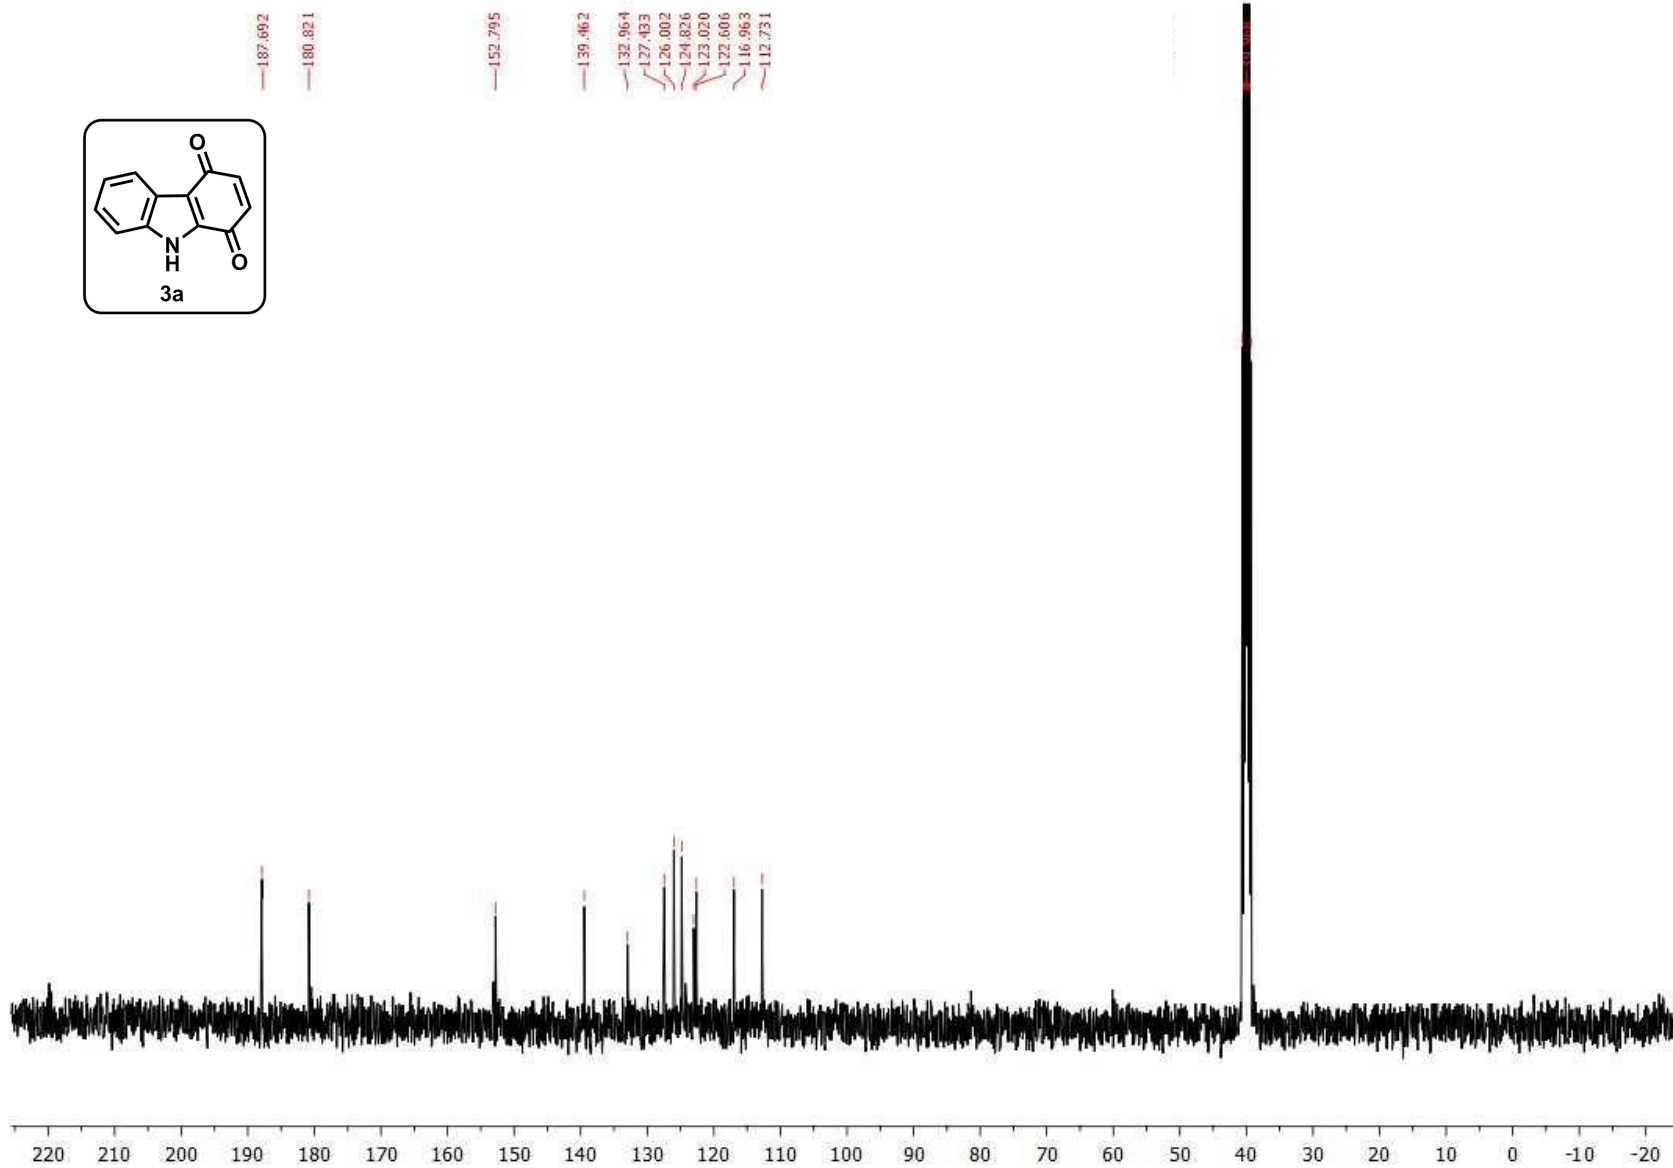

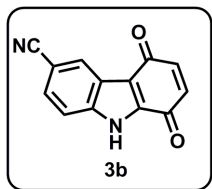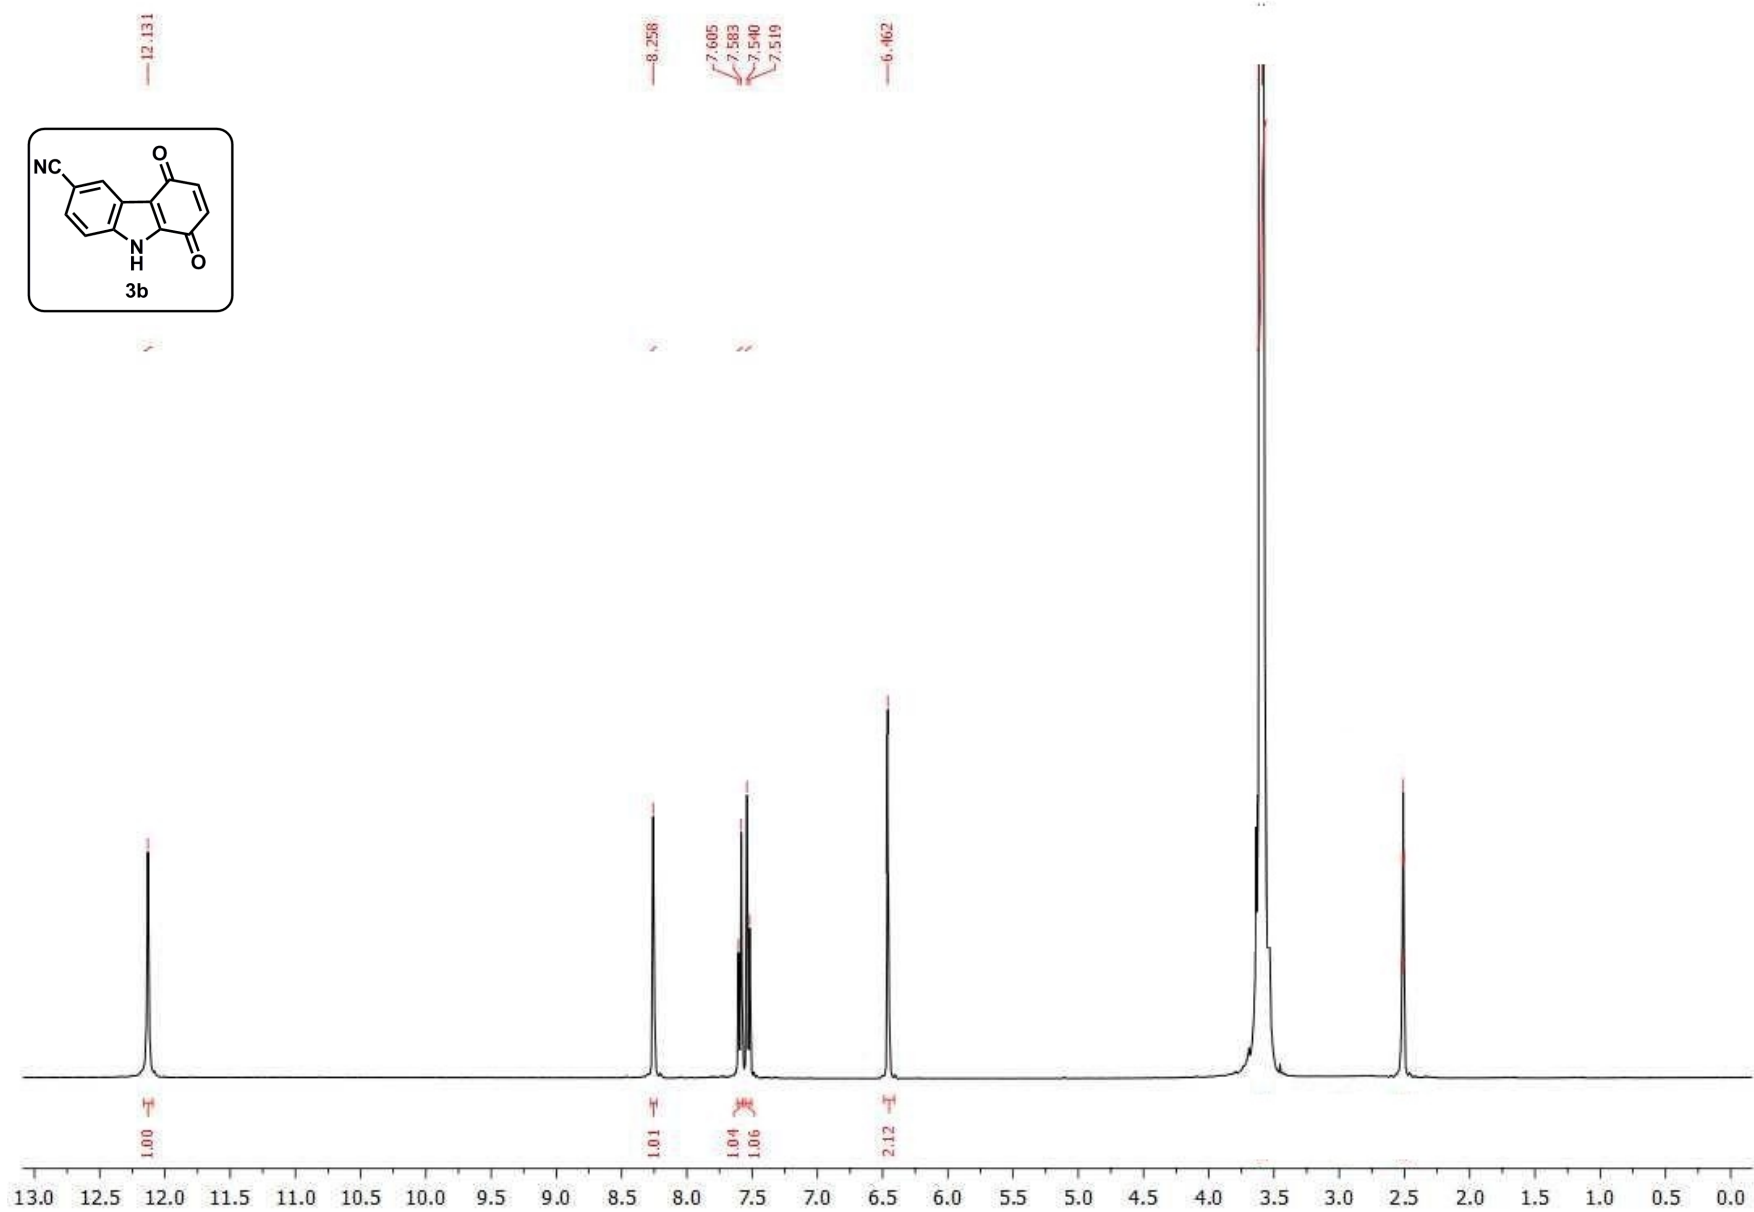

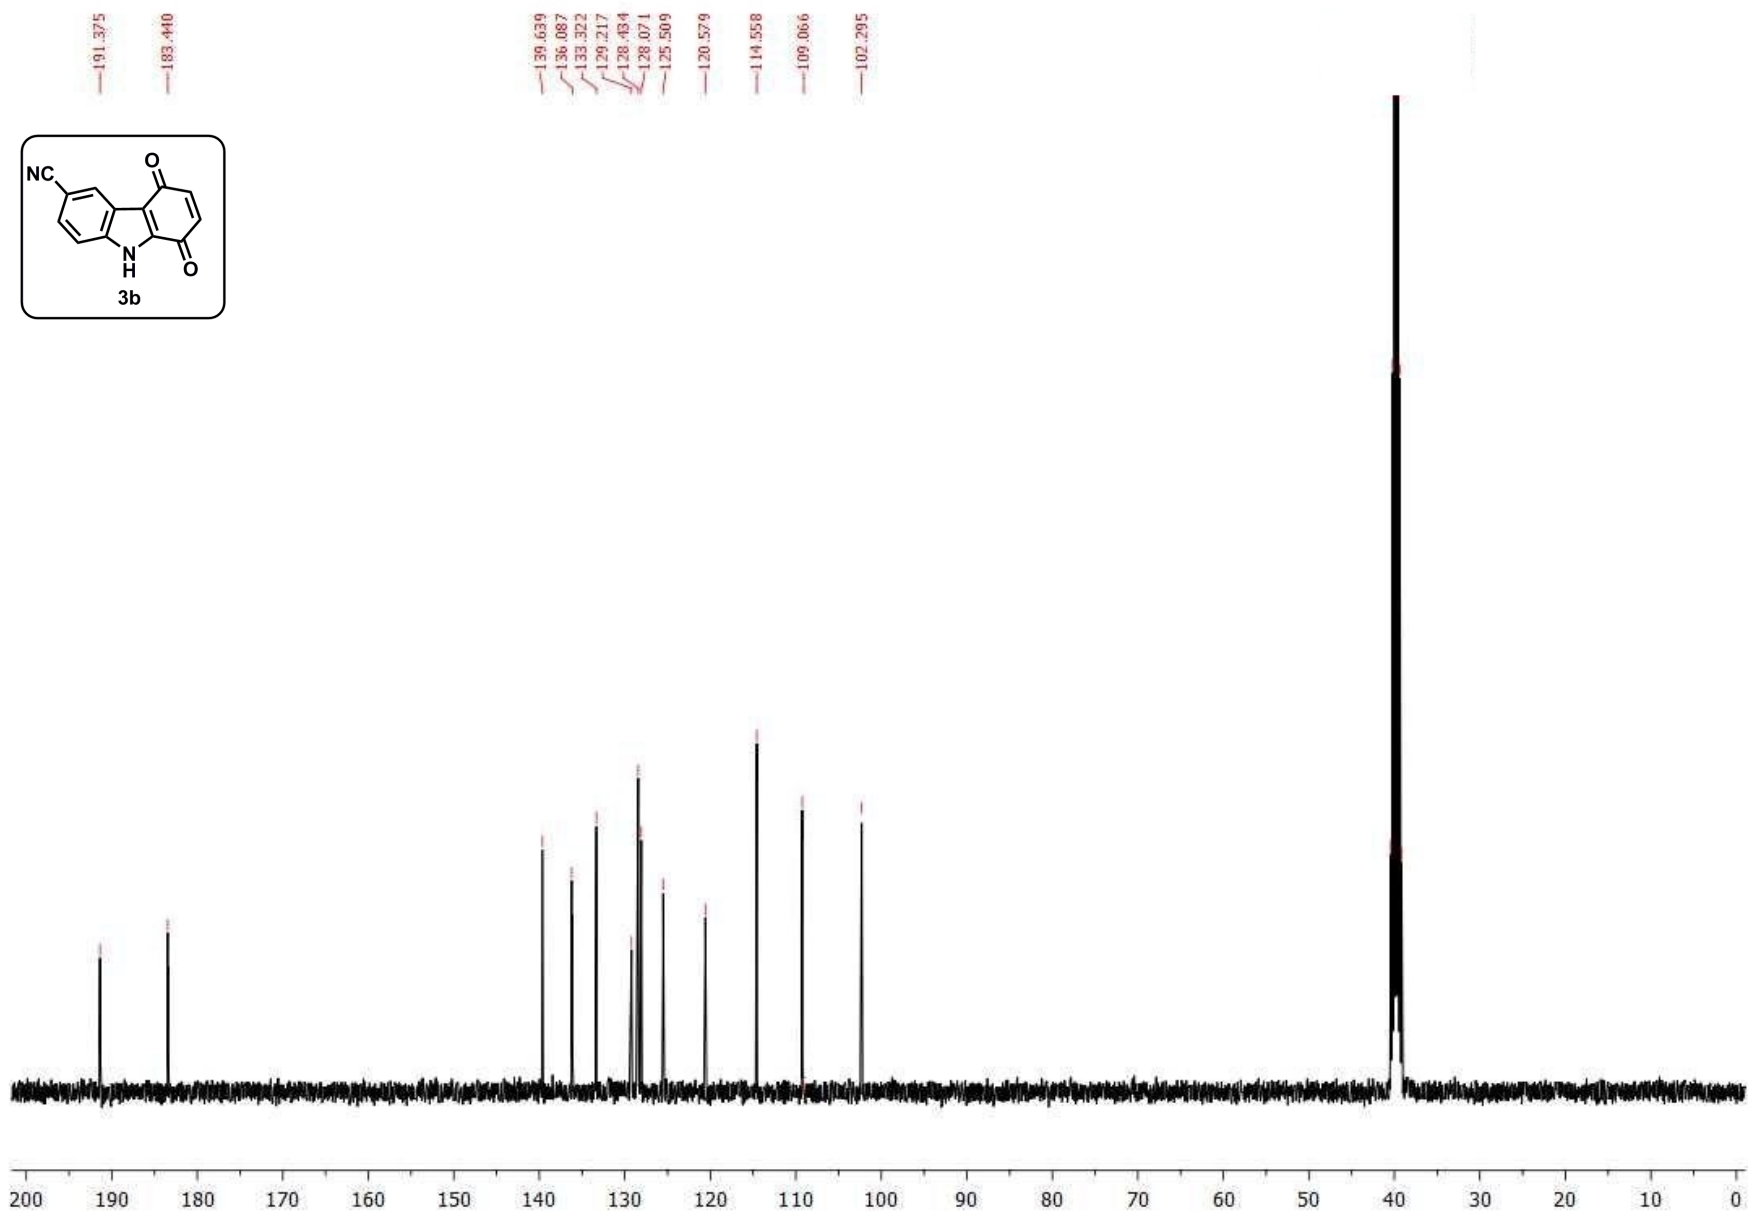

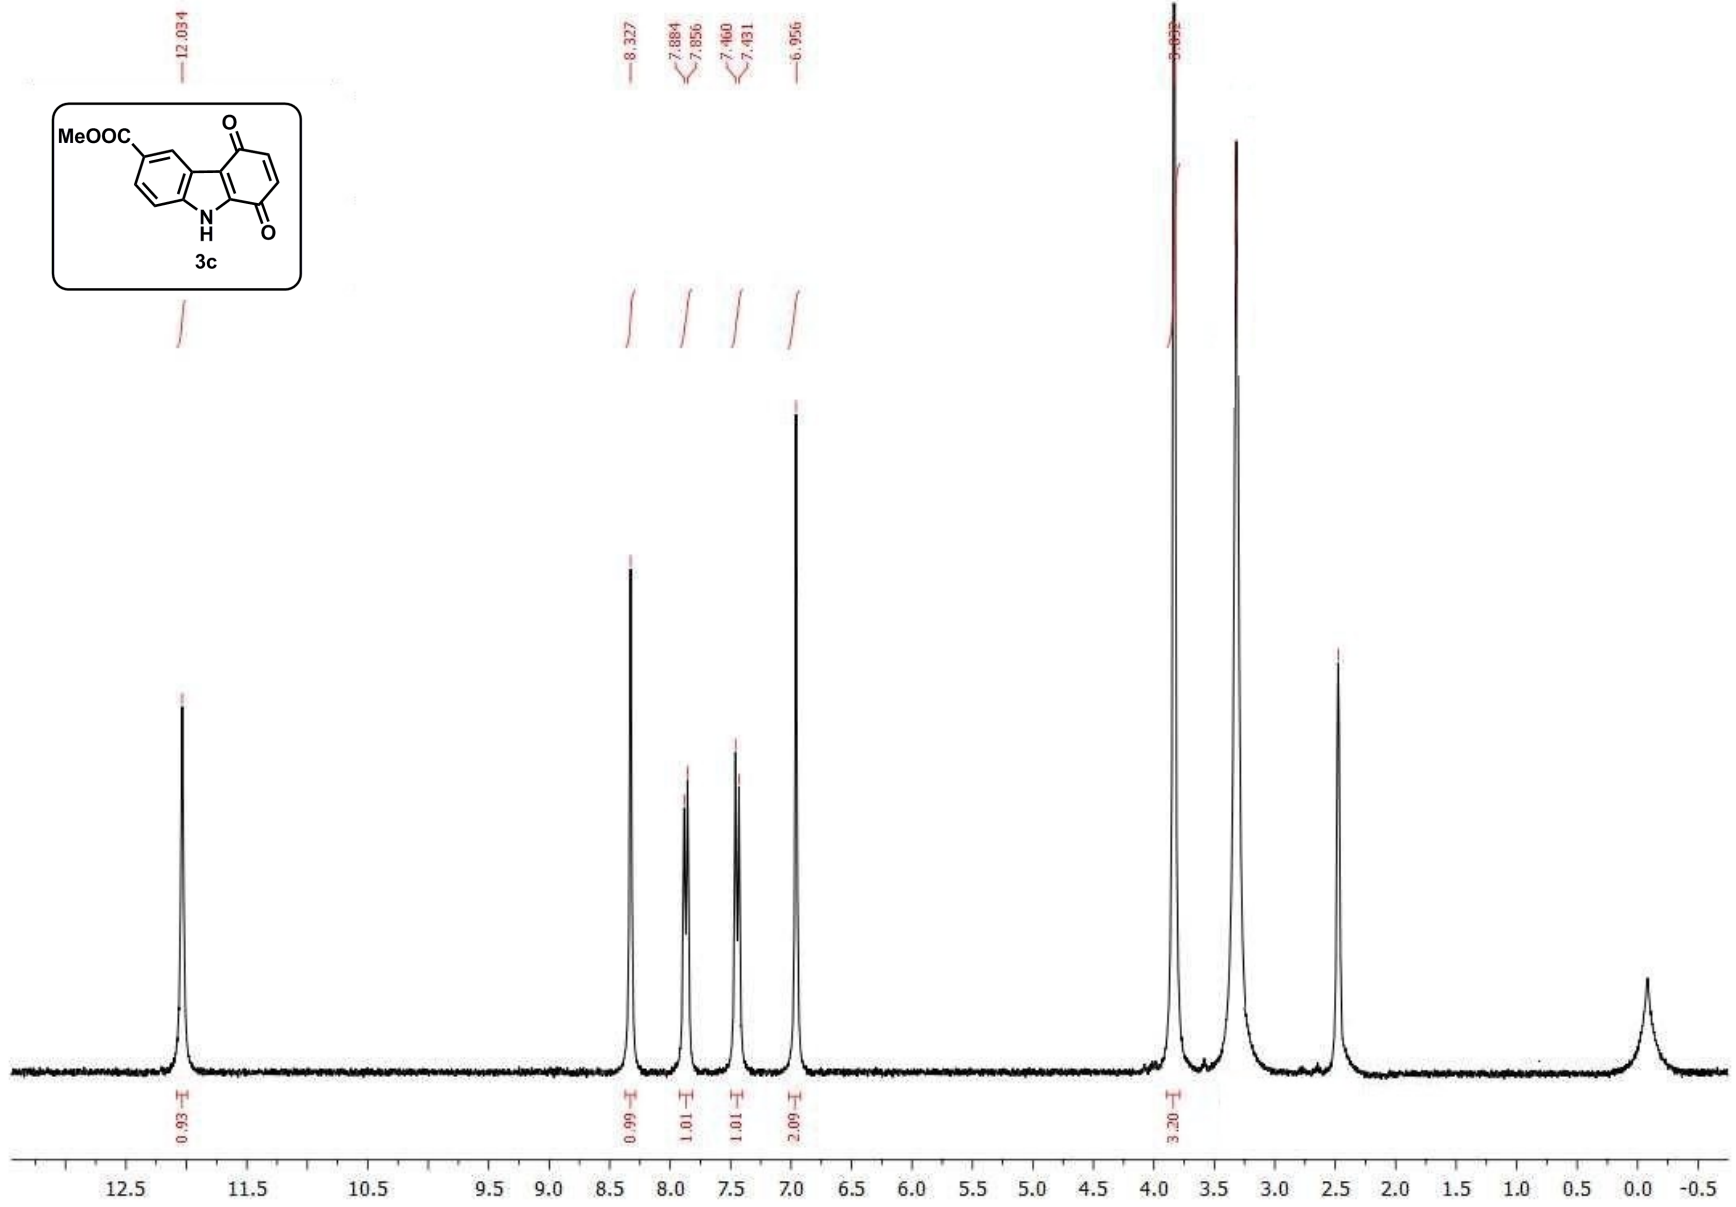

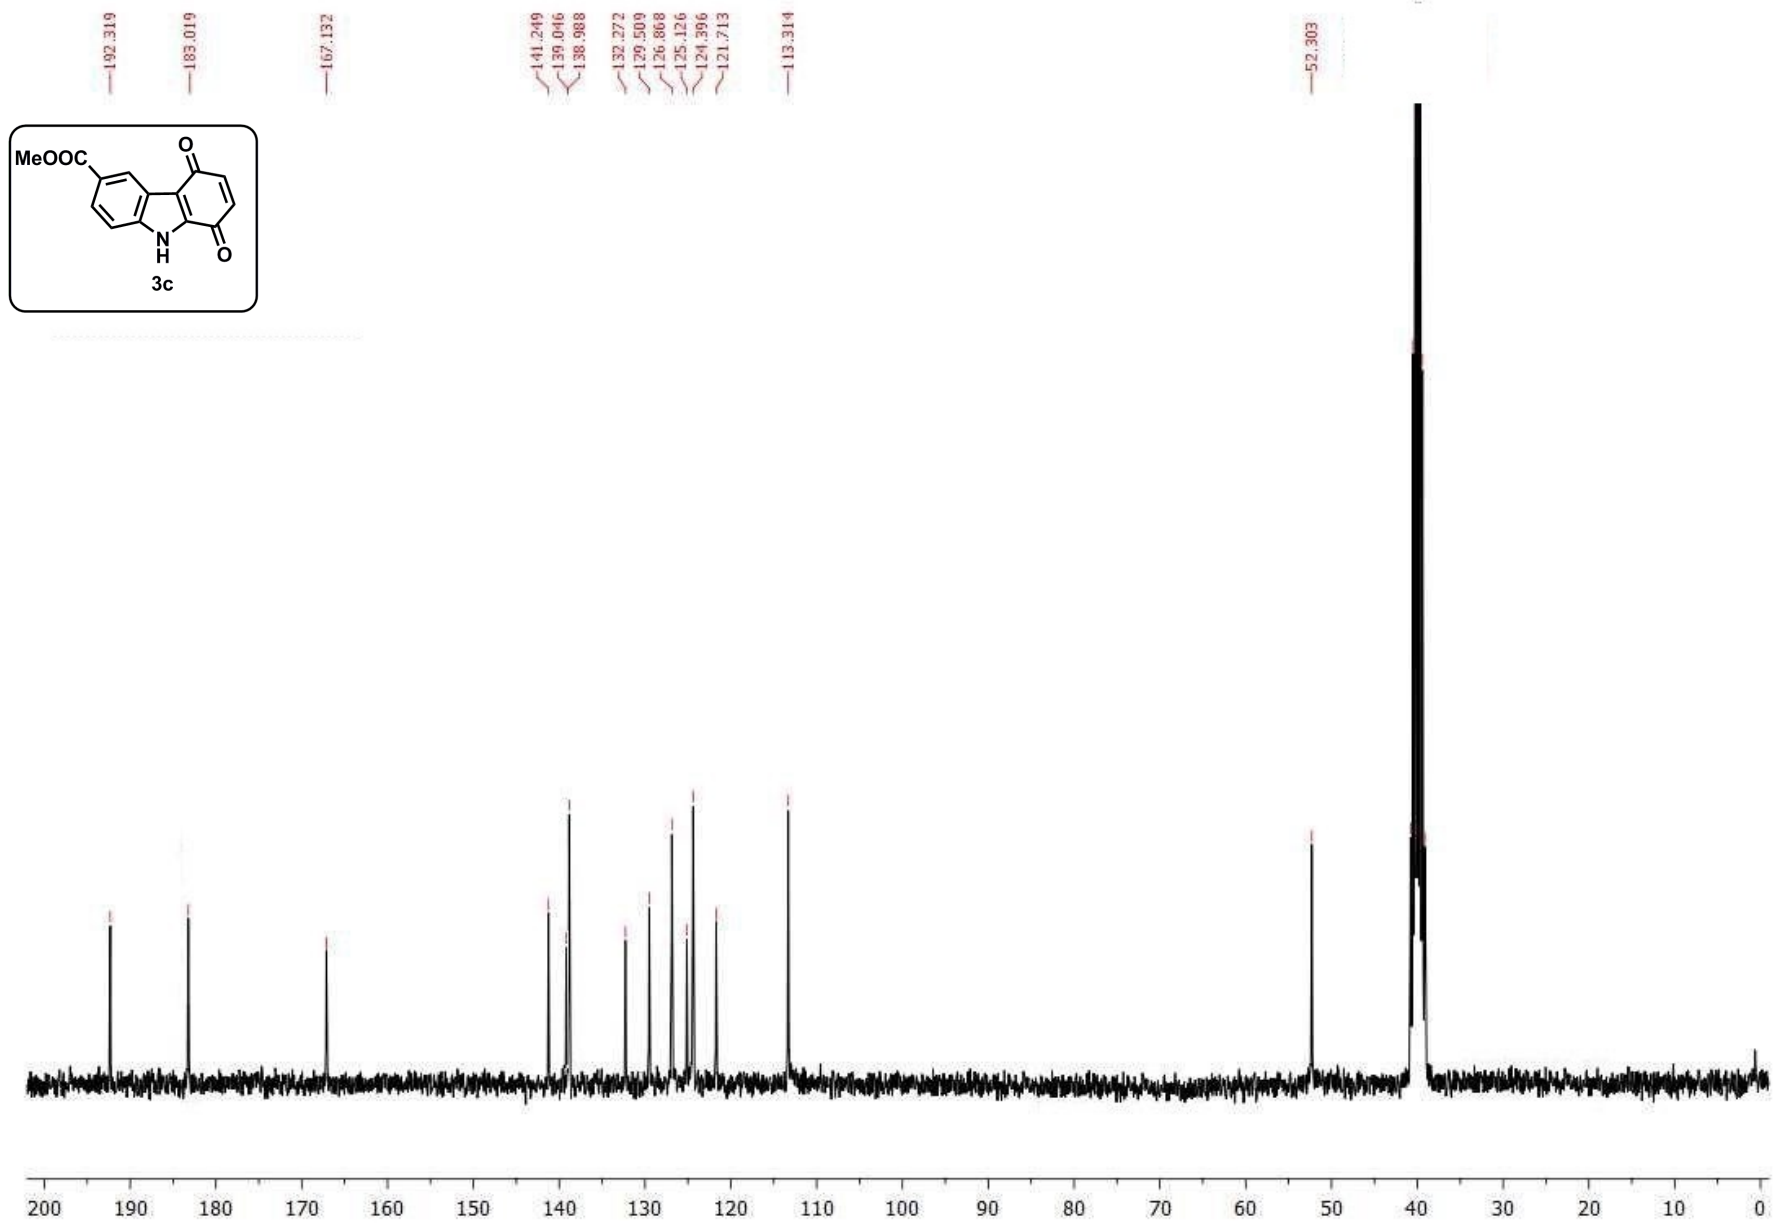

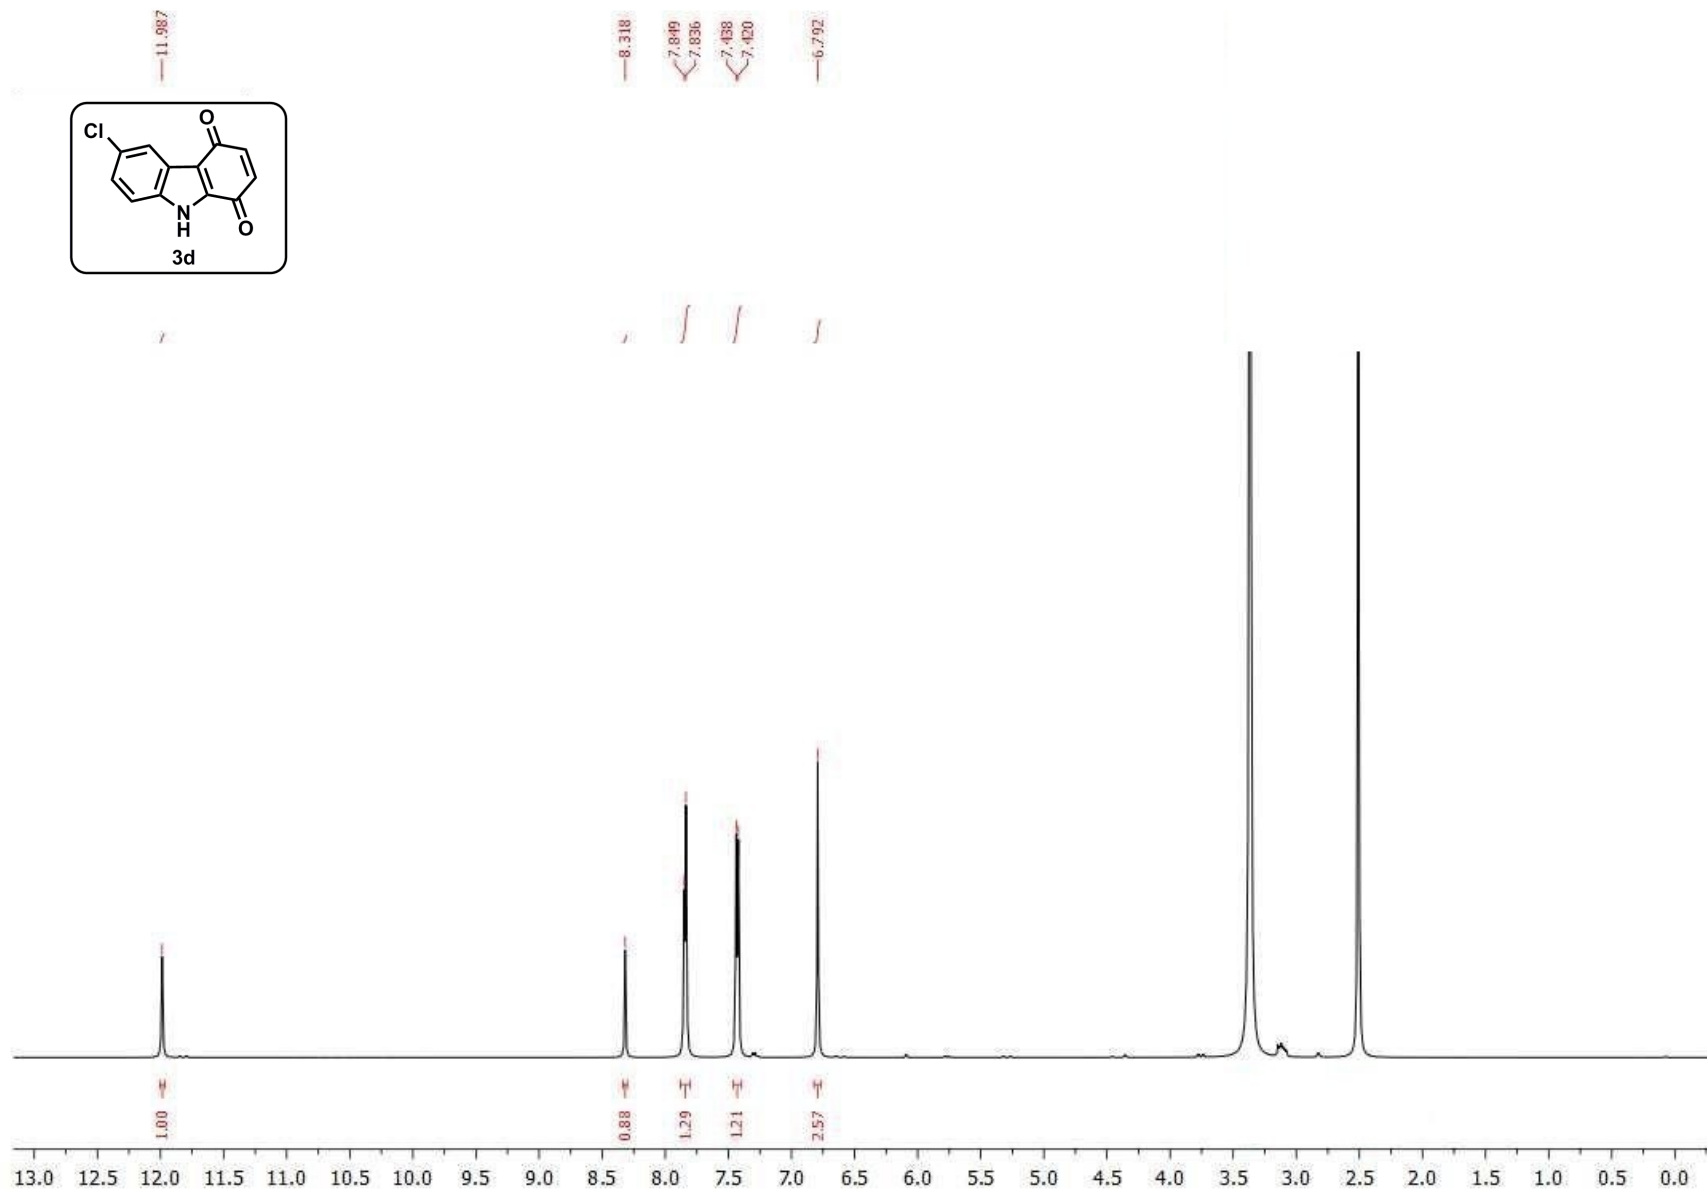

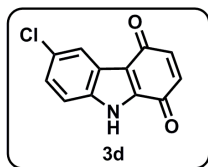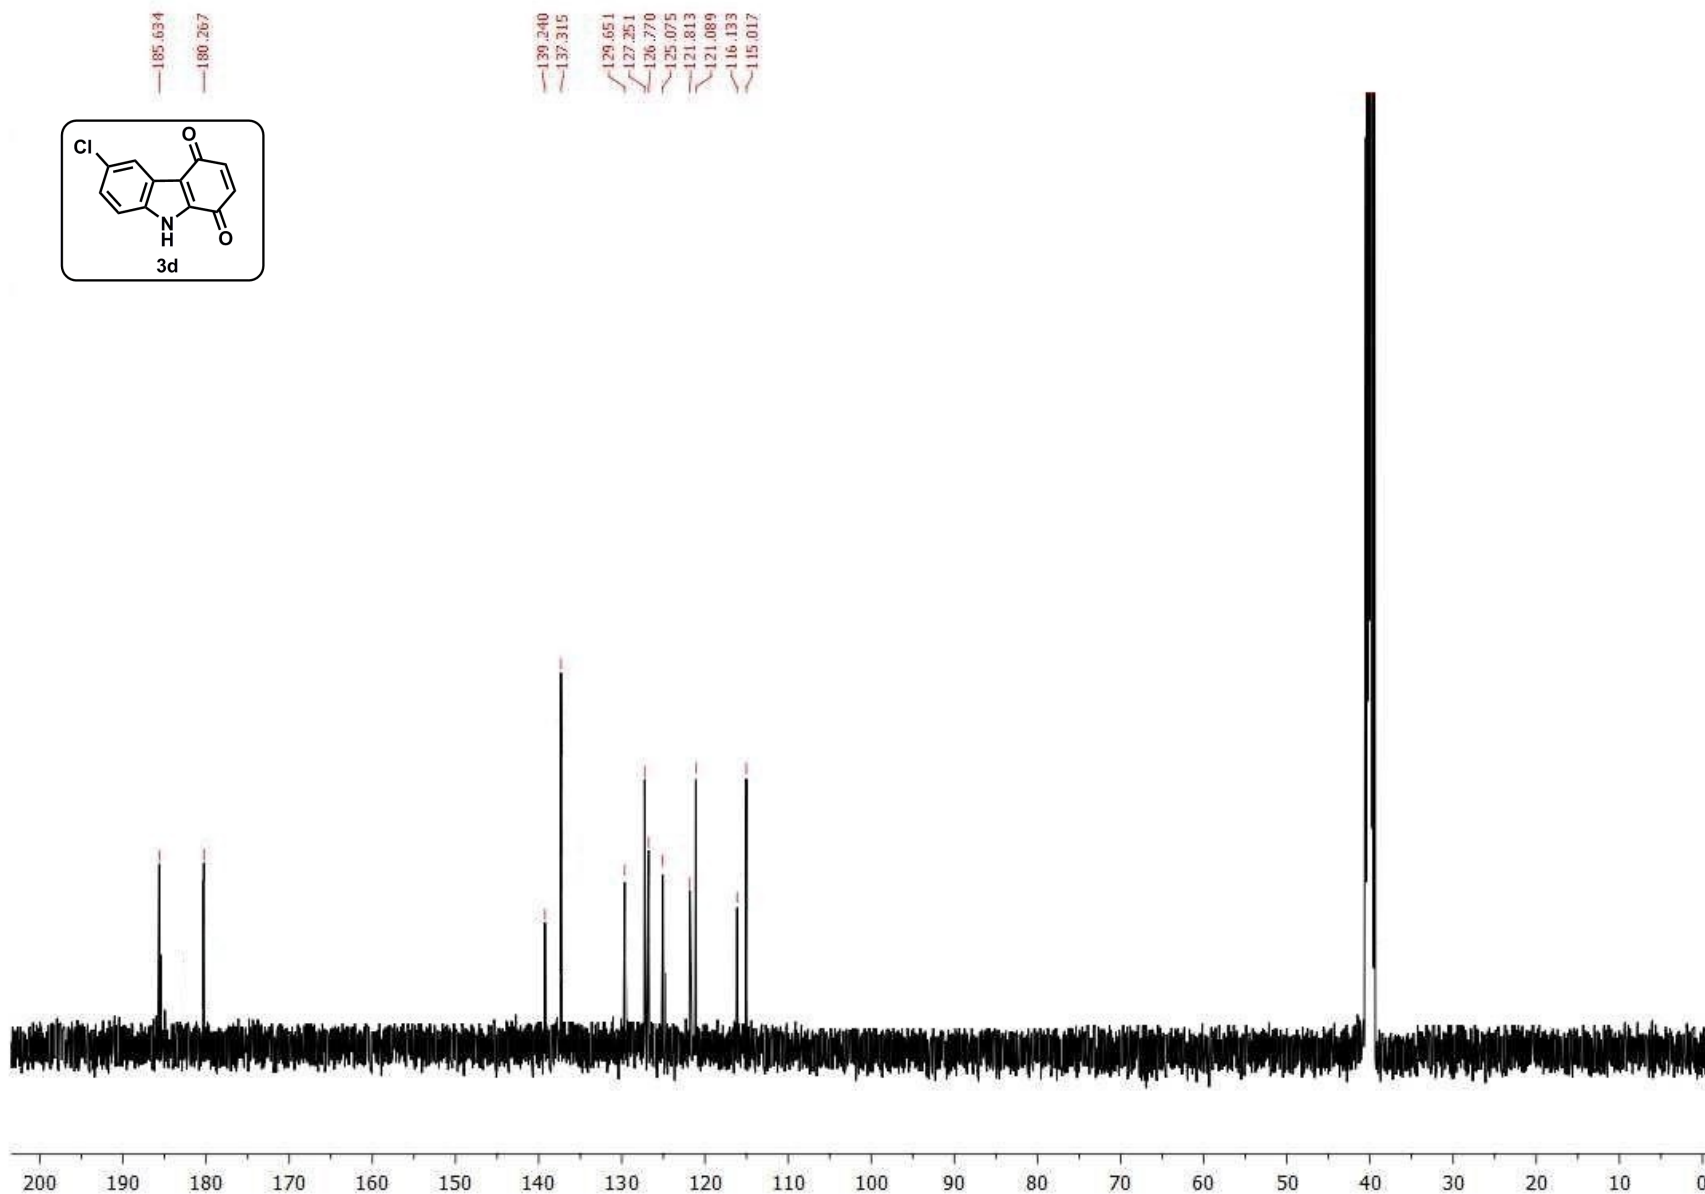



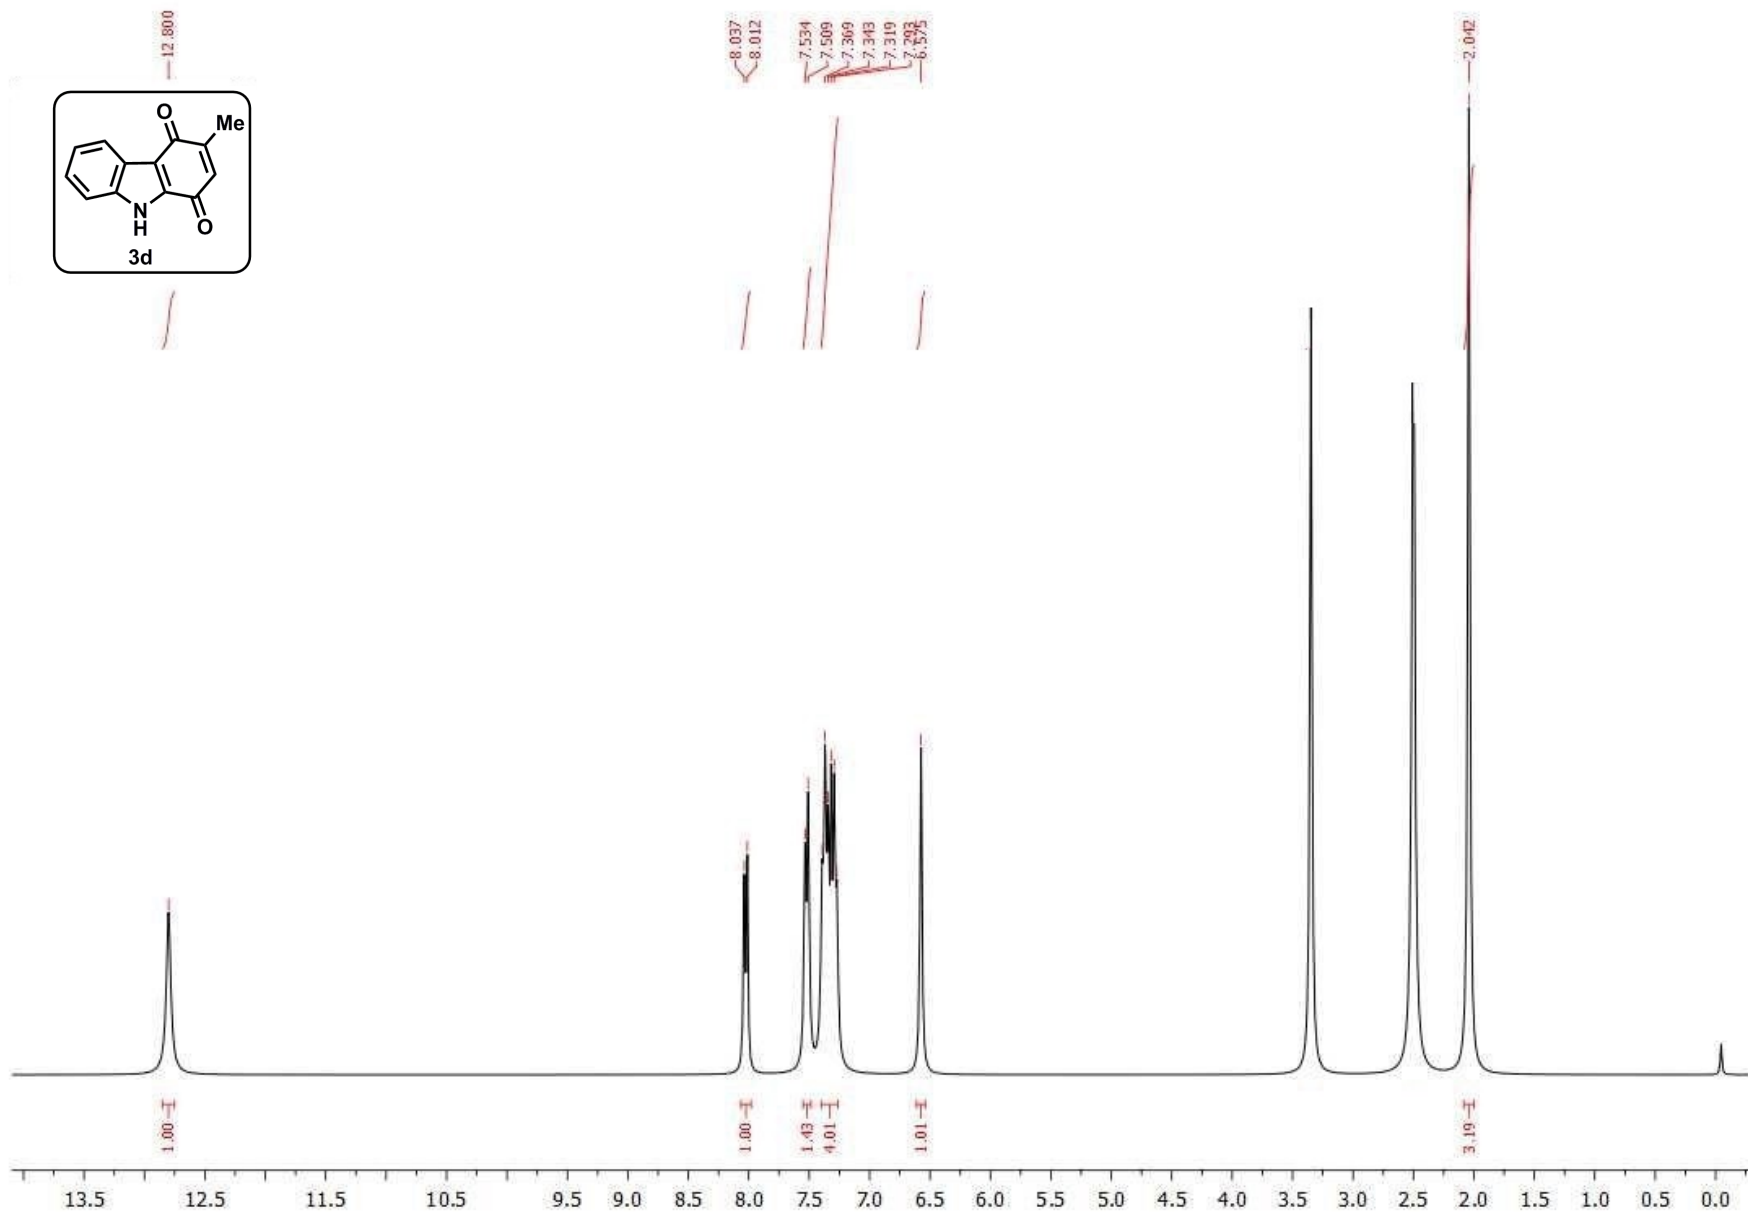

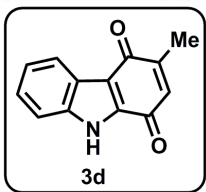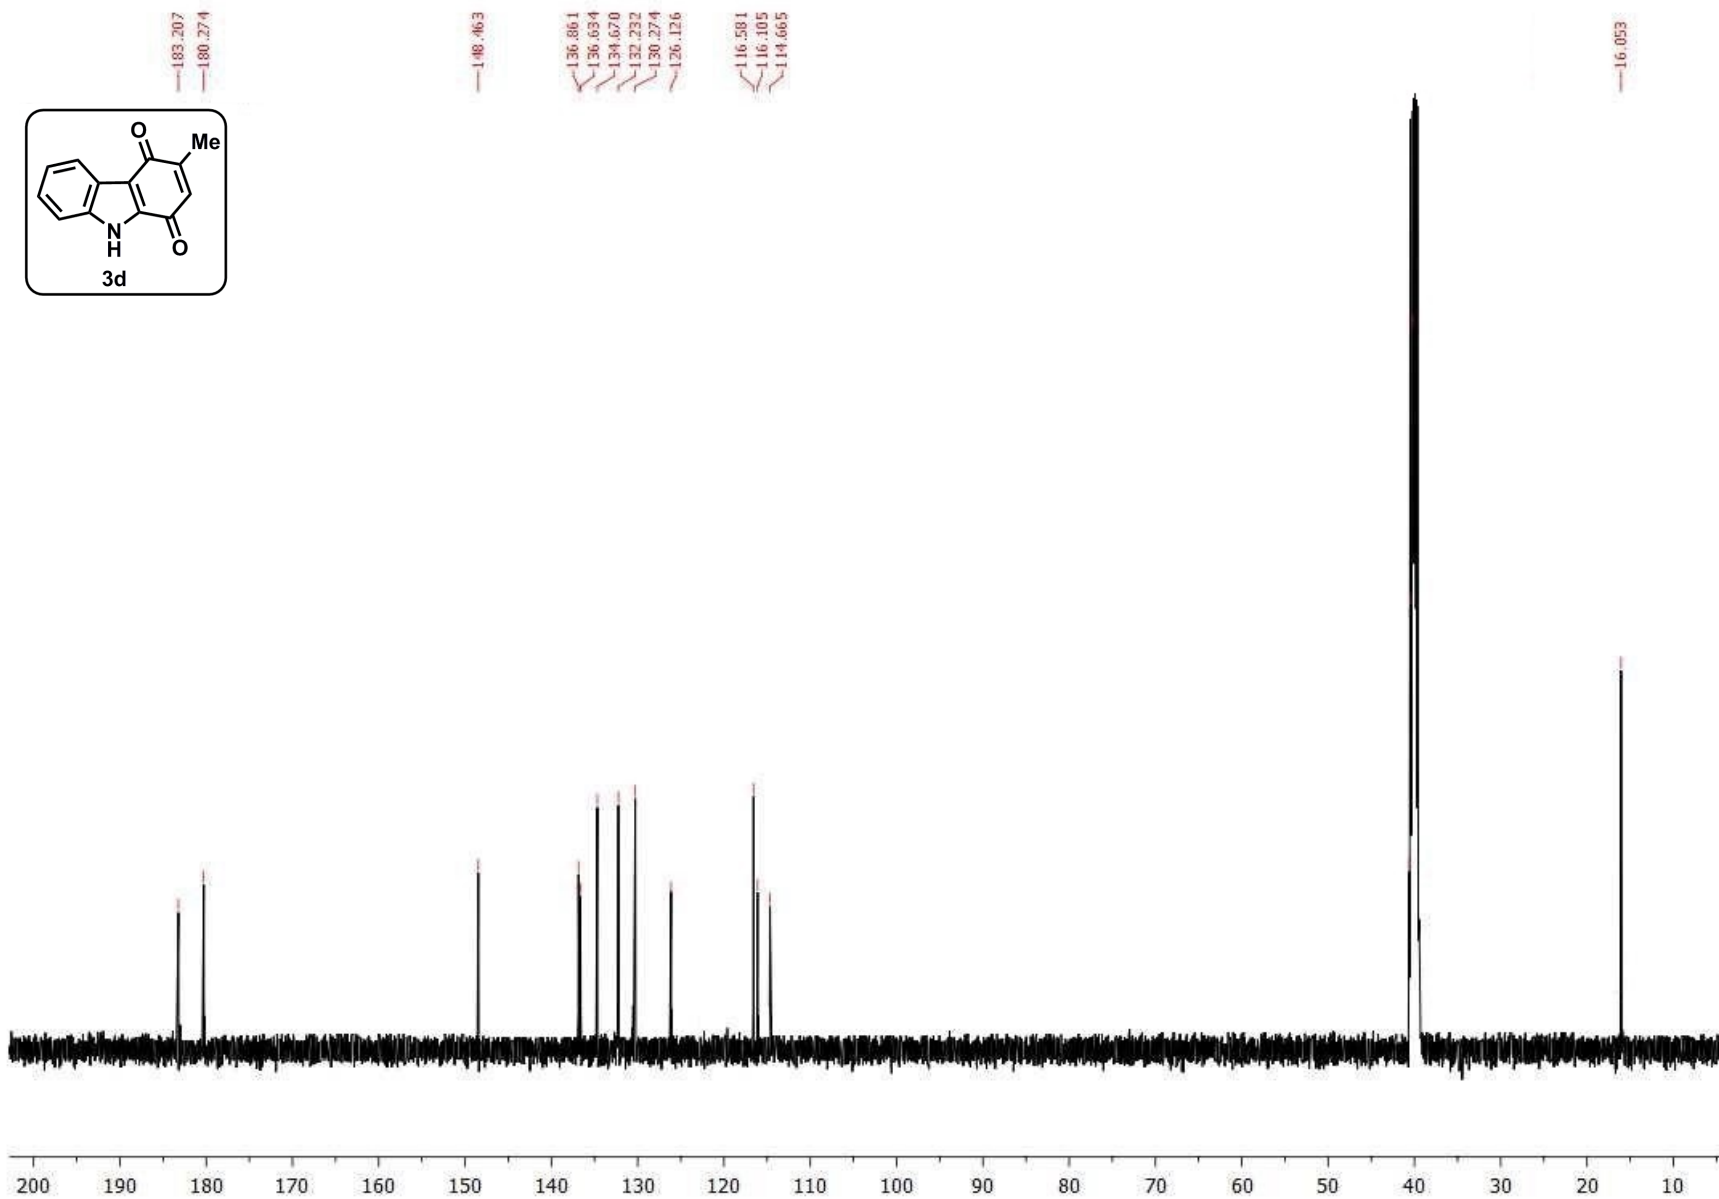

Savitribai Phule Pune University - Central Instrumentation Facility

**Analysis Info**  
 Analysis Name D:\Data\2016\JUNE\SPPU\CHEMISTRY\PD LOKHANDE\MAHAVIR\MS -21\_BC1\_01\_2814.d  
 Method dlc-ms350mz\_10min\_90b.m  
 Sample Name MS -21  
 Comment  
 Acquisition Date 6/7/2016 7:10:08 PM  
 Operator CIF  
 Instrument impact HD 1819696.00184

**Acquisition Parameter**

|             |         |                      |          |                  |           |
|-------------|---------|----------------------|----------|------------------|-----------|
| Source Type | ESI     | Ion Polarity         | Positive | Set Nebulizer    | 0.3 Bar   |
| Focus       | Active  | Set Capillary        | 3500 V   | Set Dry Heater   | 200 °C    |
| Scan Begin  | 50 m/z  | Set End Plate Offset | -500 V   | Set Dry Gas      | 4.0 l/min |
| Scan End    | 600 m/z | Set Charging Voltage | 2000 V   | Set Divert Valve | Waste     |
|             |         | Set Corona           | 0 nA     | Set APCI Heater  | 0 °C      |

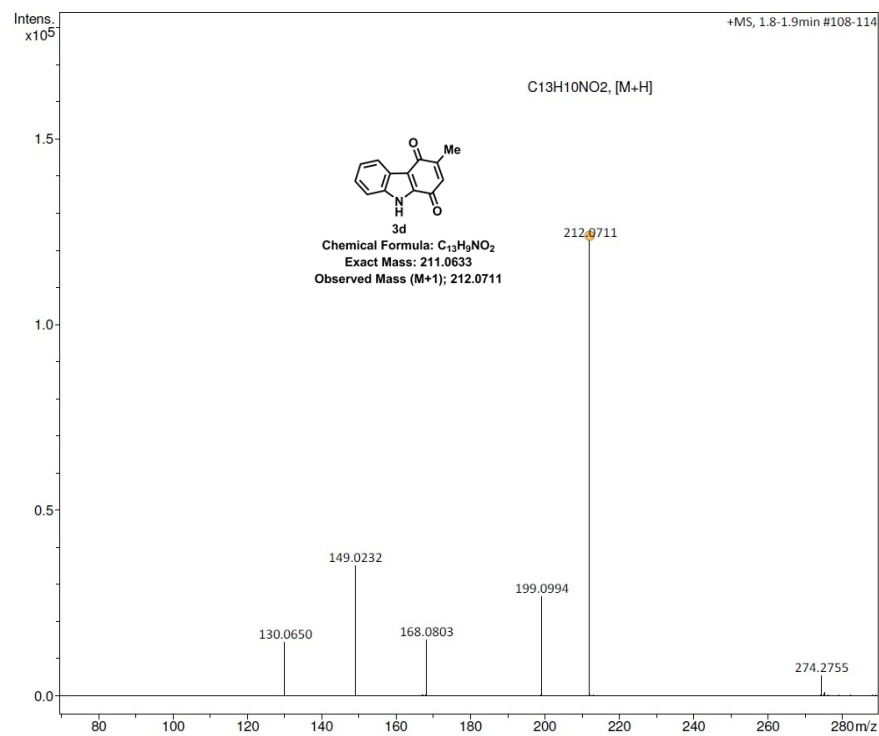

| Meas. m/z | # | Ion Formula | m/z      | err [ppm] | mSigma | # mSigma | Score  | rdb | e <sup>-</sup> | Conf | N-Rule | Adduct |
|-----------|---|-------------|----------|-----------|--------|----------|--------|-----|----------------|------|--------|--------|
| 212.0711  | 1 | C13H10NO2   | 212.0706 | -2.5      | 4.8    | 1        | 100.00 | 9.5 | even           |      | ok     | M+H    |

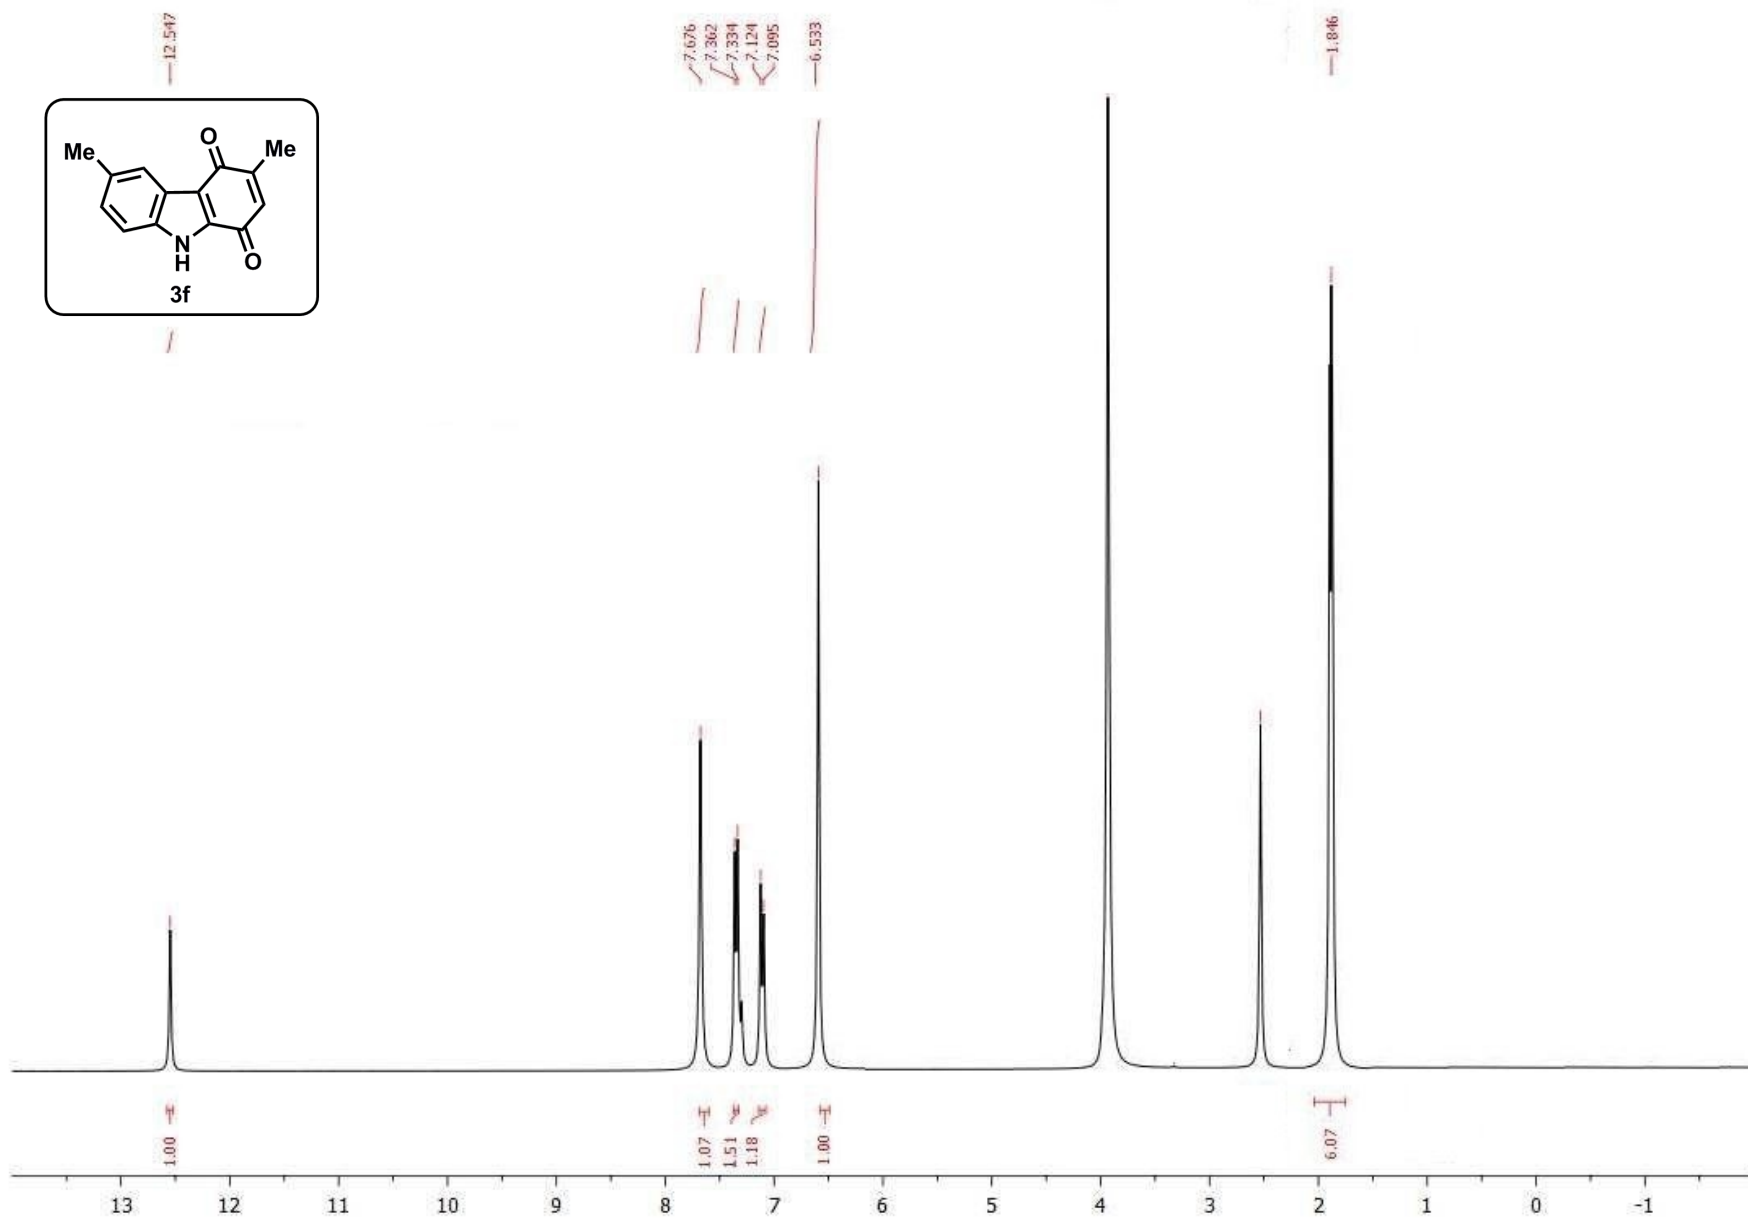

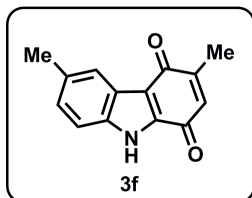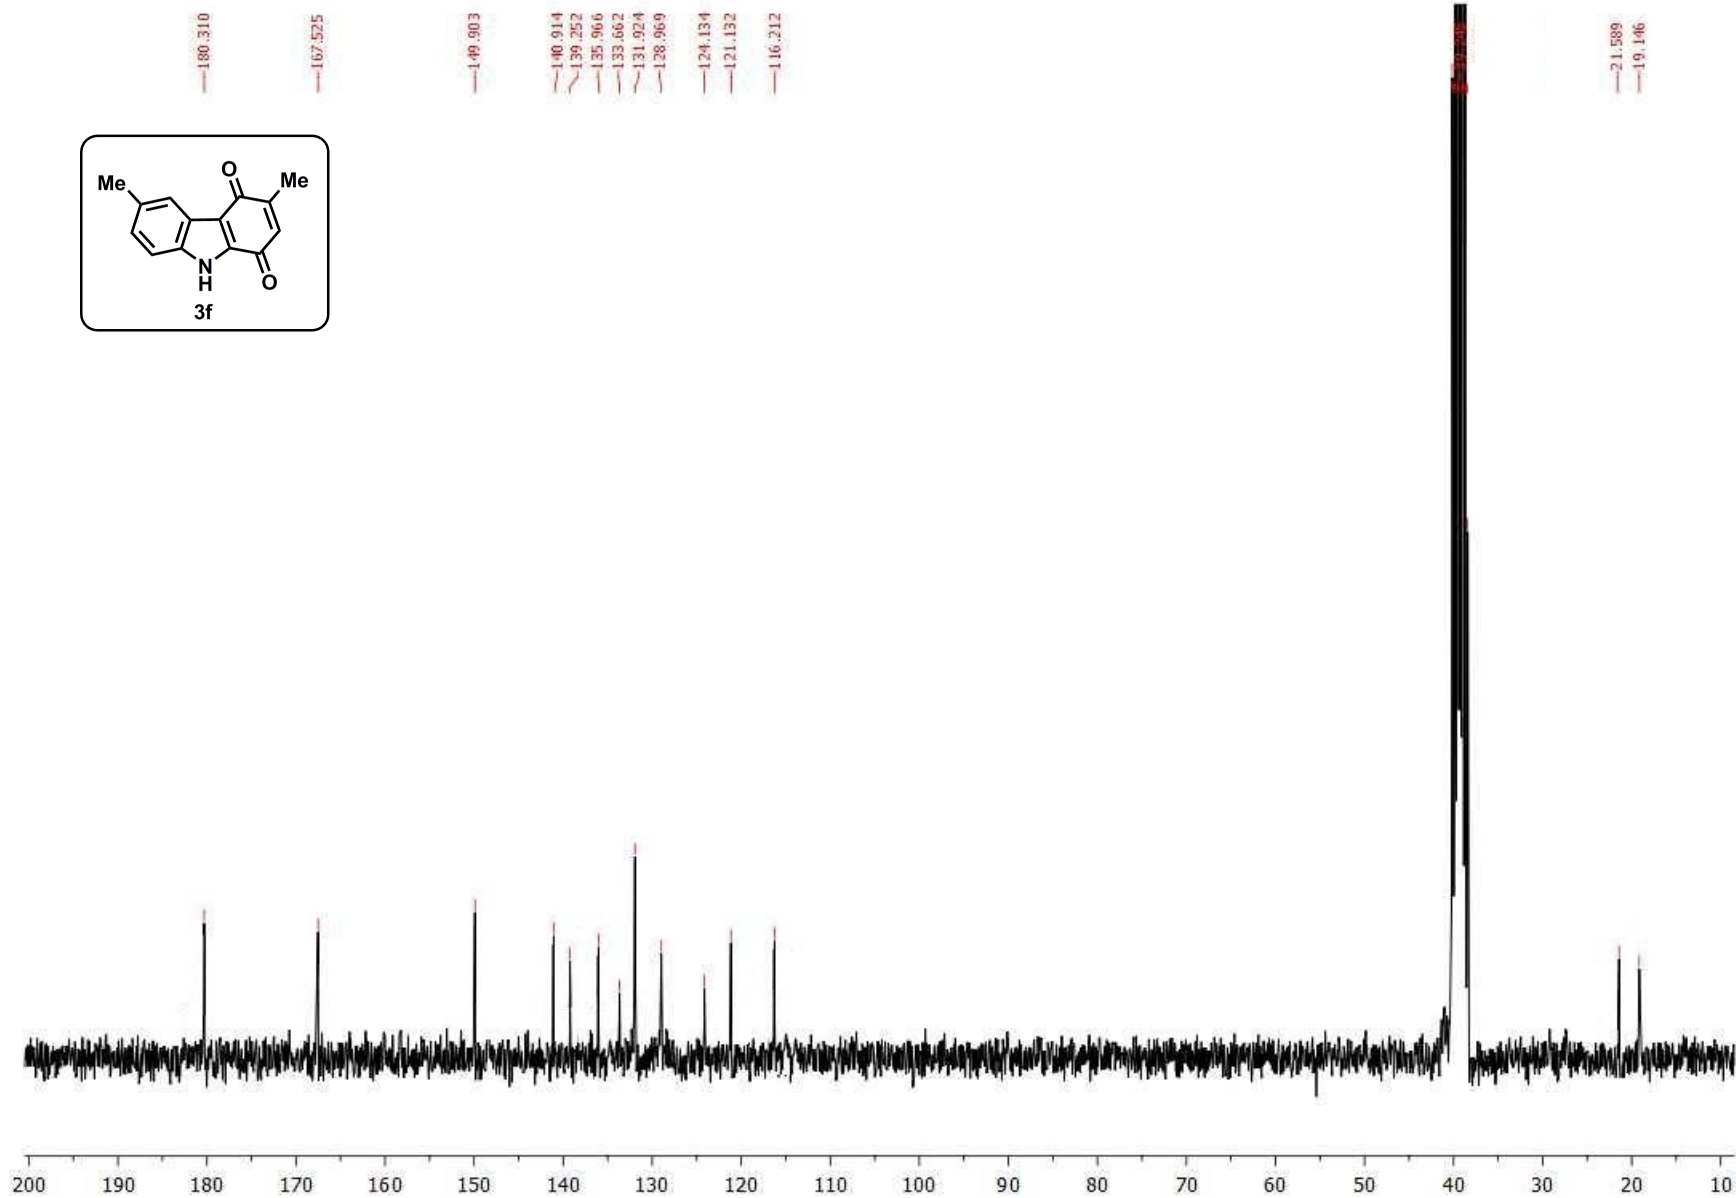

Savitribai Phule Pune University - Central Instrumentation Facility

Analysis Info

Analysis Name D:\Data\2016\JUNE\SPPU\CHEMISTRY\PD LOKHANDE\MAHAVIR\MS -24\_BC4\_01\_2817.d Acquisition Date 6/7/2016 7:42:18 PM  
 Method dlc-ms350mz\_10min\_90b.m Operator CIF  
 Sample Name MS -24 Instrument impact HD 1819696.00184  
 Comment

Acquisition Parameter

|             |         |                      |          |                  |           |
|-------------|---------|----------------------|----------|------------------|-----------|
| Source Type | ESI     | Ion Polarity         | Positive | Set Nebulizer    | 0.3 Bar   |
| Focus       | Active  | Set Capillary        | 3500 V   | Set Dry Heater   | 200 °C    |
| Scan Begin  | 50 m/z  | Set End Plate Offset | -500 V   | Set Dry Gas      | 4.0 l/min |
| Scan End    | 600 m/z | Set Charging Voltage | 2000 V   | Set Divert Valve | Waste     |
|             |         | Set Corona           | 0 nA     | Set APCI Heater  | 0 °C      |

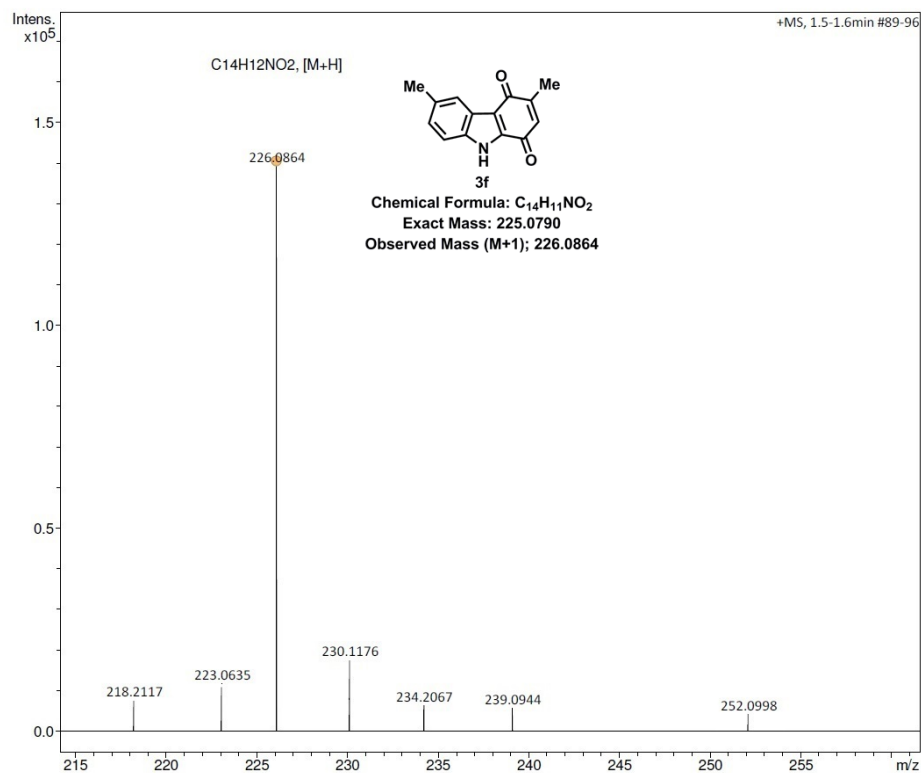

| Meas. m/z | # | Ion Formula                                     | m/z      | err [ppm] | mSigma | # mSigma | Score  | rdb | e <sup>-</sup> Conf | N-Rule | Adduct |
|-----------|---|-------------------------------------------------|----------|-----------|--------|----------|--------|-----|---------------------|--------|--------|
| 226.0864  | 1 | C <sub>14</sub> H <sub>12</sub> NO <sub>2</sub> | 226.0863 | -0.5      | 15.4   | 1        | 100.00 | 9.5 | even                | ok     | M+H    |

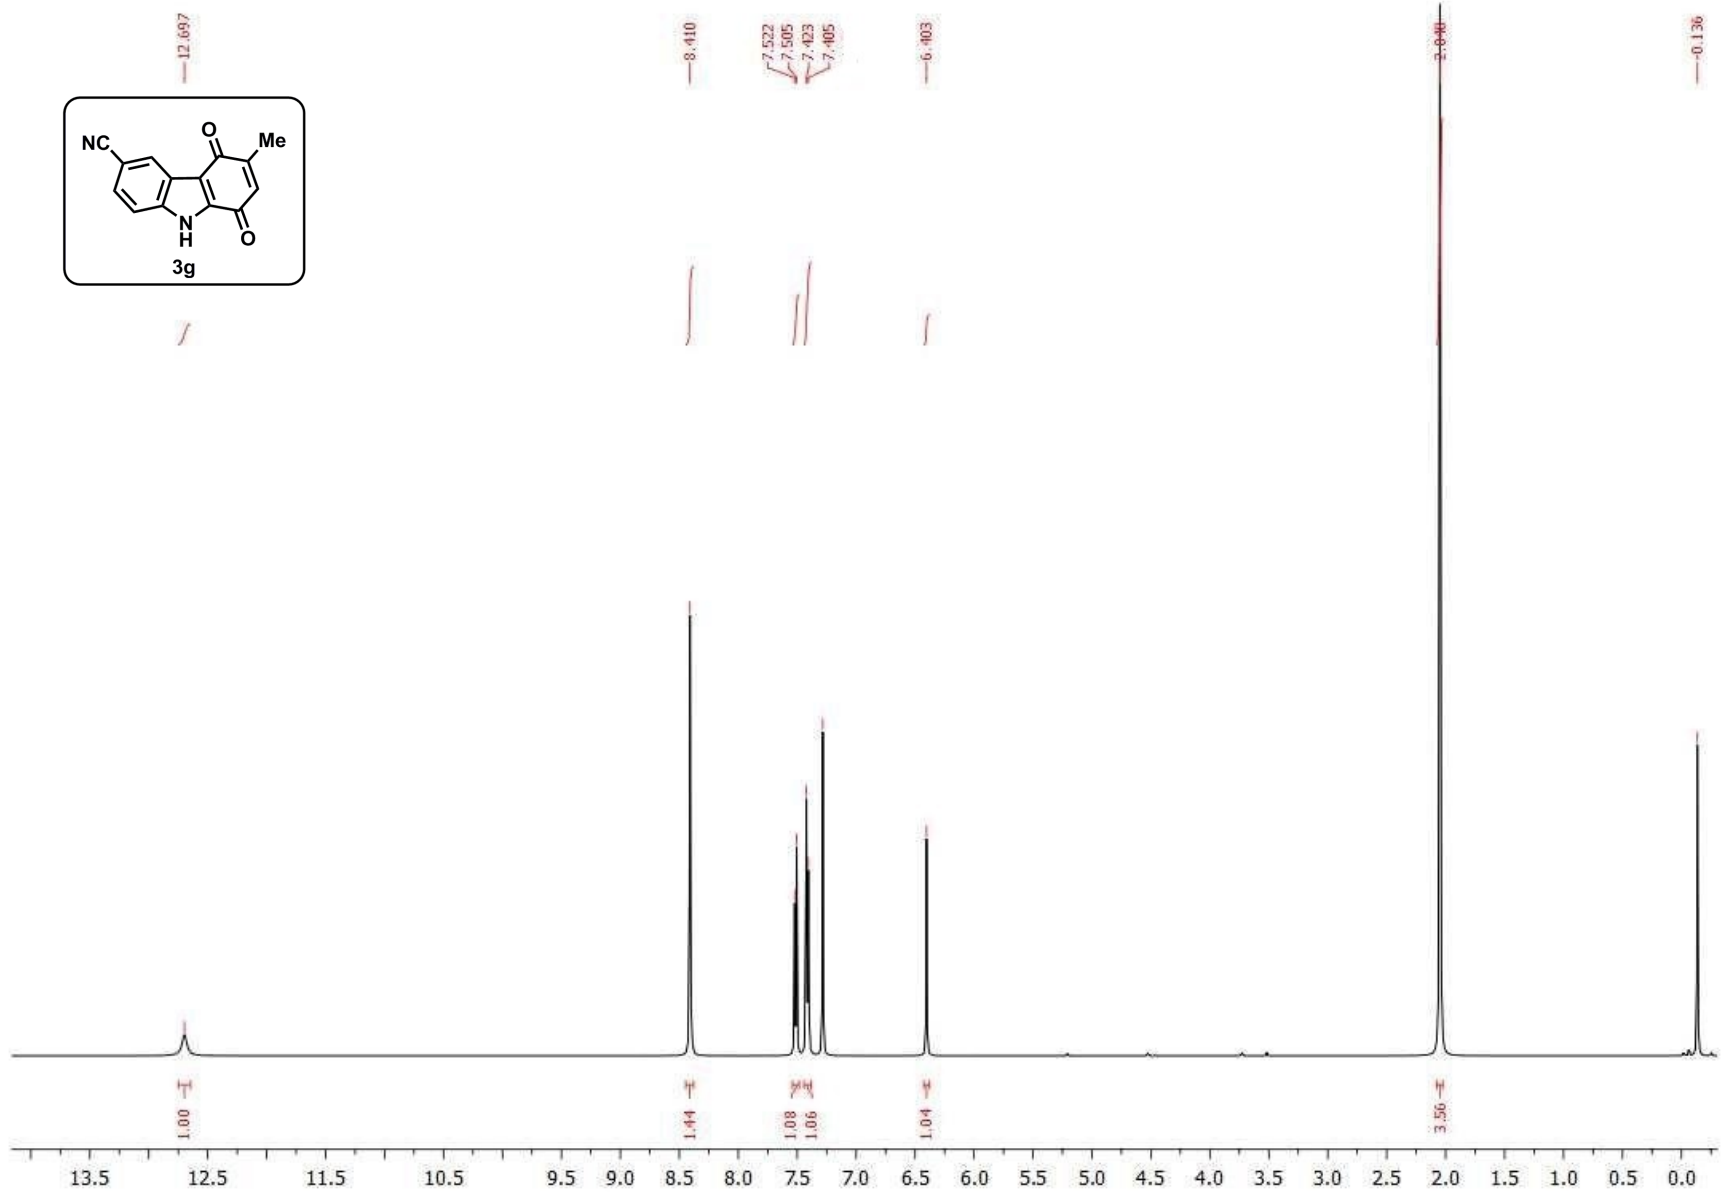

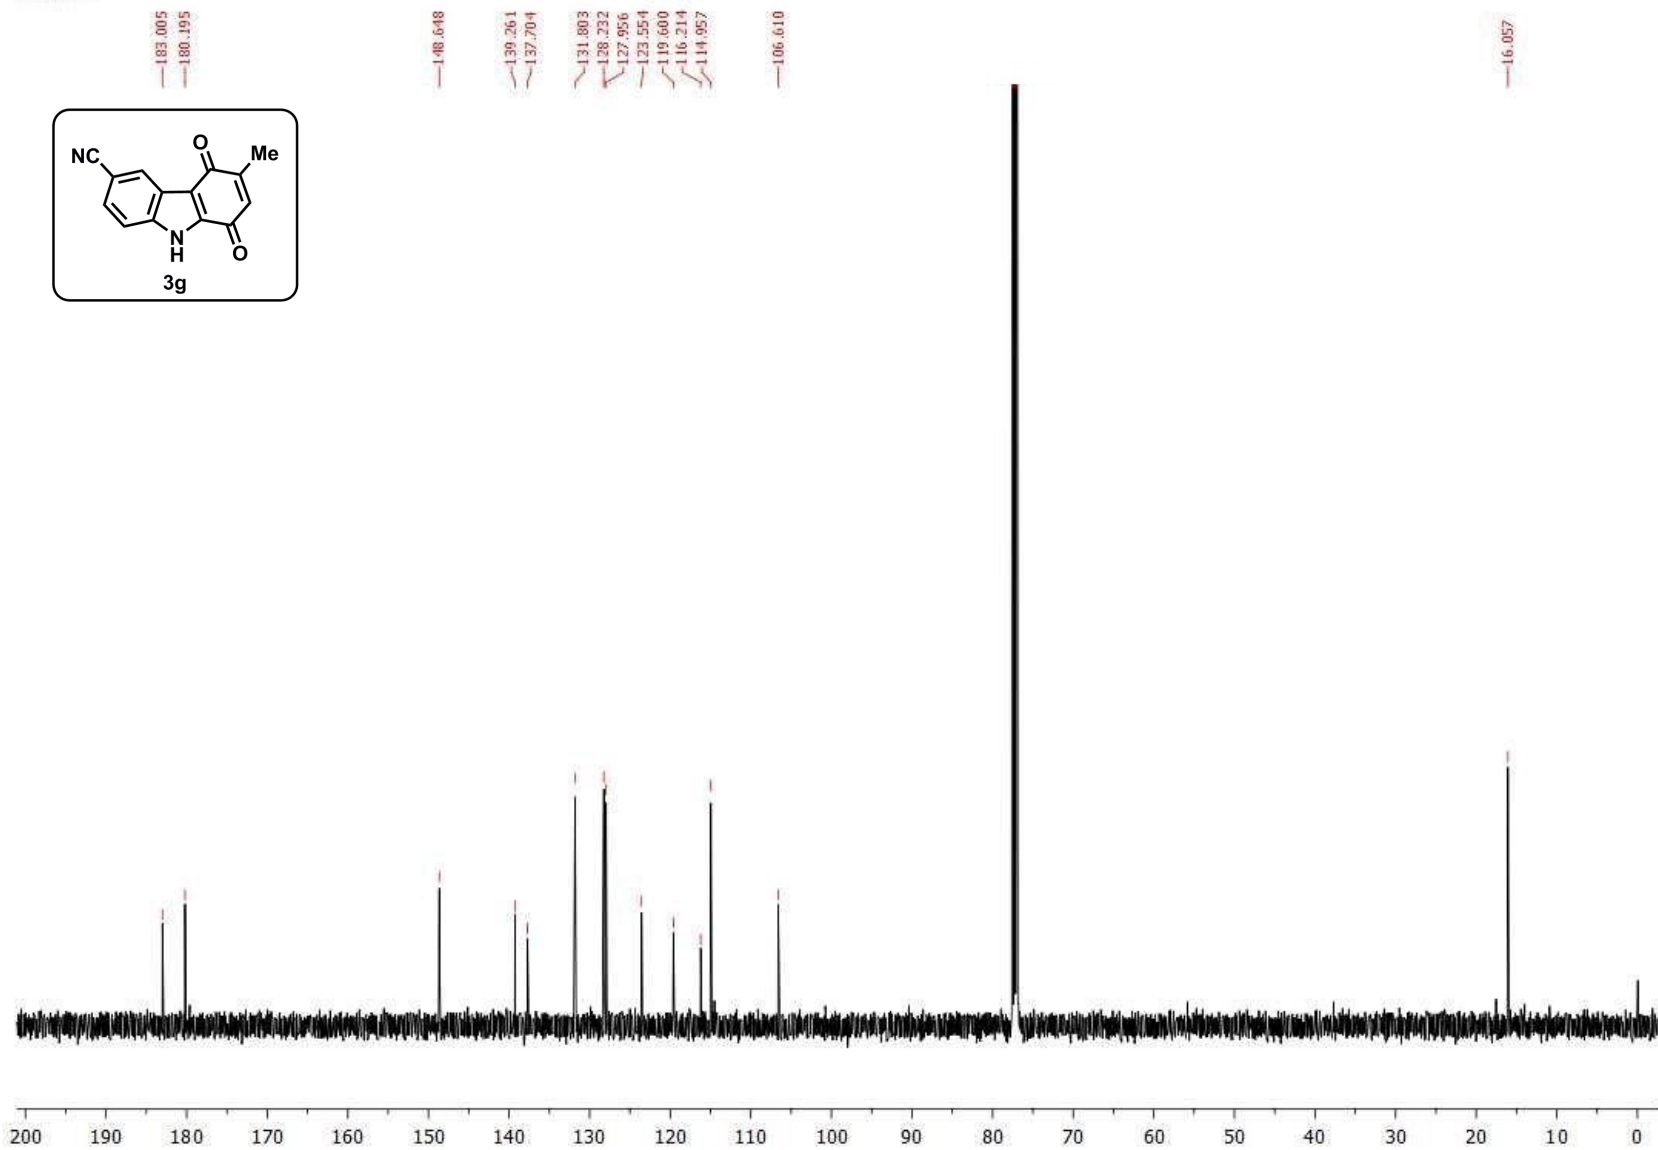



Savitribai Phule Pune University - Central Instrumentation Facility

**Analysis Info**  
 Analysis Name D:\Data\2016\JUNE\SPPU\CHEMISTRY\PD LOKHANDE\MAHAVIR\MS-22\_BC2\_01\_2804.d Acquisition Date 6/6/2016 8:39:13 PM  
 Method dlc-ms350mz\_10min\_90b.m Operator CIF  
 Sample Name MS-22 Instrument impact HD 1819696.00184  
 Comment

**Acquisition Parameter**

|             |         |                      |          |                  |           |
|-------------|---------|----------------------|----------|------------------|-----------|
| Source Type | ESI     | Ion Polarity         | Positive | Set Nebulizer    | 0.3 Bar   |
| Focus       | Active  | Set Capillary        | 3500 V   | Set Dry Heater   | 200 °C    |
| Scan Begin  | 50 m/z  | Set End Plate Offset | -500 V   | Set Dry Gas      | 4.0 l/min |
| Scan End    | 600 m/z | Set Charging Voltage | 2000 V   | Set Divert Valve | Waste     |
|             |         | Set Corona           | 0 nA     | Set APCI Heater  | 0 °C      |

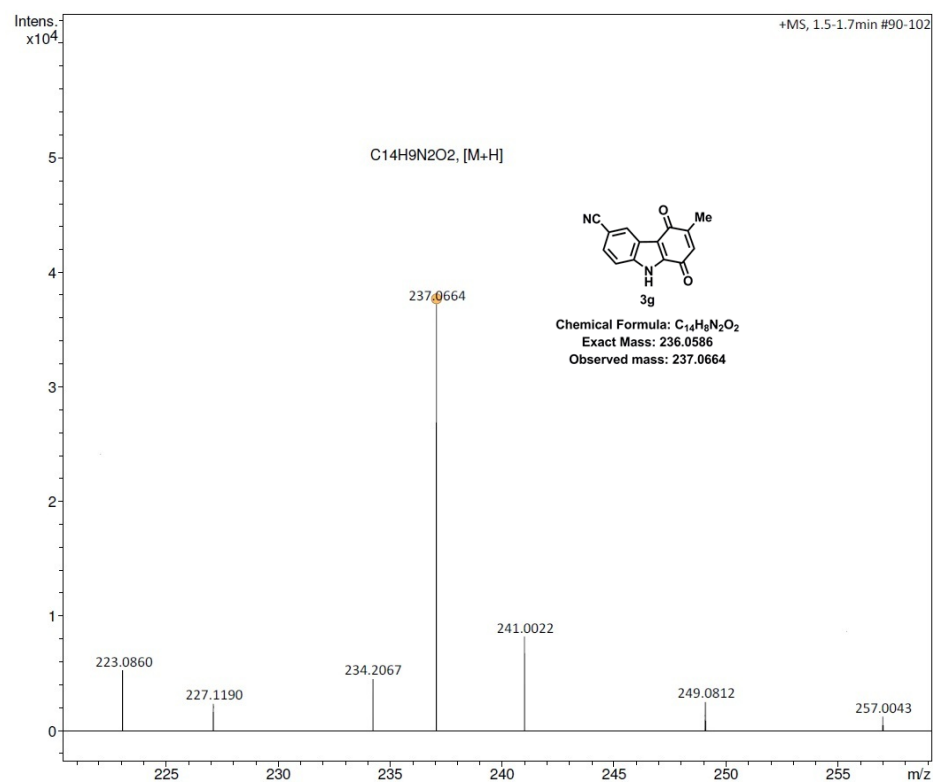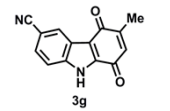

Chemical Formula: C<sub>14</sub>H<sub>9</sub>N<sub>2</sub>O<sub>2</sub>  
 Exact Mass: 236.0586  
 Observed mass: 237.0664

| Meas. m/z | # | Ion Formula                                                  | m/z      | err [ppm] | mSigma | # mSigma | Score  | rdb  | e <sup>-</sup> | Conf | N-Rule | Adduct |
|-----------|---|--------------------------------------------------------------|----------|-----------|--------|----------|--------|------|----------------|------|--------|--------|
| 237.0664  | 1 | C <sub>14</sub> H <sub>9</sub> N <sub>2</sub> O <sub>2</sub> | 237.0659 | -2.4      | 27.3   | 1        | 100.00 | 11.5 | even           |      | ok     | M+H    |

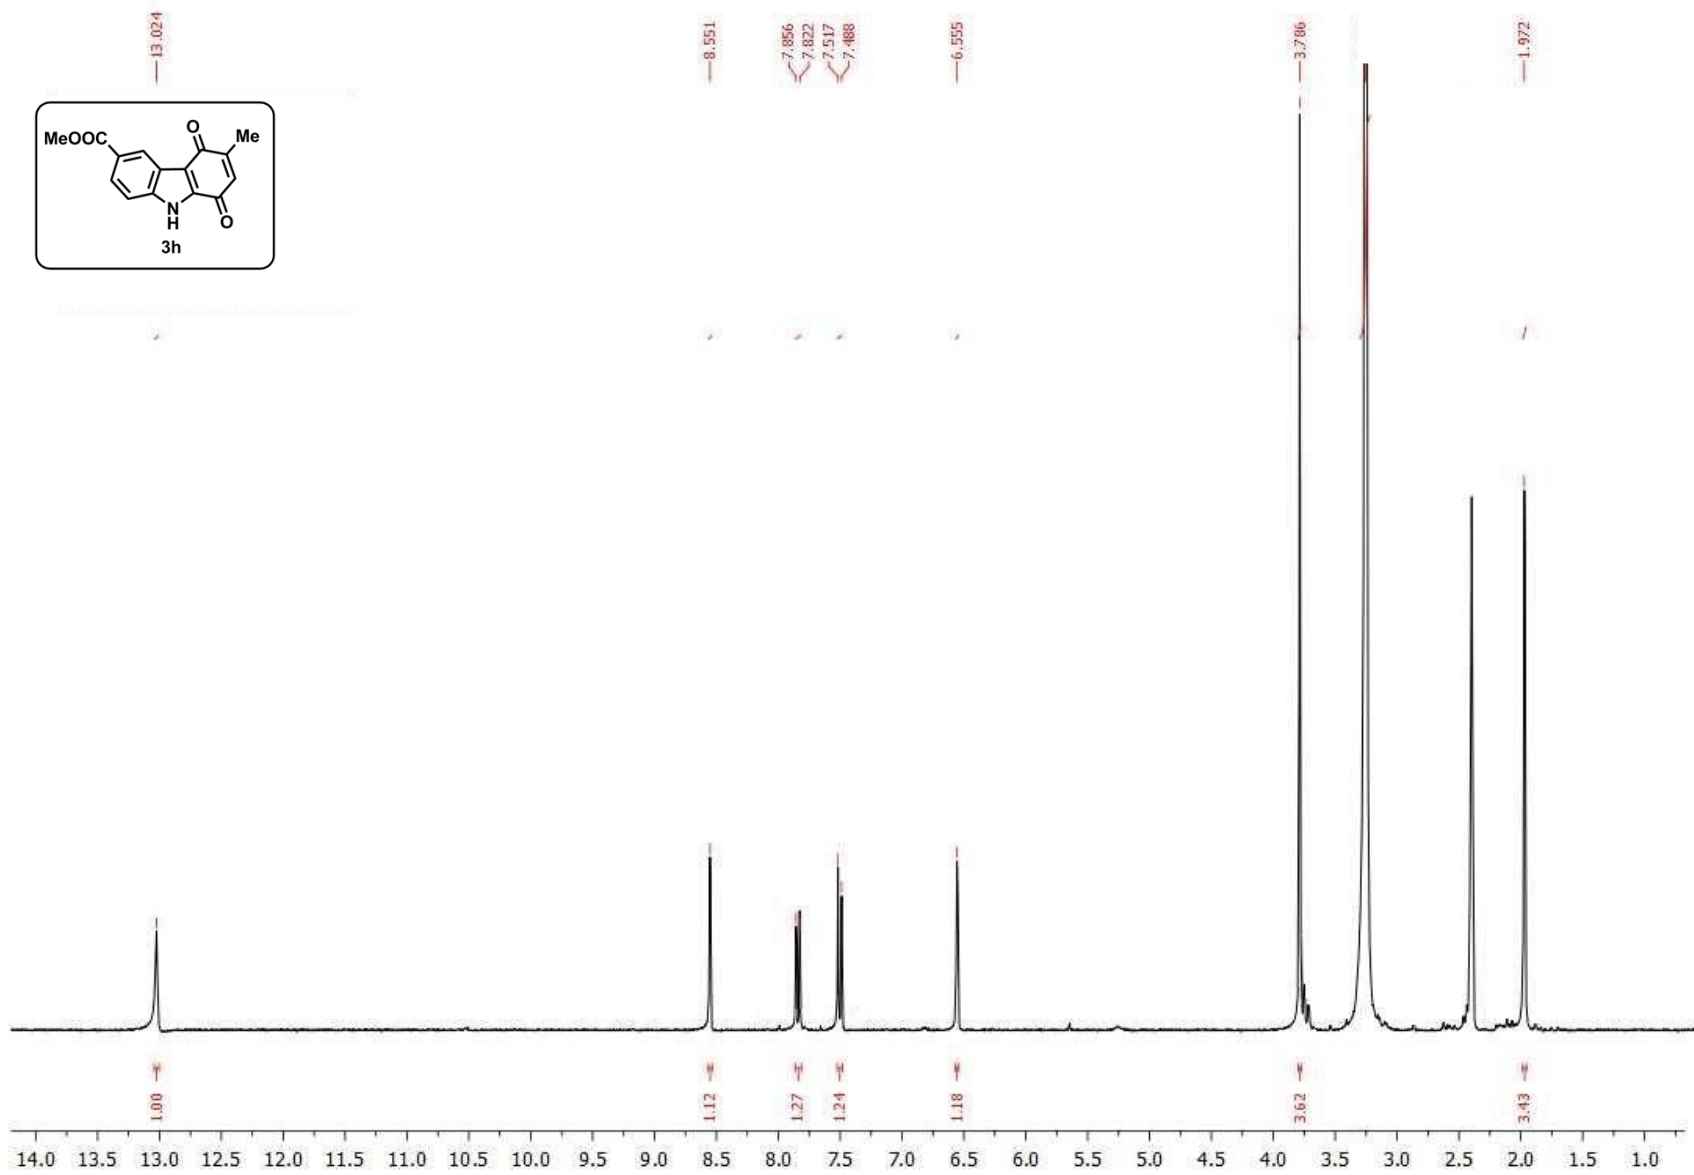

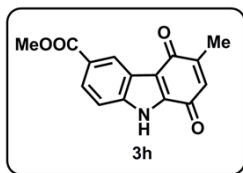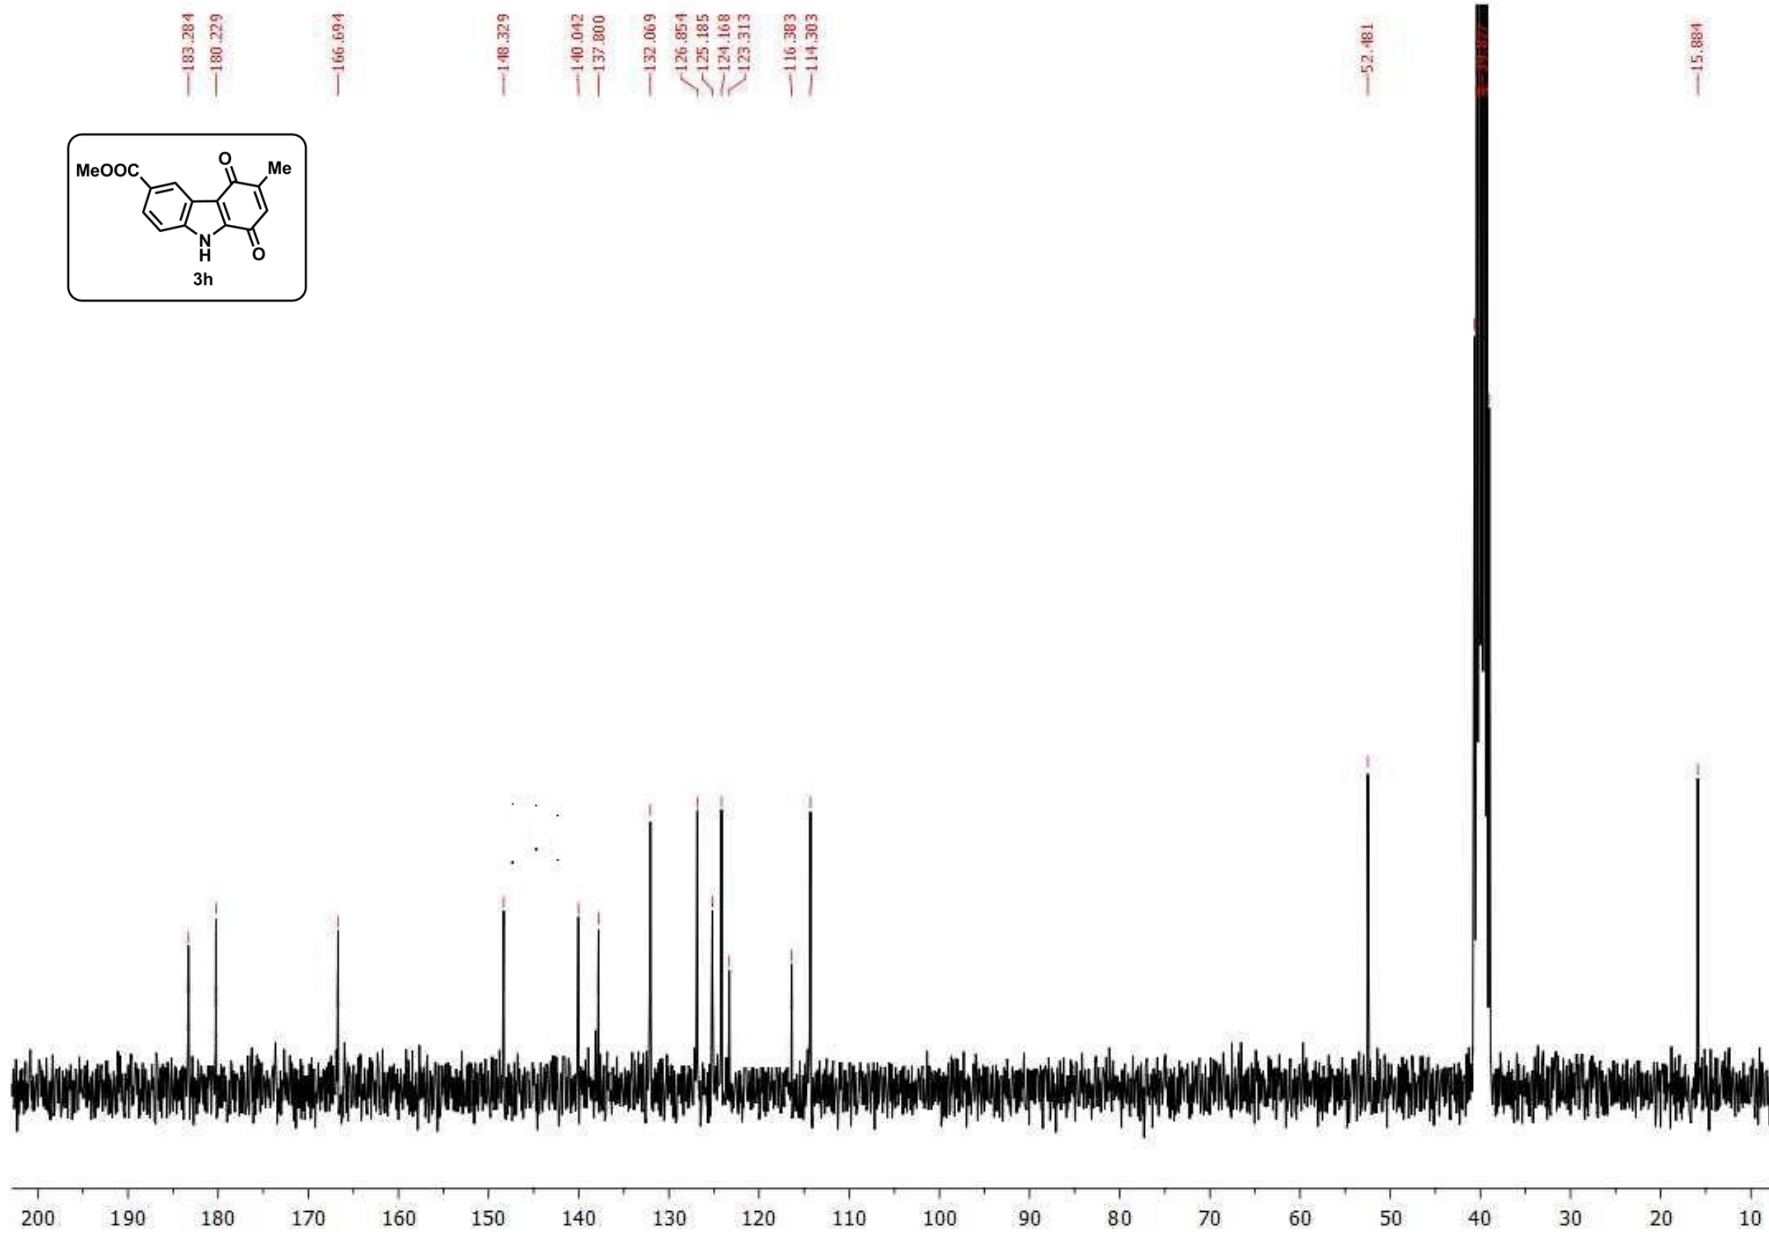

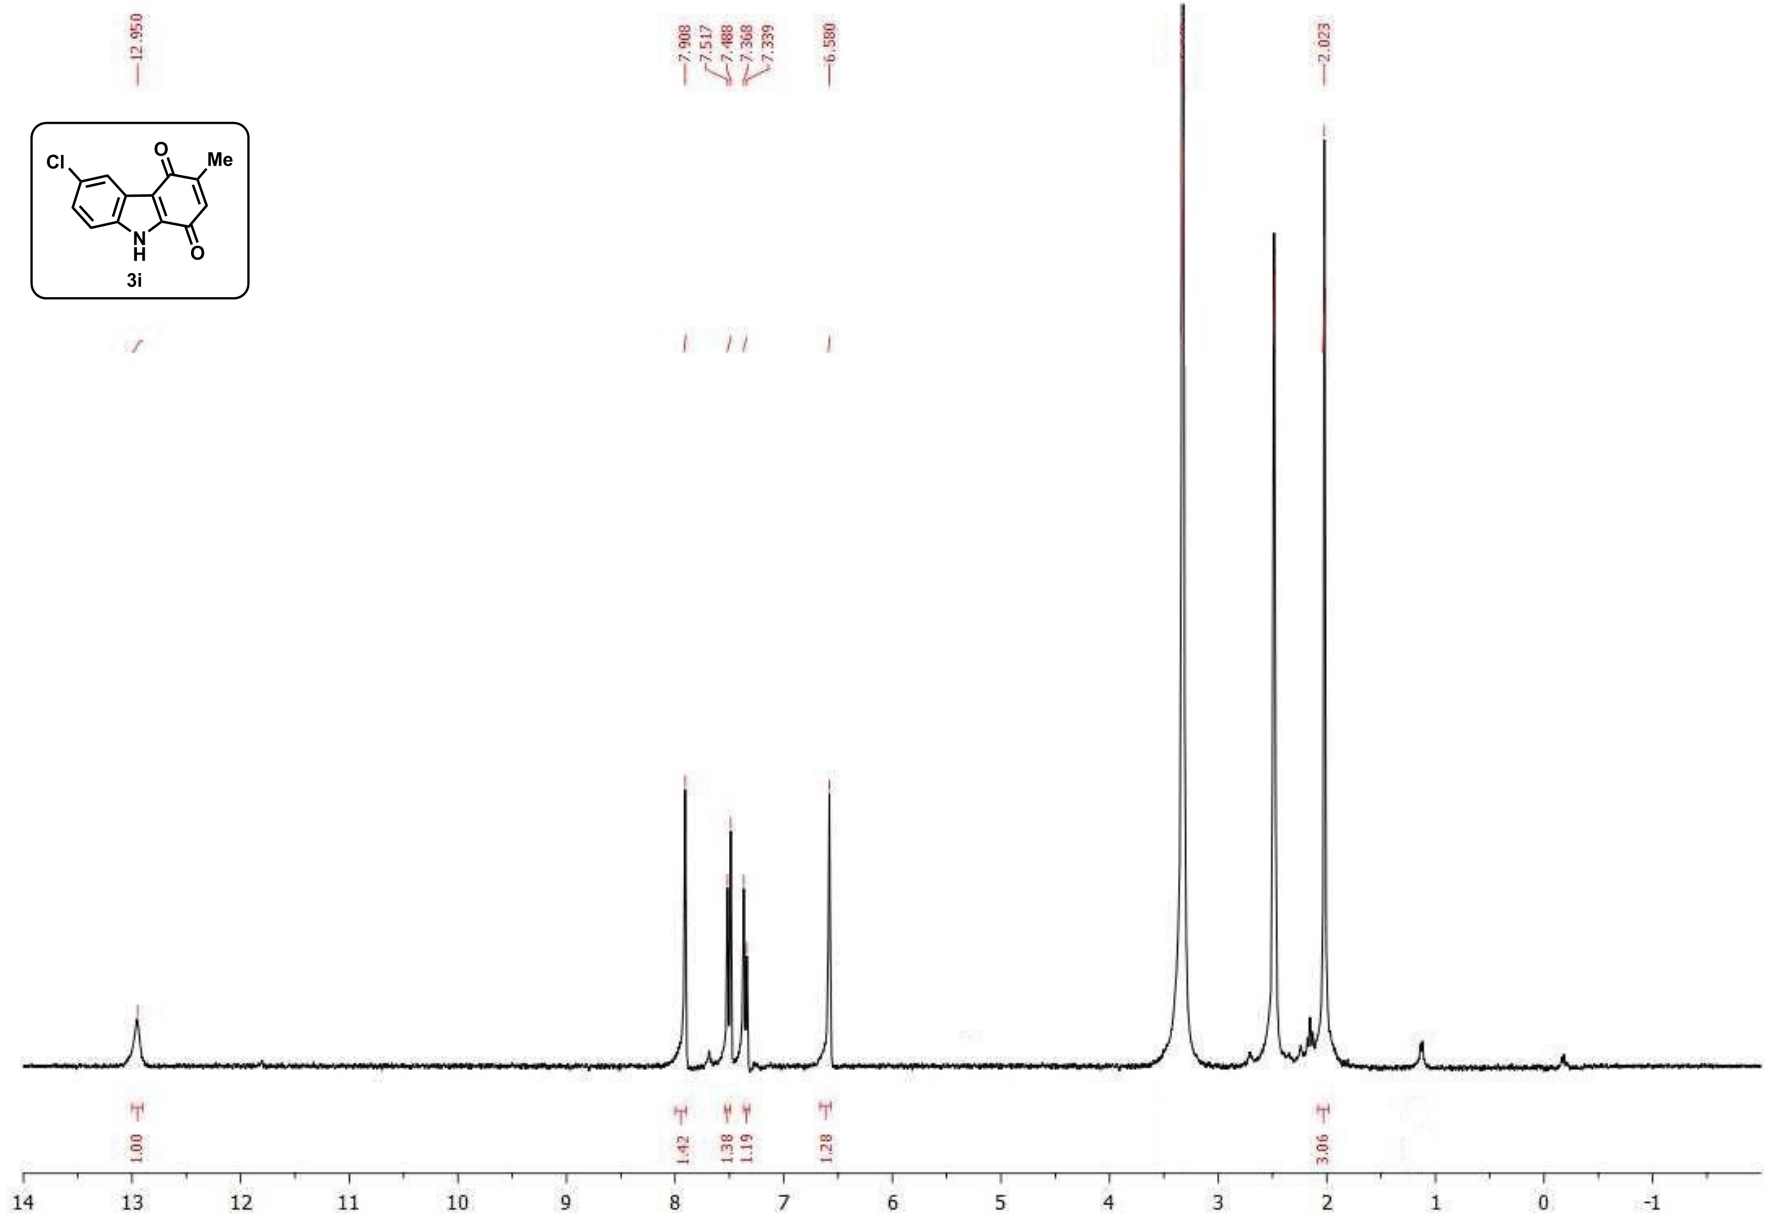

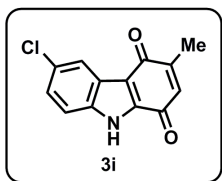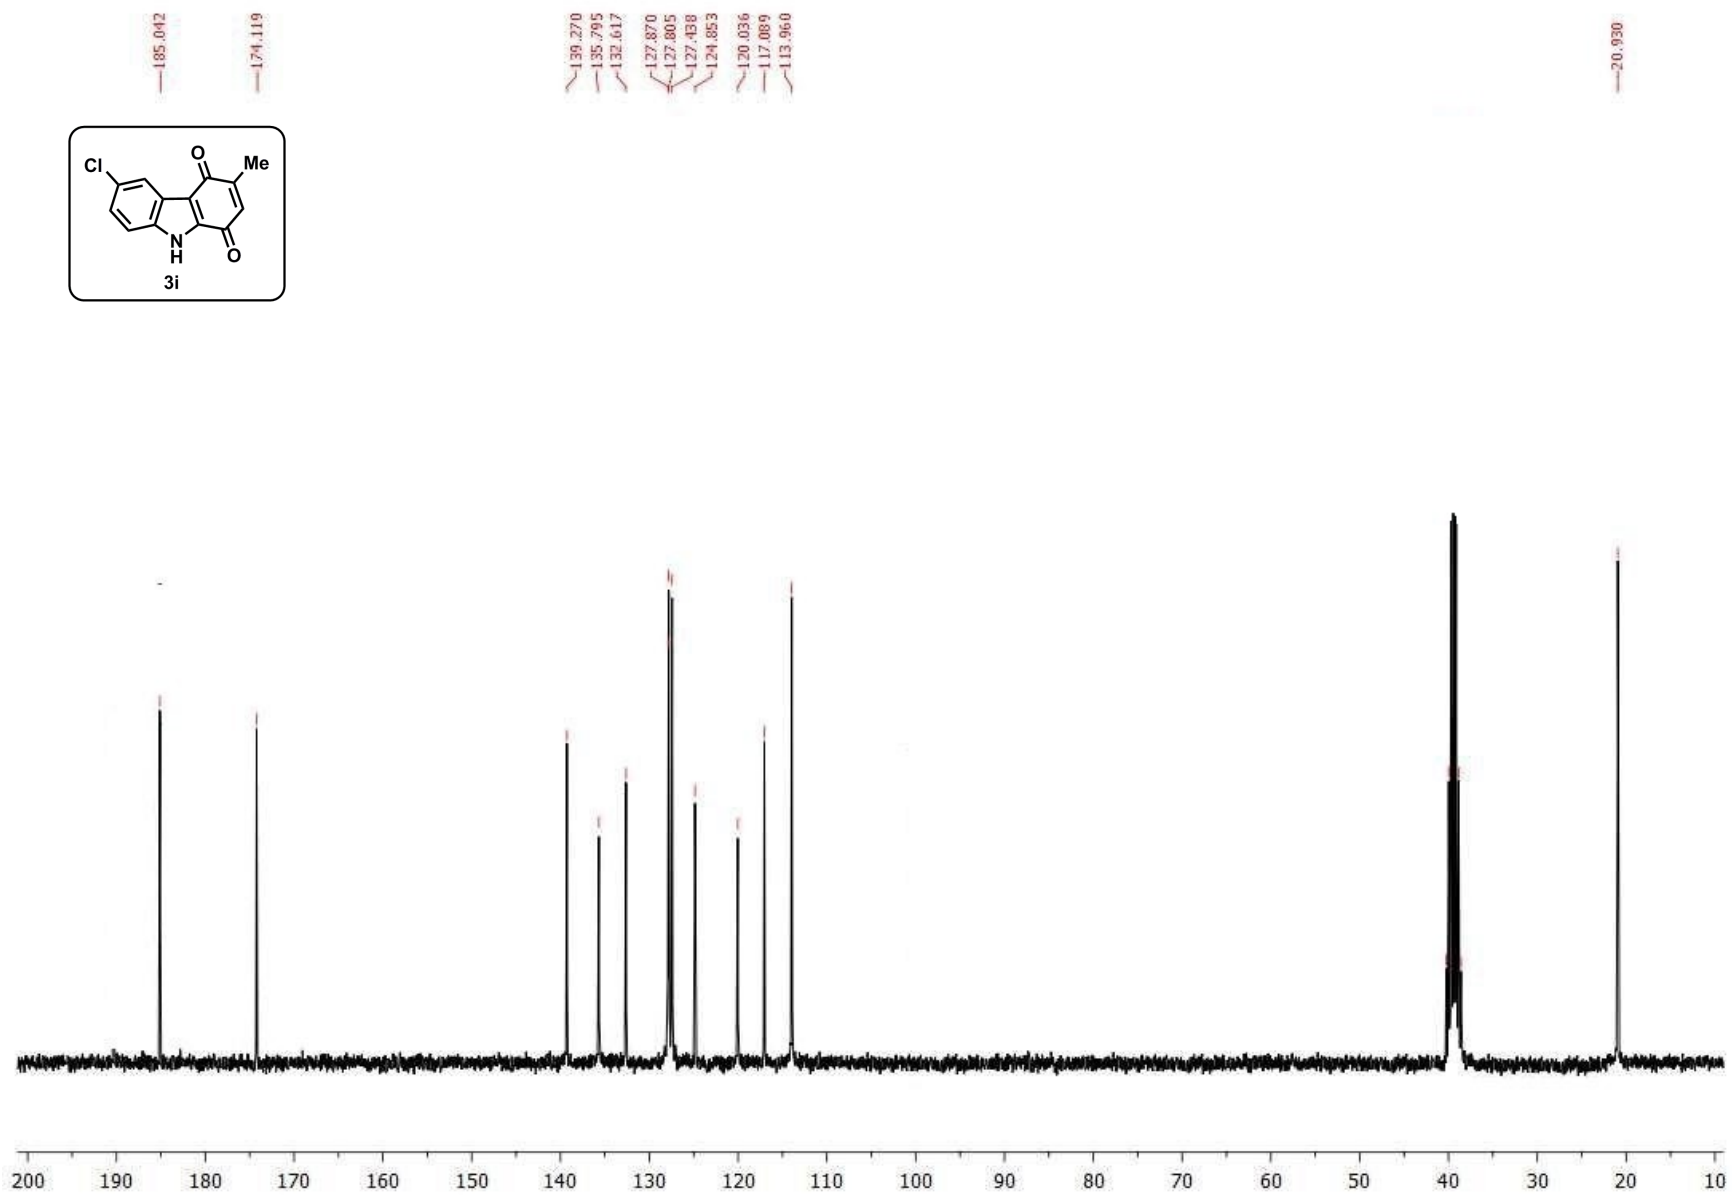

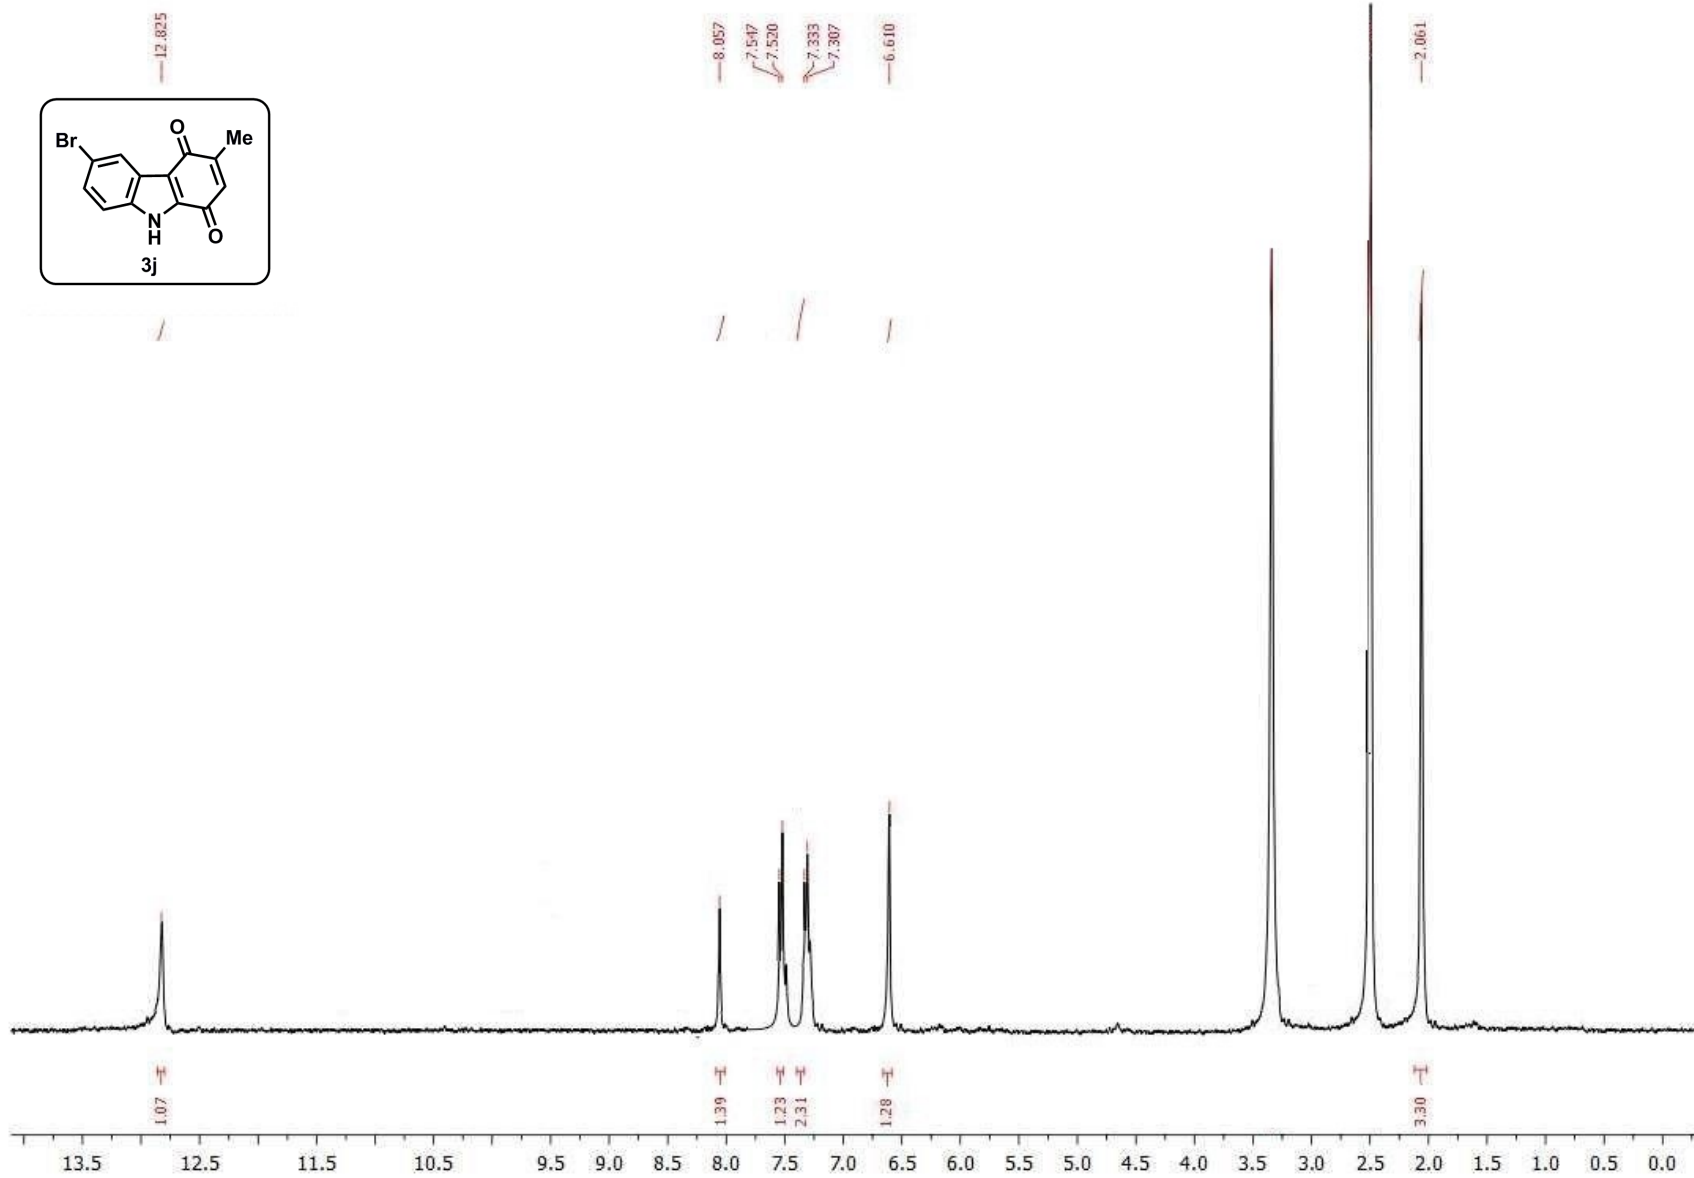

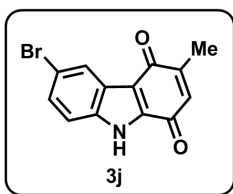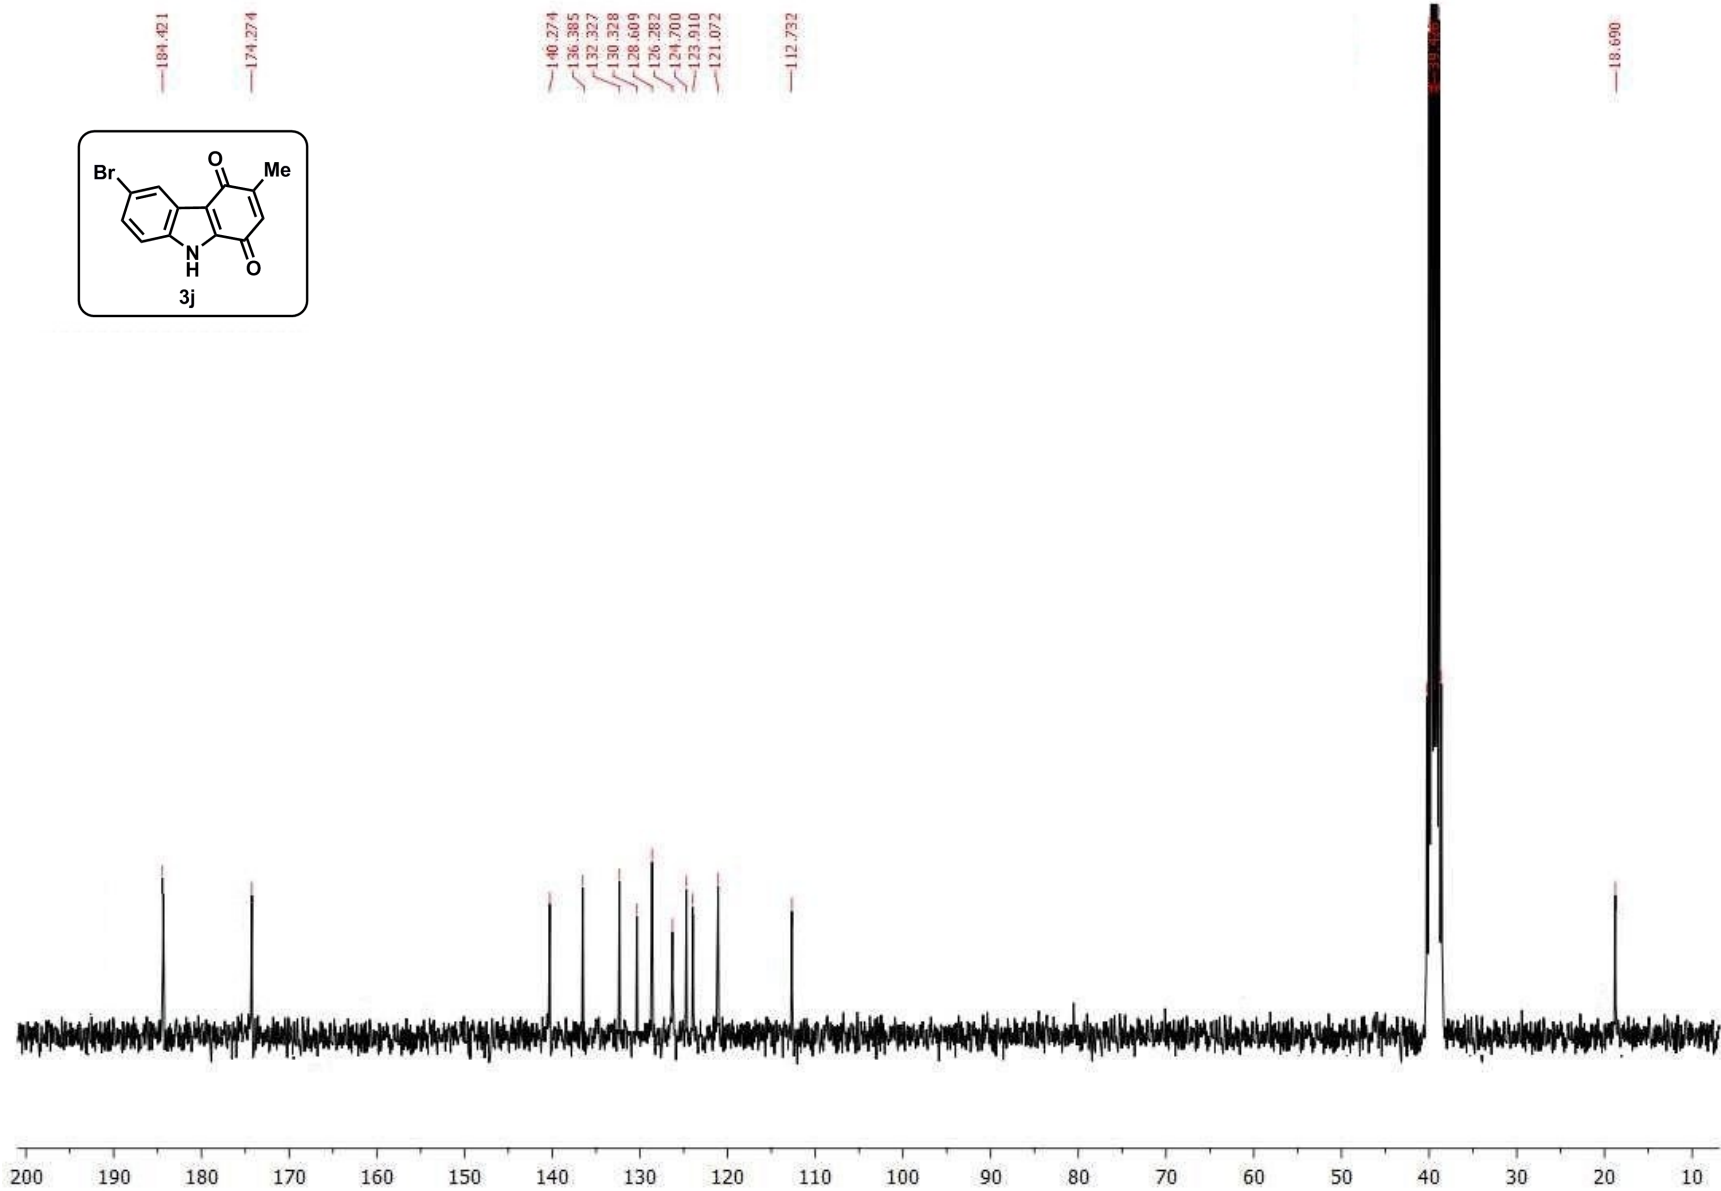

Savitribai Phule Pune University - Central Instrumentation Facility

**Analysis Info**  
 Analysis Name D:\Data\2016\JUNE\SPPU\CHEMISTRY\PD LOKHANDE\MAHAVIR\MS -23\_BC3\_01\_2816.d  
 Method dlc-ms350mz\_10min\_90b.m  
 Sample Name MS -23  
 Comment  
 Acquisition Date 6/7/2016 7:31:35 PM  
 Operator CIF  
 Instrument impact HD 1819696.00184

**Acquisition Parameter**  
 Source Type ESI Ion Polarity Positive Set Nebulizer 0.3 Bar  
 Focus Active Set Capillary 3500 V Set Dry Heater 200 °C  
 Scan Begin 50 m/z Set End Plate Offset -500 V Set Dry Gas 4.0 l/min  
 Scan End 600 m/z Set Charging Voltage 2000 V Set Divert Valve Waste  
 Set Corona 0 nA Set APCI Heater 0 °C

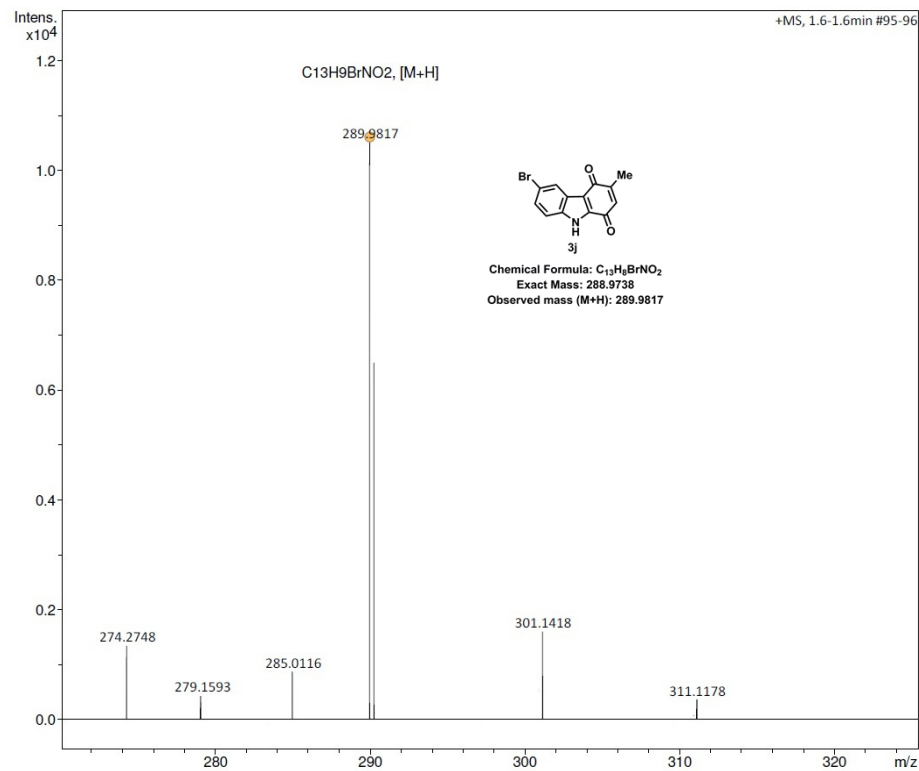

| Meas. m/z | # | Ion Formula                                      | m/z      | err [ppm] | mSigma | # | mSigma | Score | rdb  | e <sup>-</sup> | Conf | N-Rule | Adduct |
|-----------|---|--------------------------------------------------|----------|-----------|--------|---|--------|-------|------|----------------|------|--------|--------|
| 289.9817  | 1 | C <sub>13</sub> H <sub>9</sub> BrNO <sub>2</sub> | 289.9811 | -2.1      | 44.0   | 1 | 100.00 | 9.5   | even |                |      | ok     | M+H    |



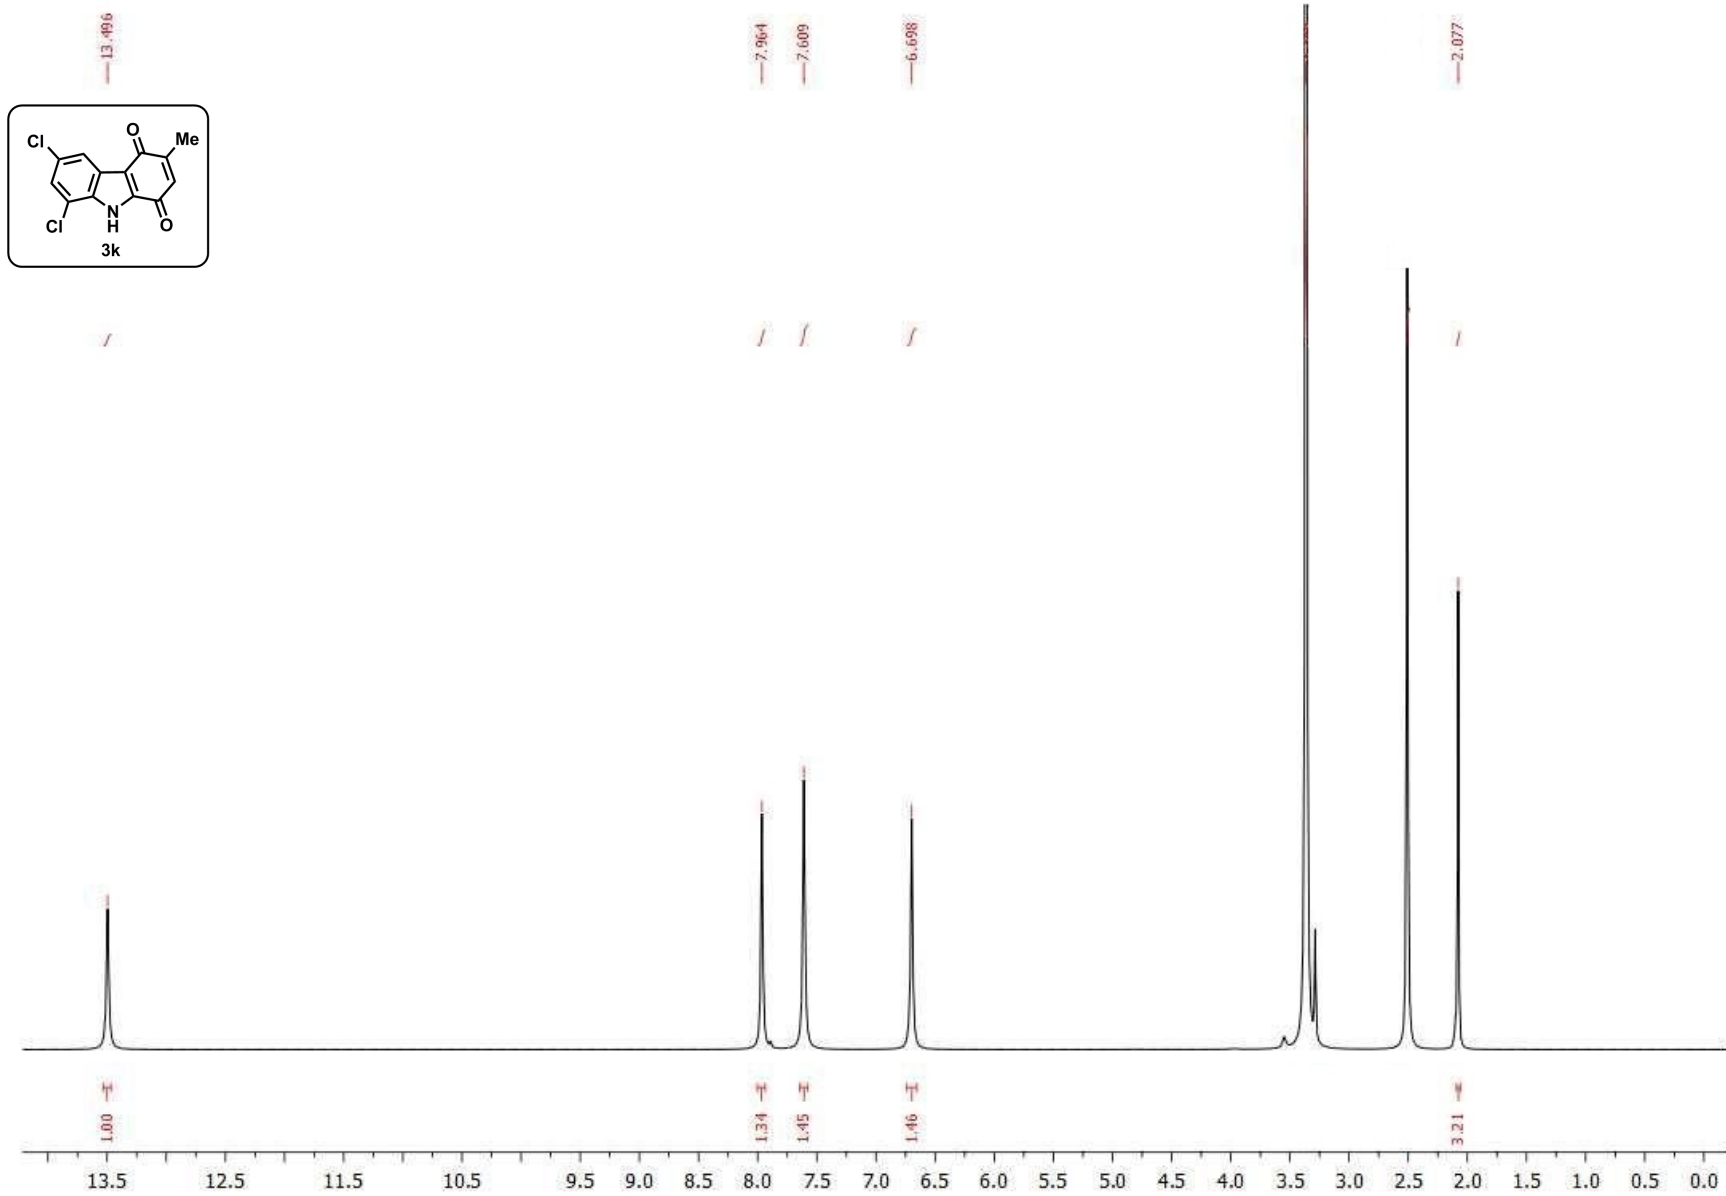

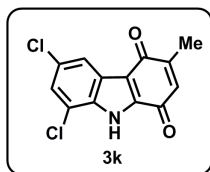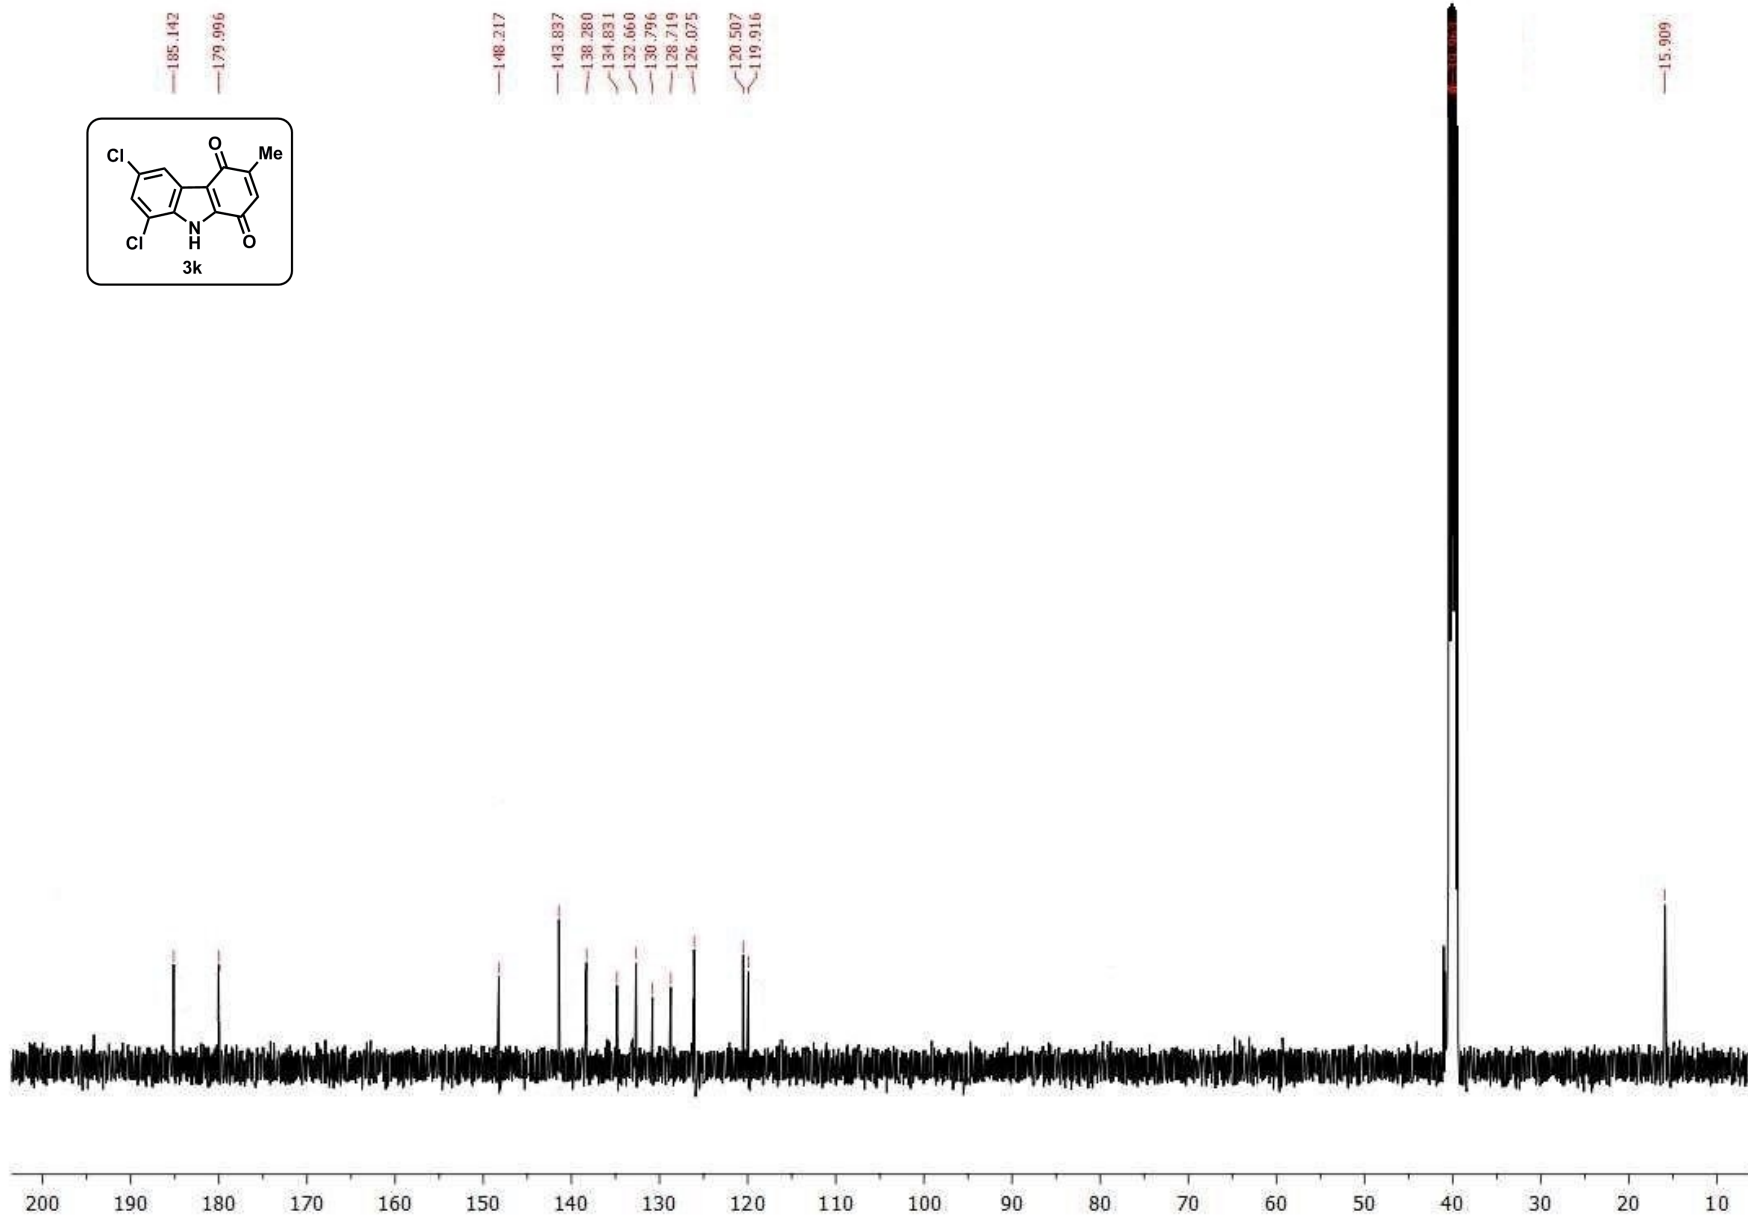

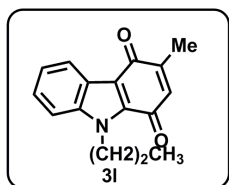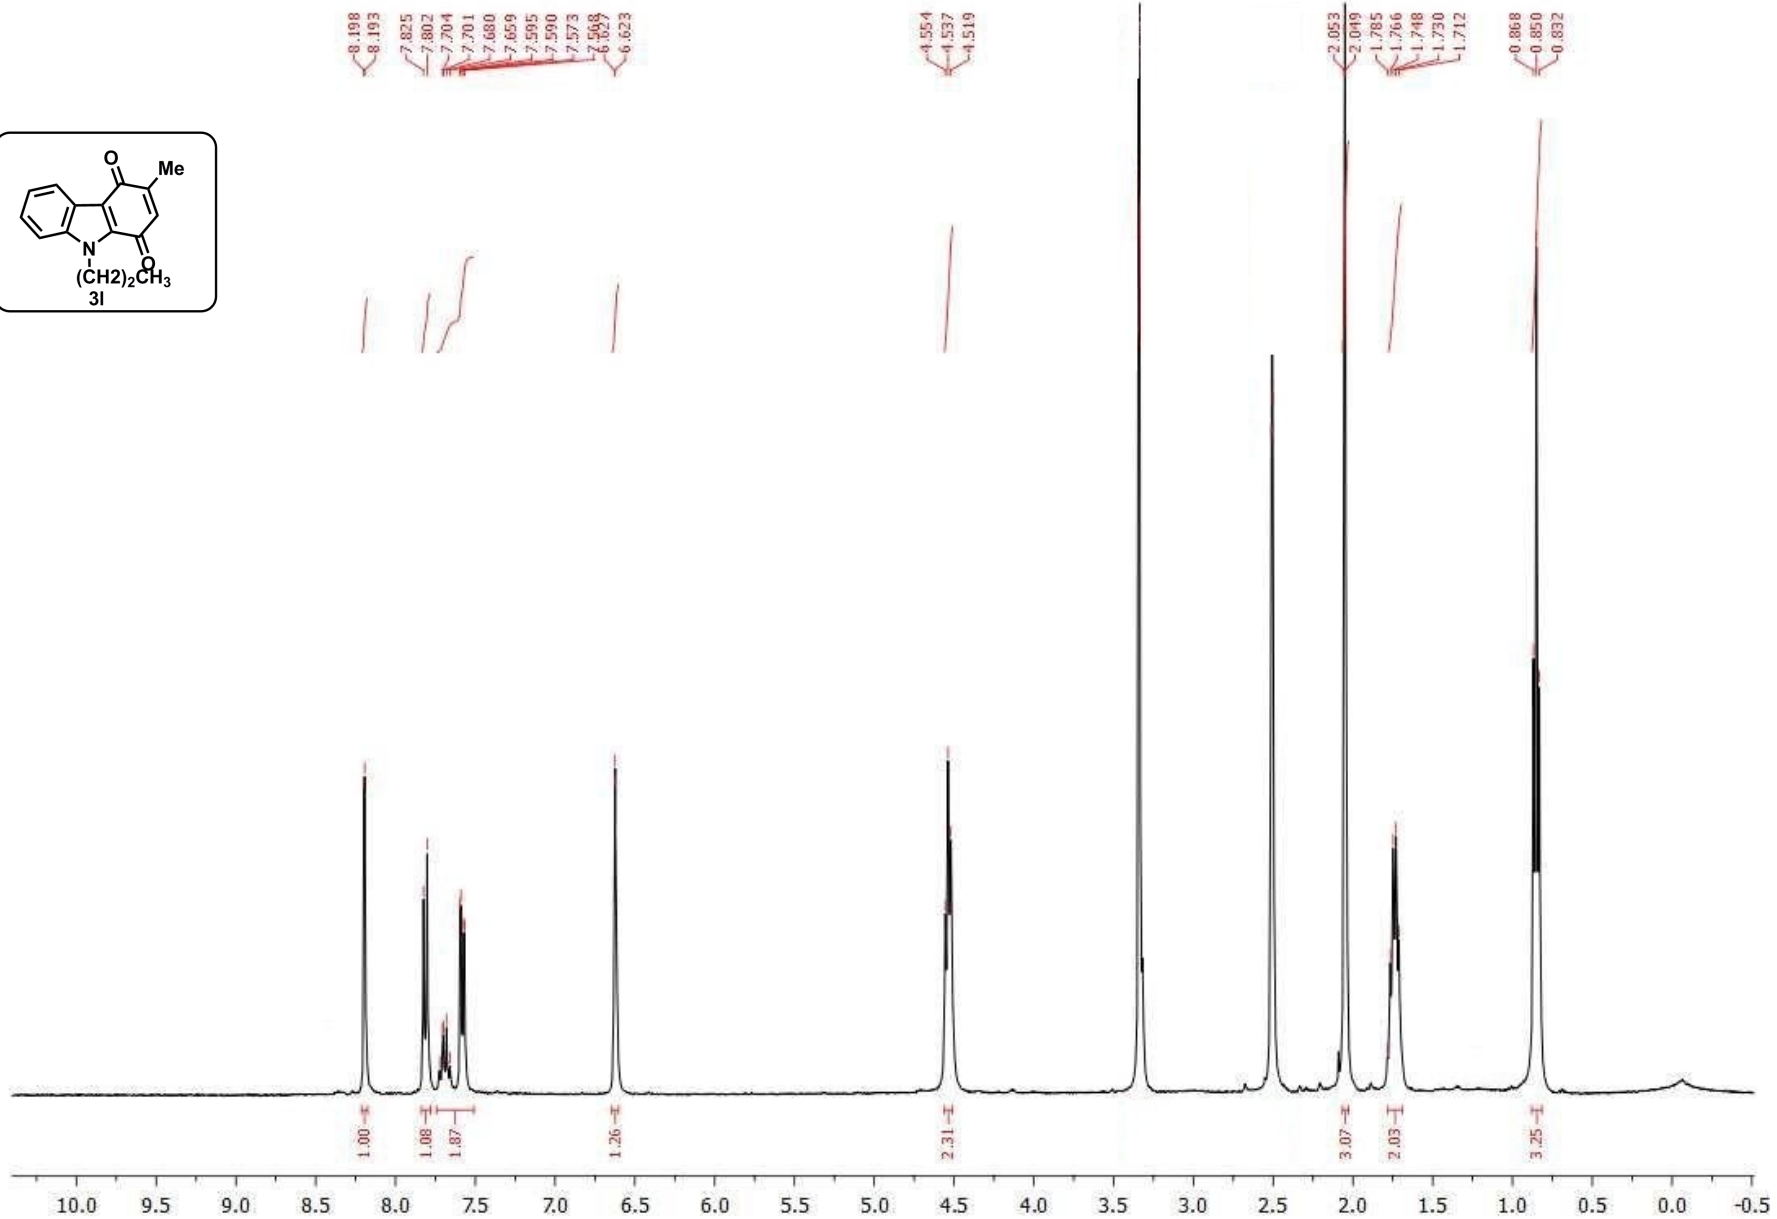

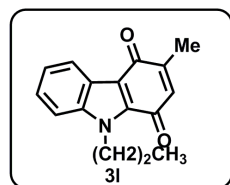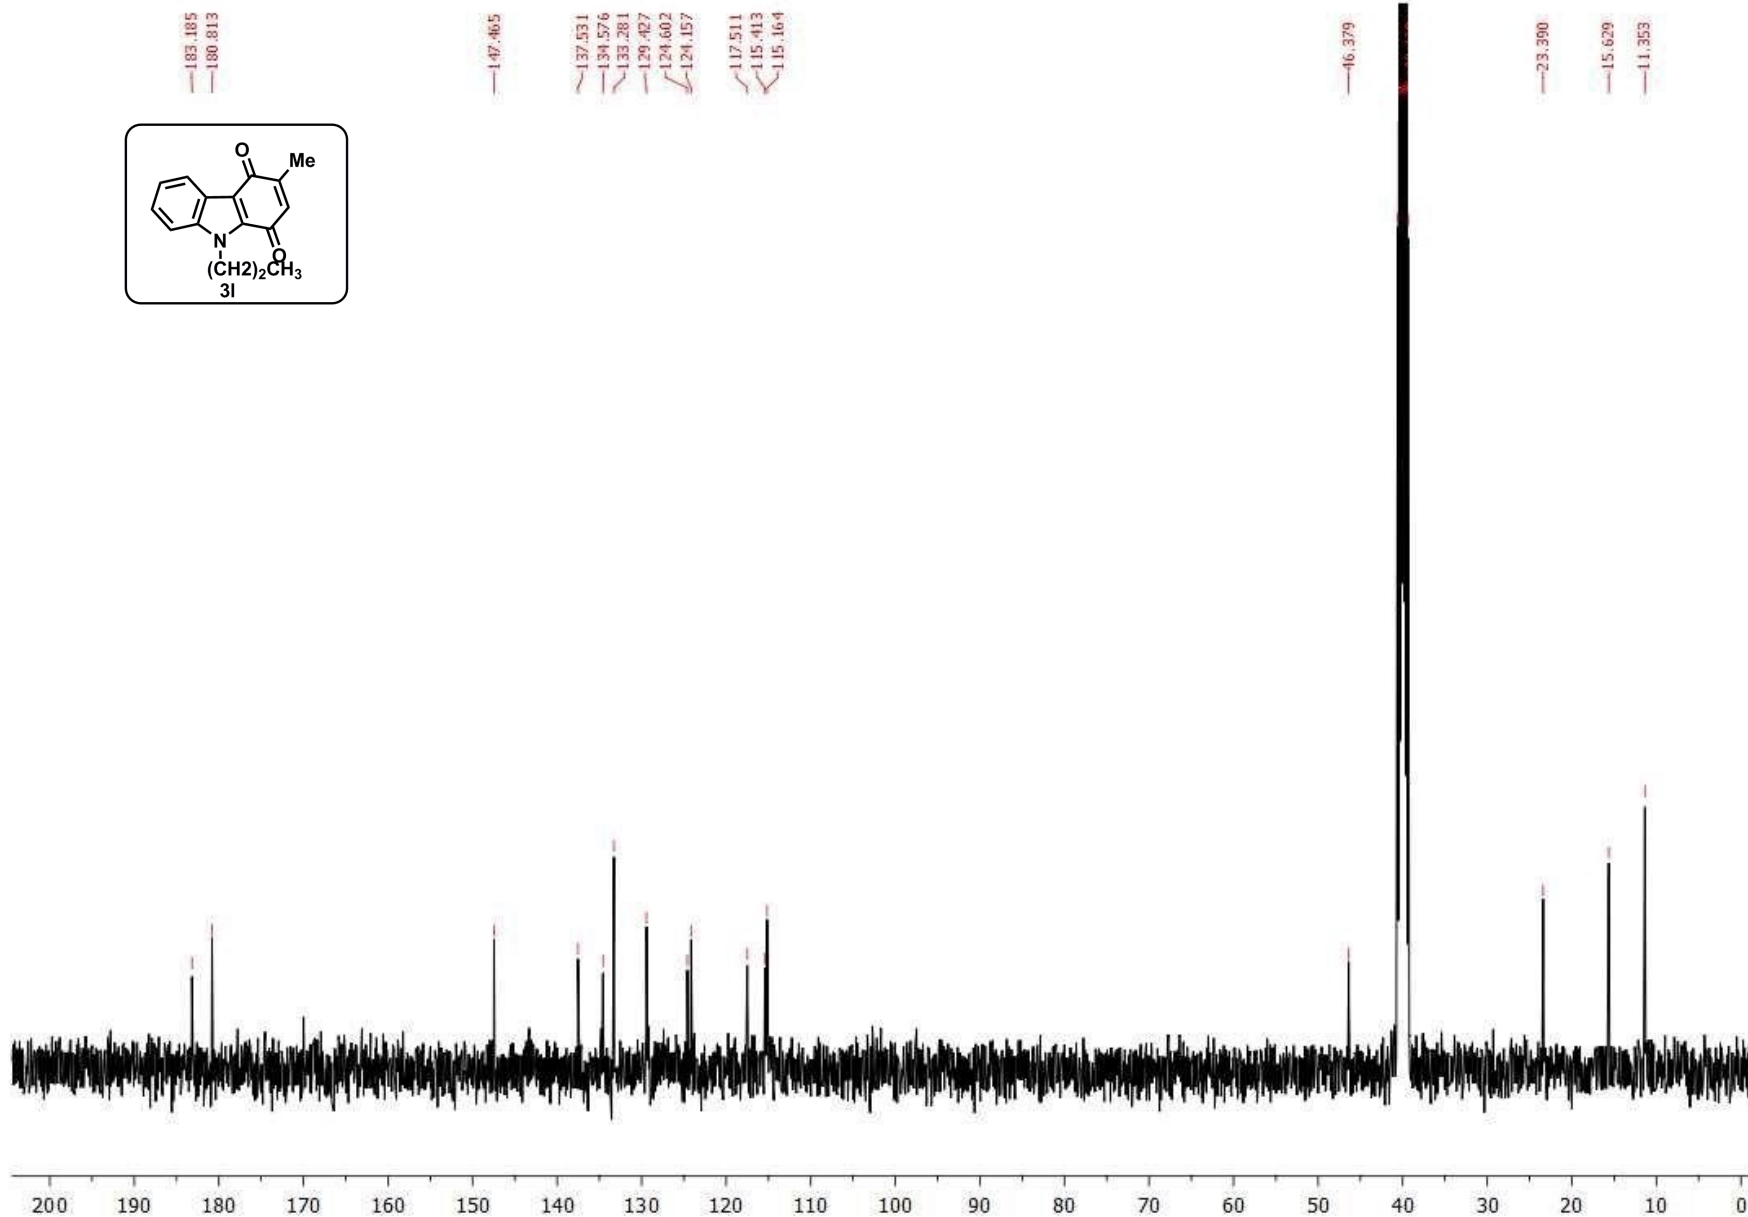

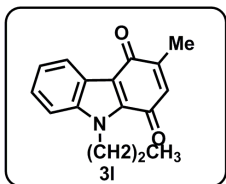

134.576  
133.281  
129.427  
124.157  
115.164

46.379

23.390

15.629

11.353

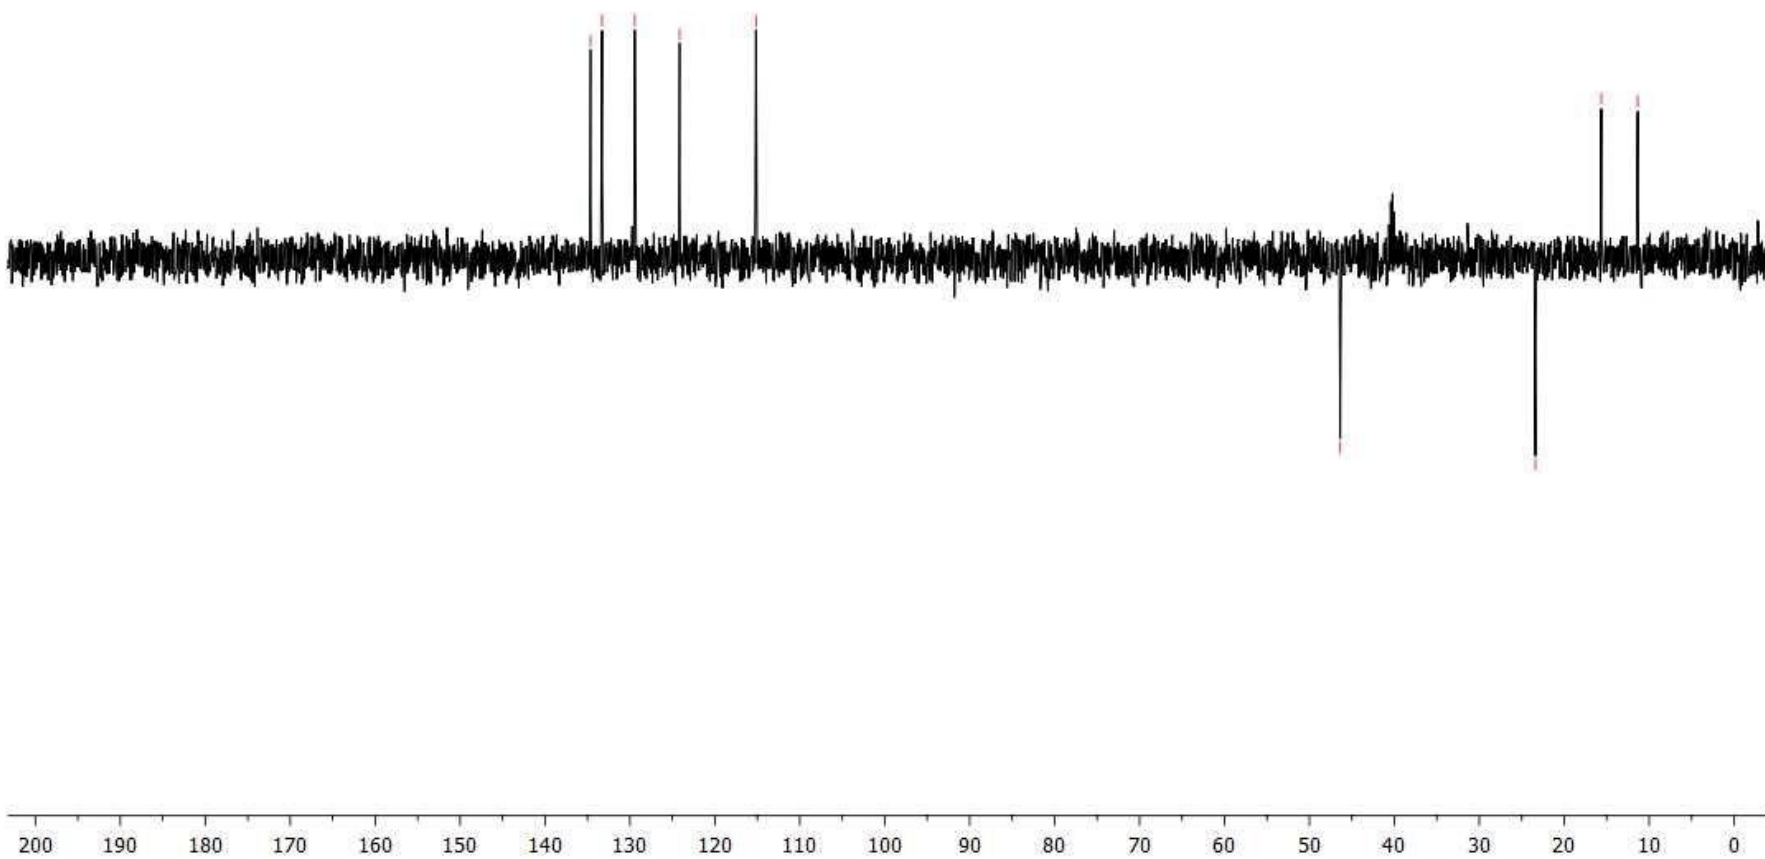

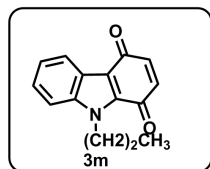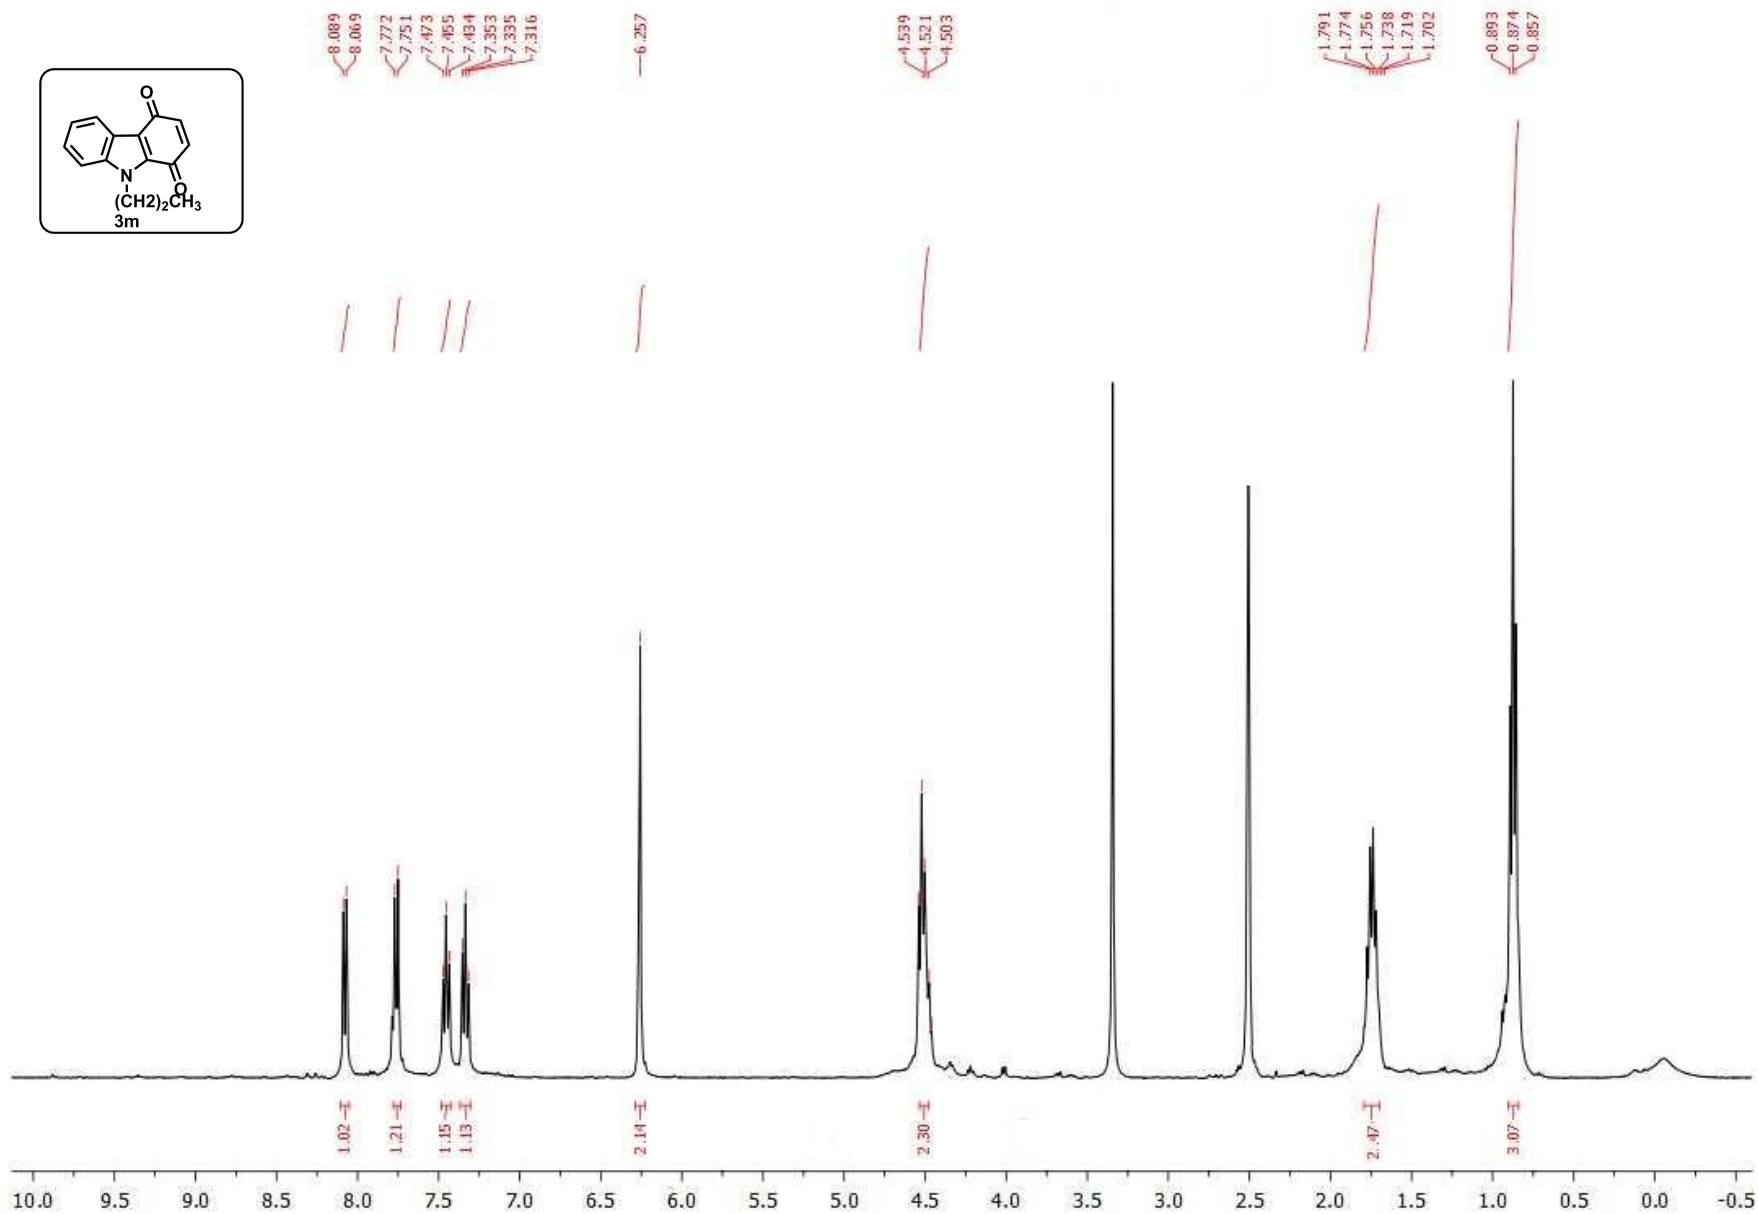

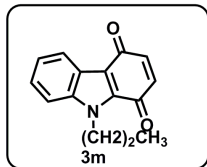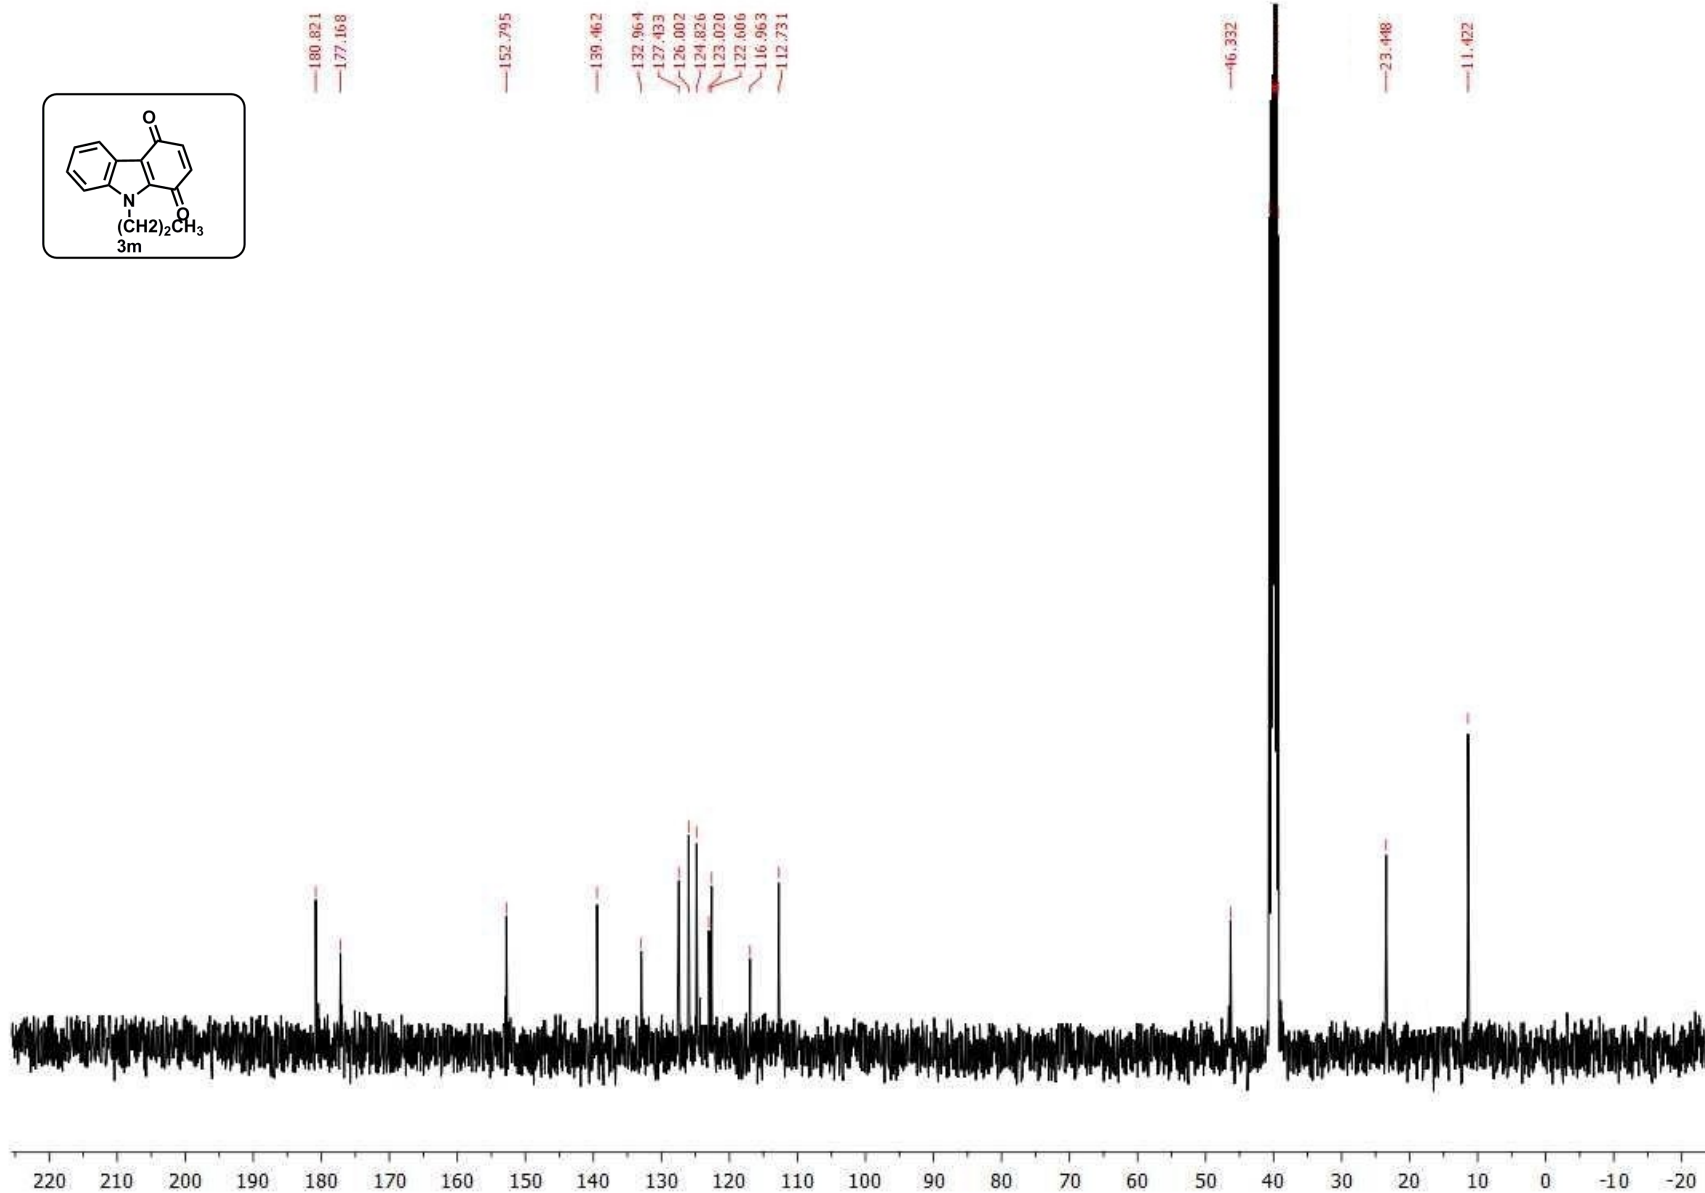

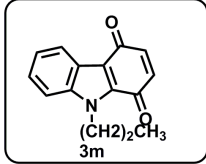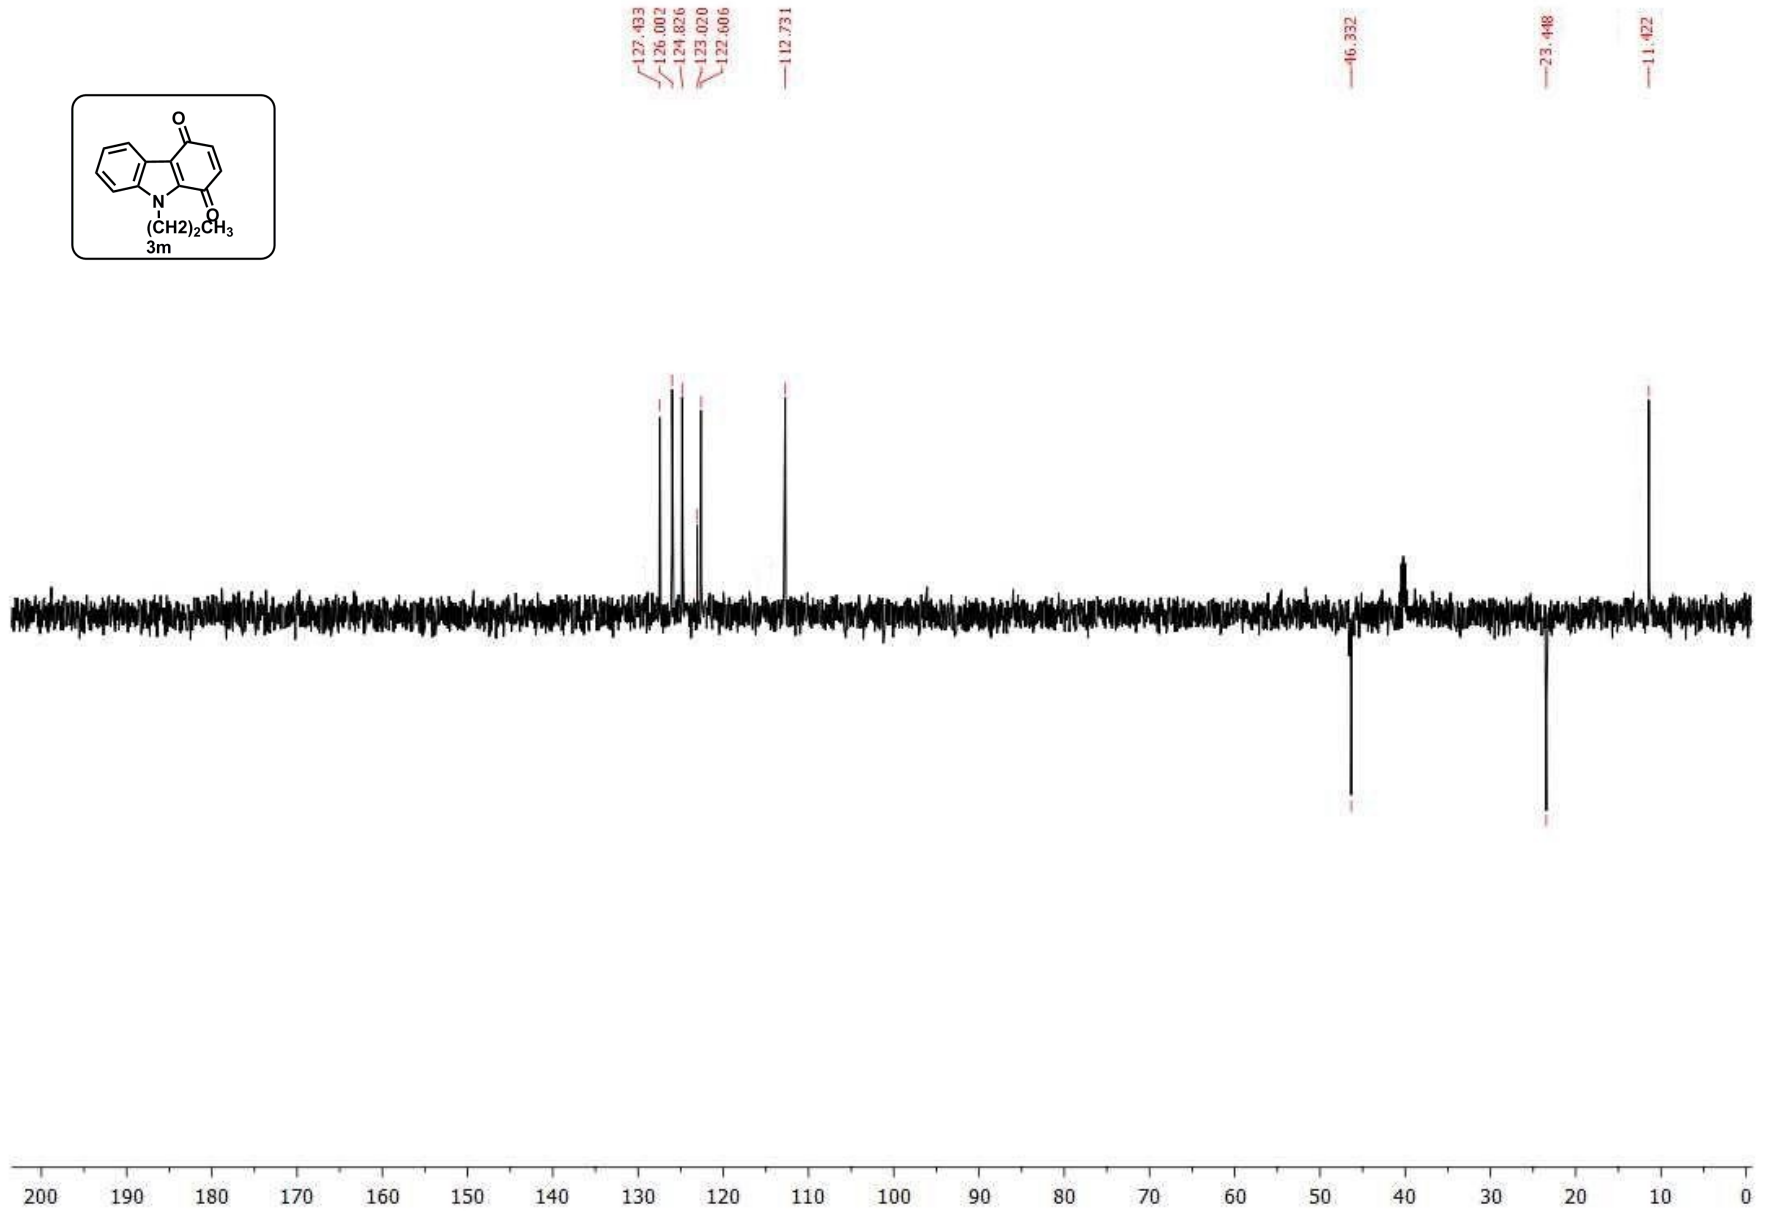



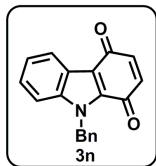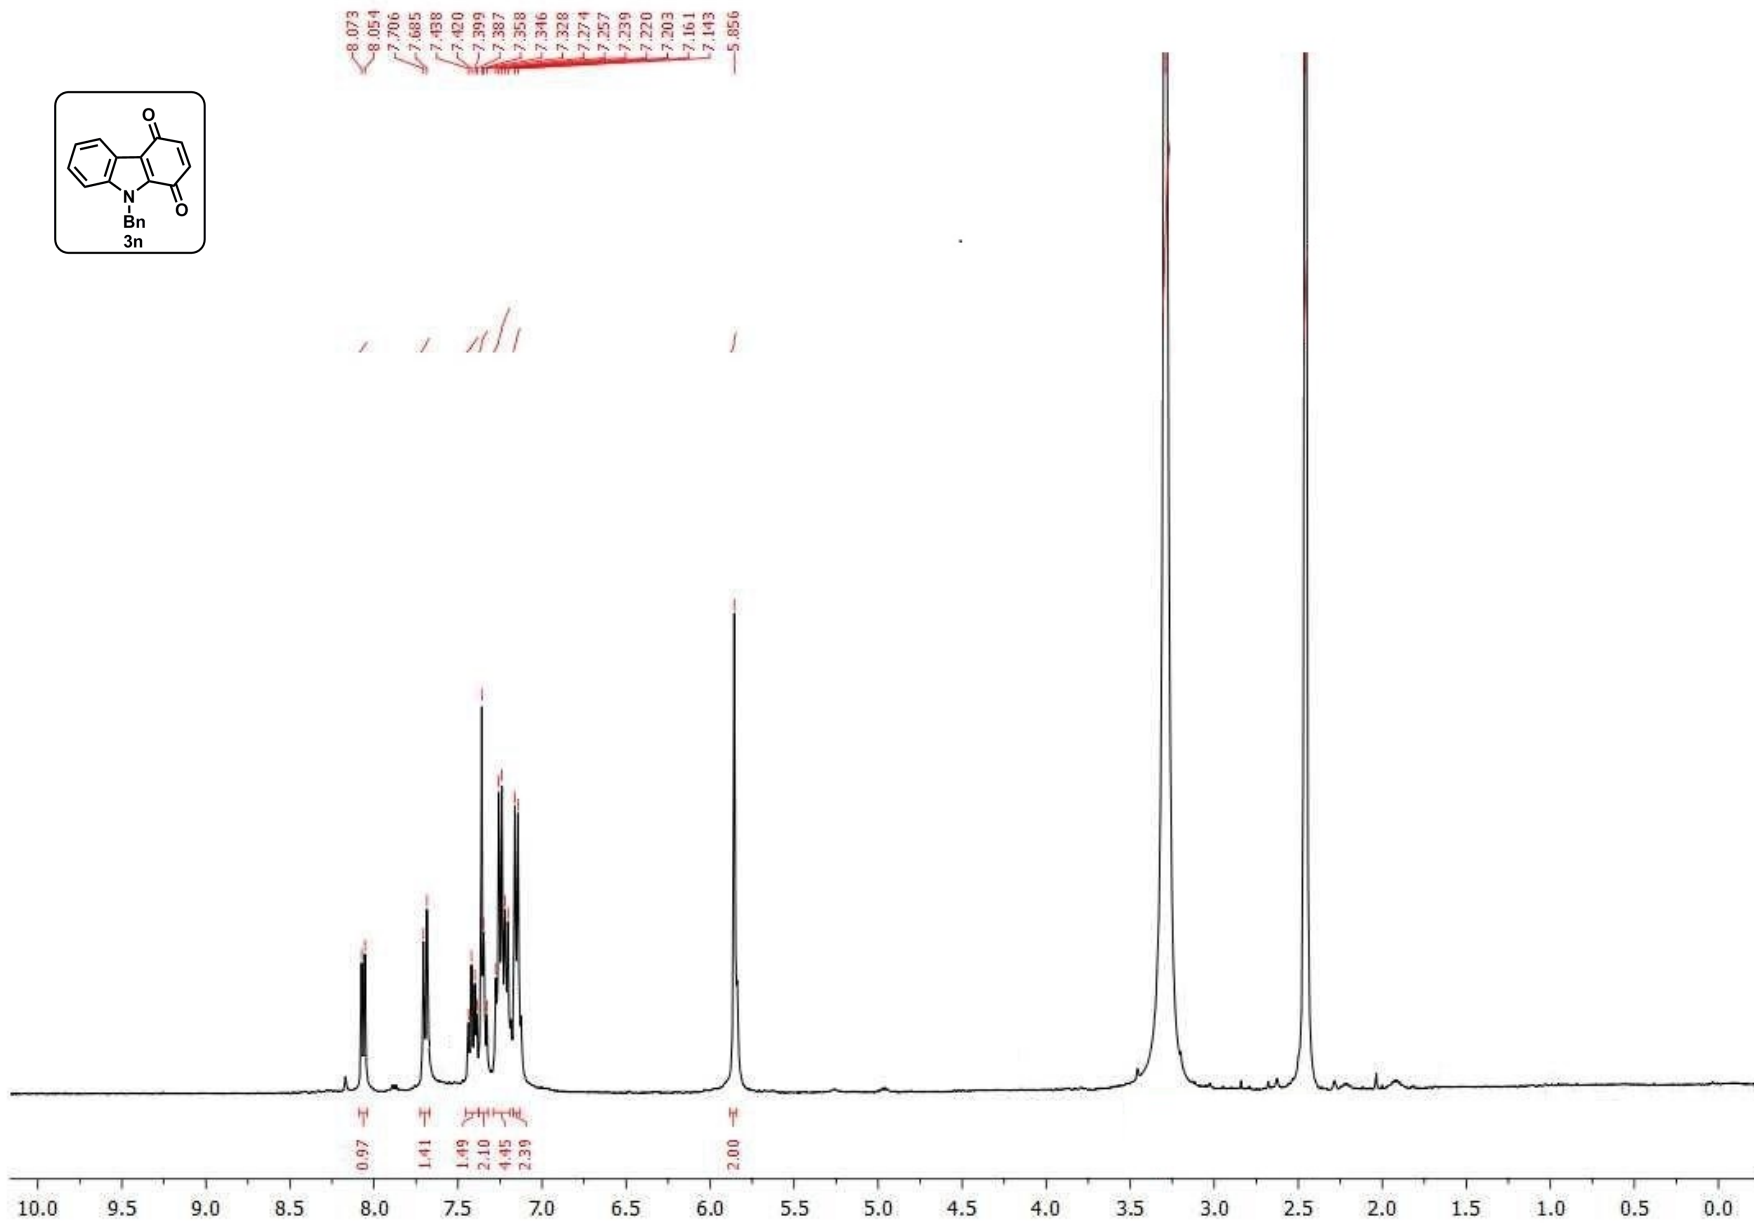

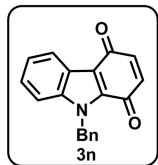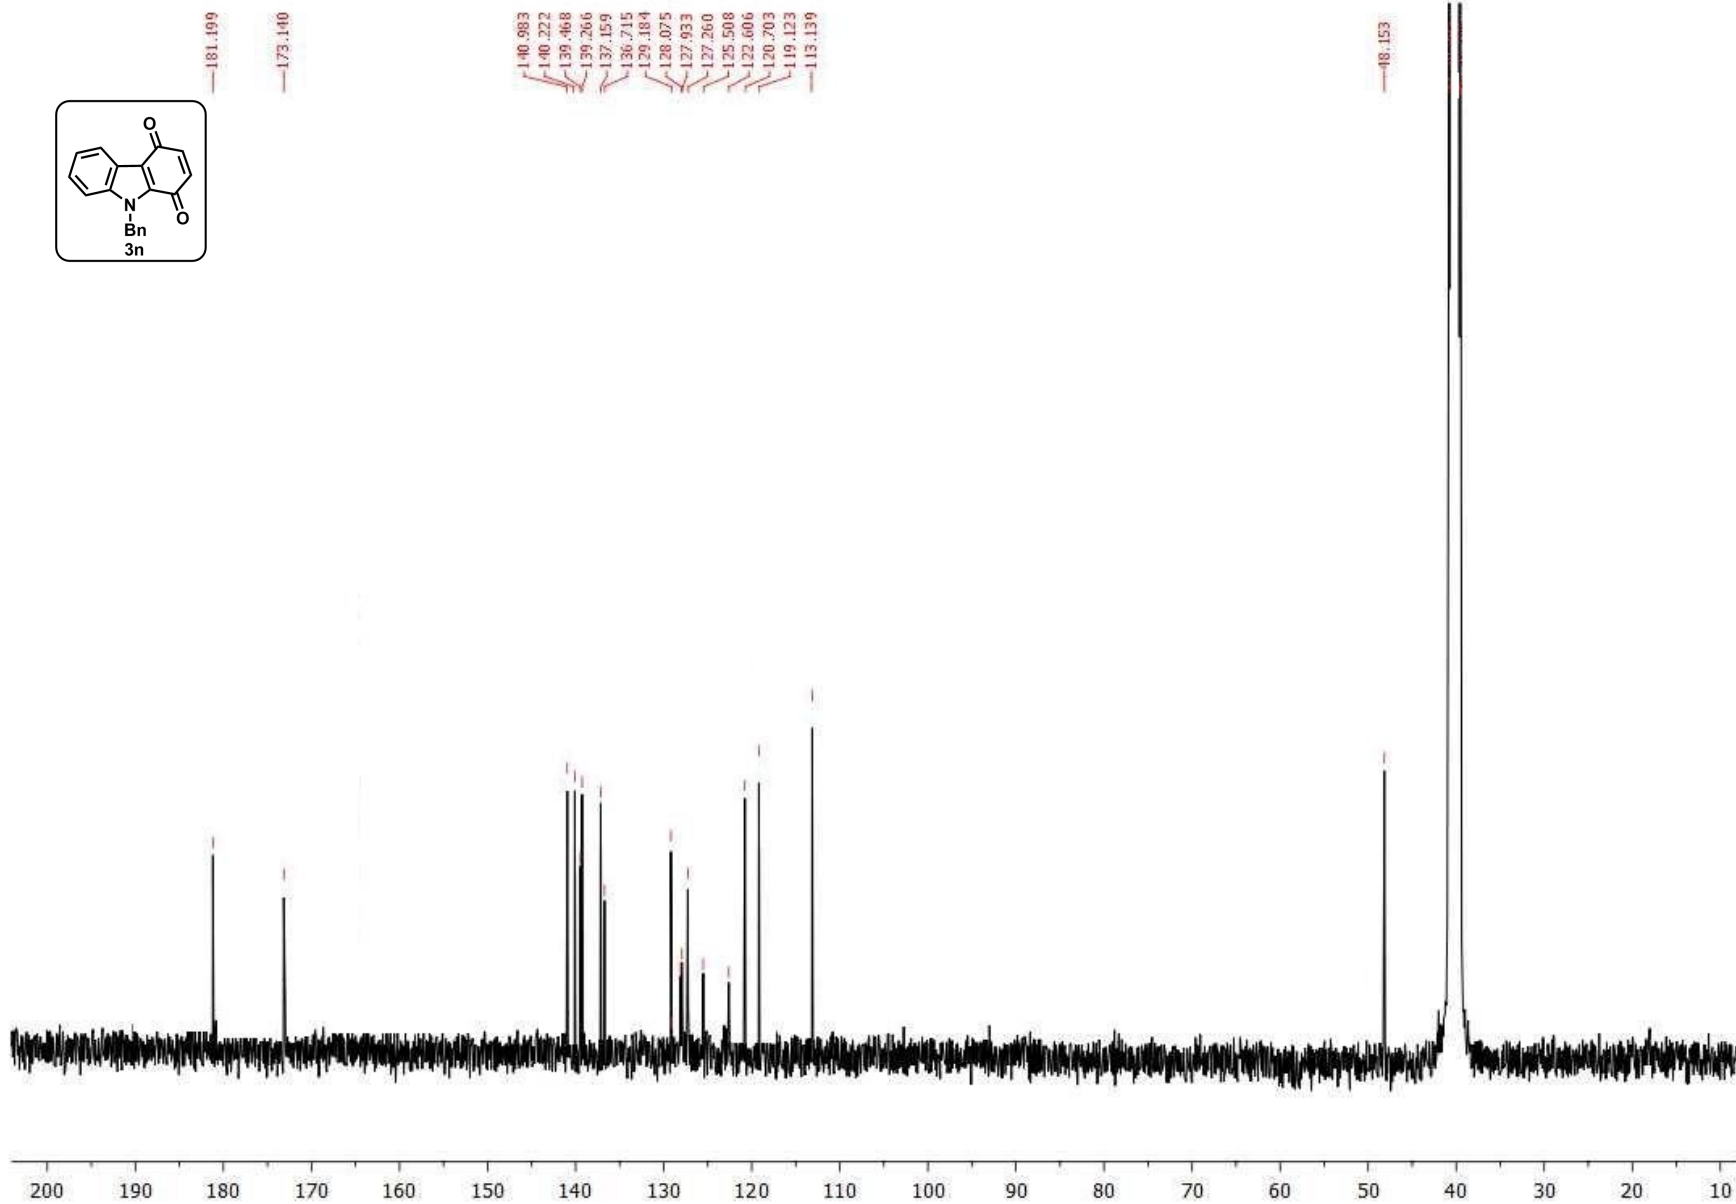

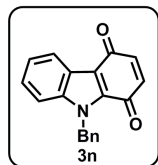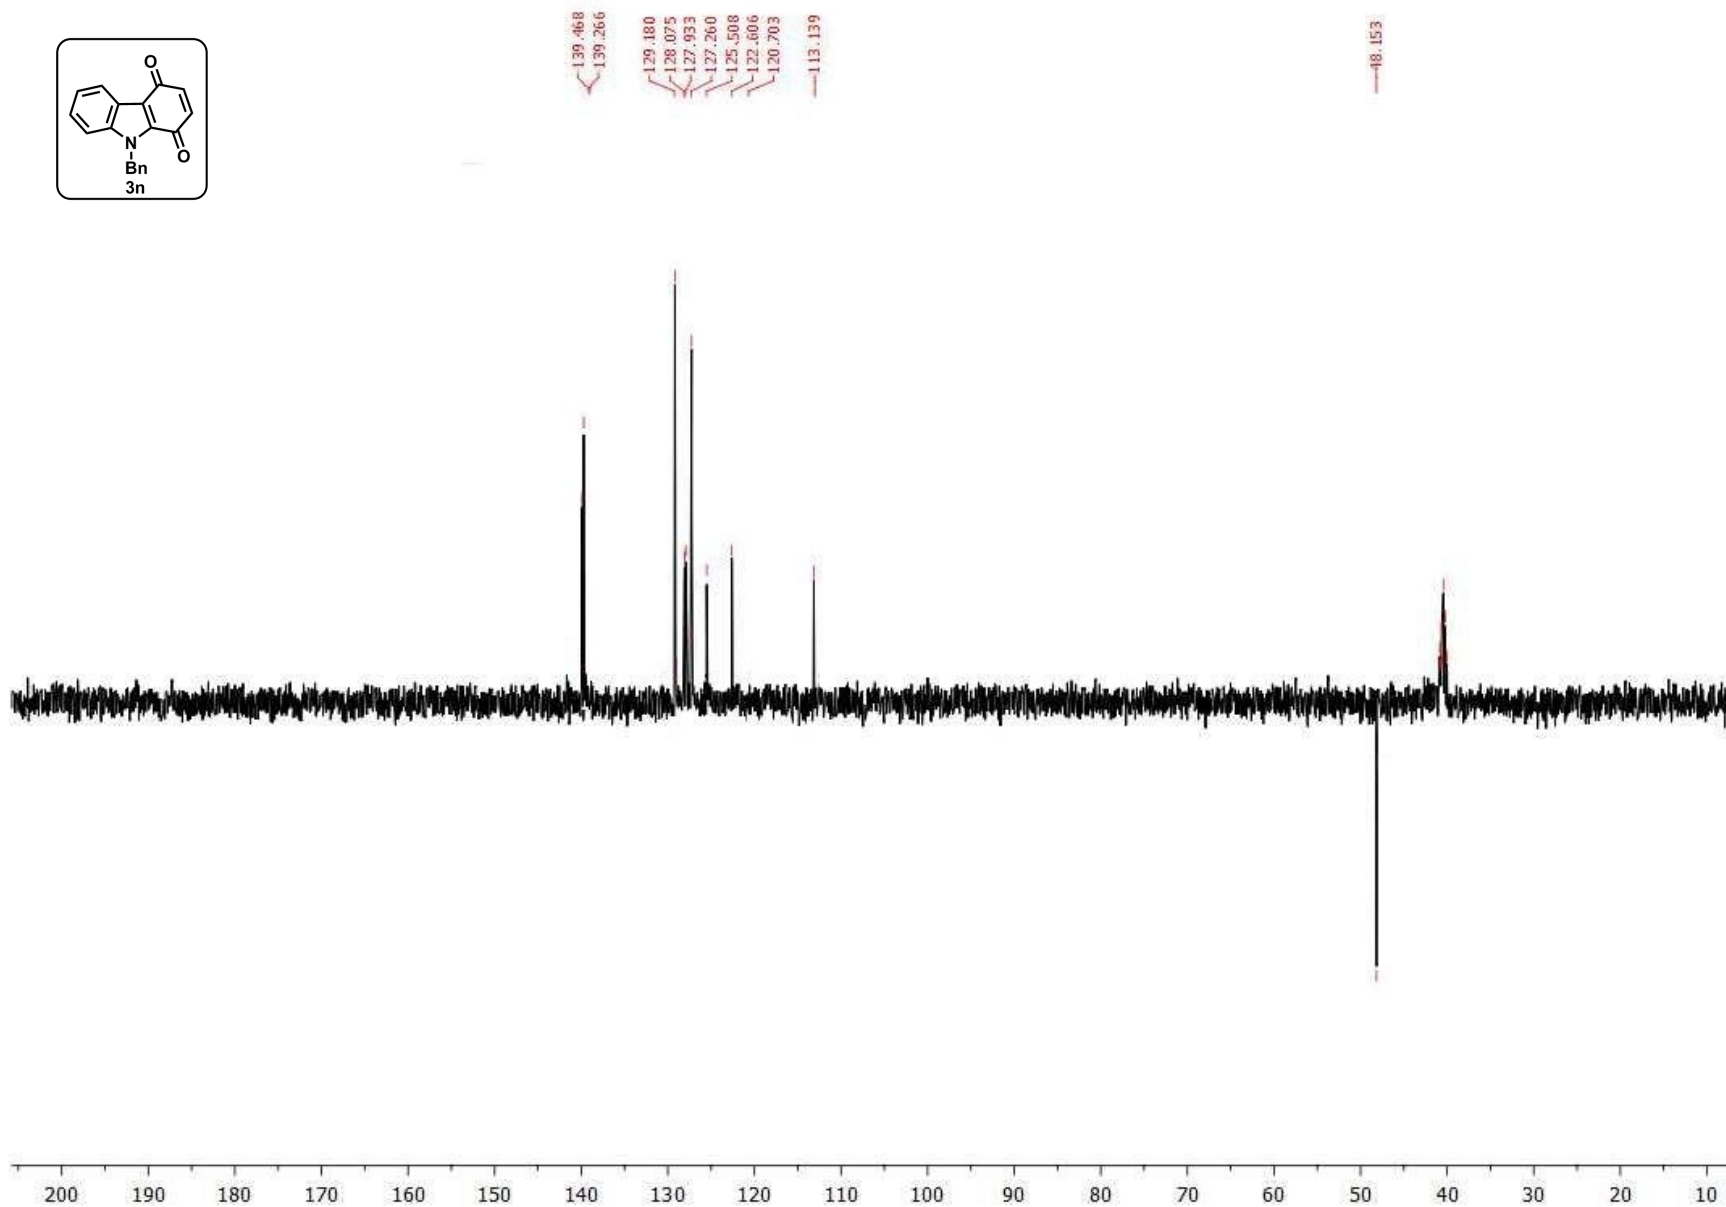

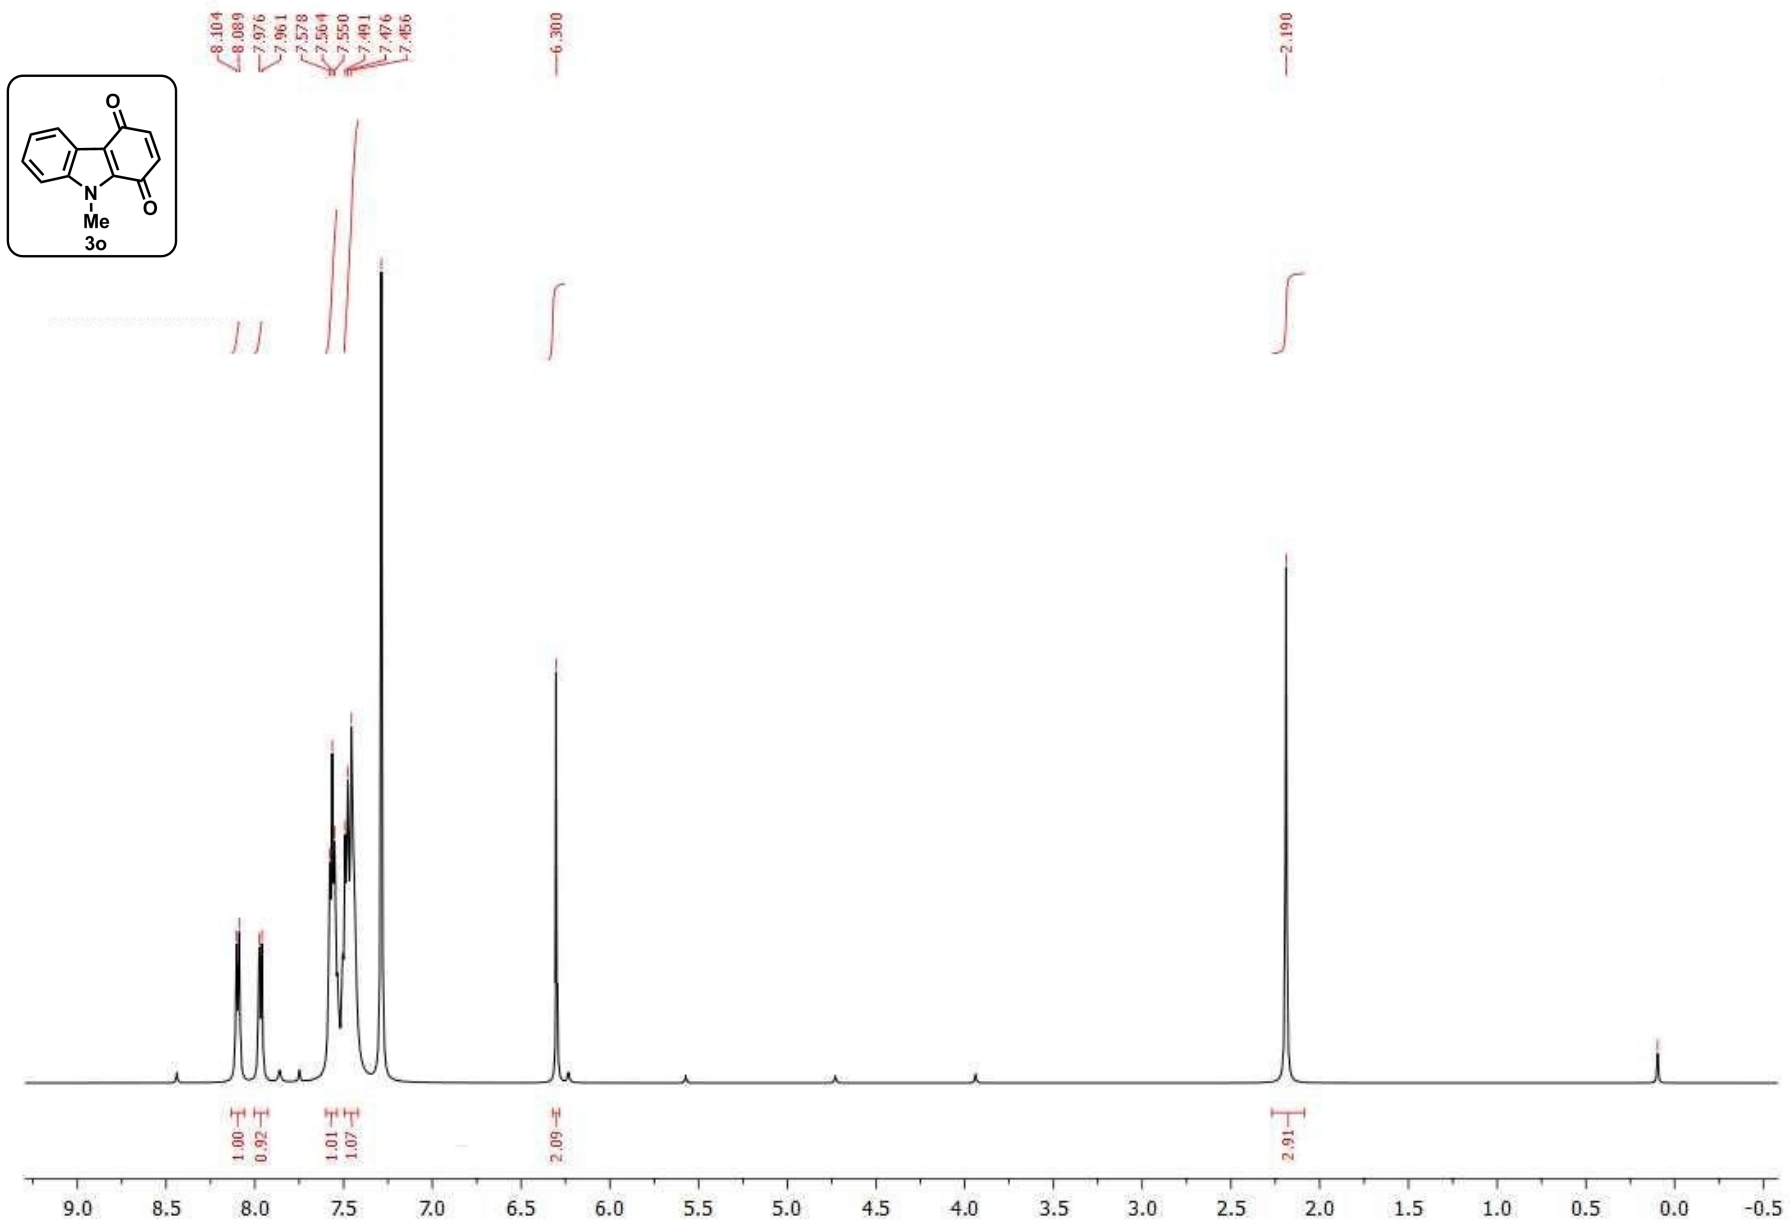

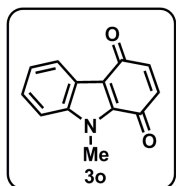

191.575

181.303

145.026

136.010

132.770

130.910

128.445

127.983

127.051

125.659

124.924

117.017

21.921

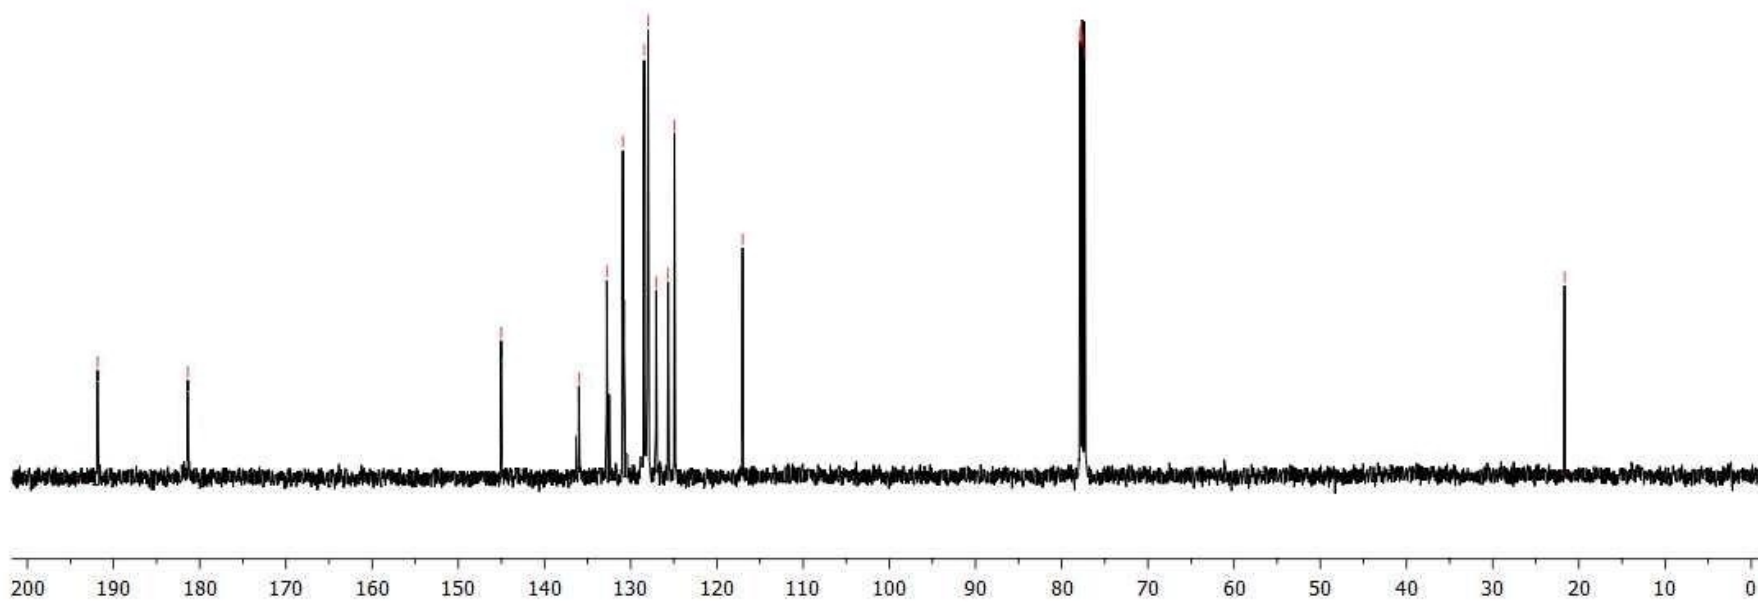

Supplement: d2ob00793b1.pdf [file d2ob00793b1.pdf]
